# Supplementary material for: Risk factors for the prevalence of poor sleep quality in lecturers during COVID-19 pandemic in Ethiopia: an institution-based cross-sectional study
Source: PubMed Central journal article supplement — BMJ Open. 2022 Oct 5;12(10):e066024. doi: 10.1136/bmjopen-2022-066024 (PMC9534775; doi:10.1136/bmjopen-2022-066024), 2022-10-05
Supplement: bmjopen-2022-066024.draft_revisions.pdf [file bmjopen-2022-066024.draft_revisions.pdf]

# BMJ Open

BMJ Open is committed to open peer review. As part of this commitment we make the peer review history of every article we publish publicly available.

When an article is published we post the peer reviewers' comments and the authors' responses online. We also post the versions of the paper that were used during peer review. These are the versions that the peer review comments apply to.

The versions of the paper that follow are the versions that were submitted during the peer review process. They are not the versions of record or the final published versions. They should not be cited or distributed as the published version of this manuscript.

BMJ Open is an open access journal and the full, final, typeset and author-corrected version of record of the manuscript is available on our site with no access controls, subscription charges or pay-per-view fees (<http://bmjopen.bmj.com>).

If you have any questions on BMJ Open's open peer review process please email [info.bmjopen@bmj.com](mailto:info.bmjopen@bmj.com)

# BMJ Open

## **Risk Factors for the Prevalence of Poor Sleep Quality in Lecturers During COVID-19 Pandemic in Ethiopia: an institution-based cross-sectional study**

|                               |                                                                                                                                         |
|-------------------------------|-----------------------------------------------------------------------------------------------------------------------------------------|
| Journal:                      | <i>BMJ Open</i>                                                                                                                         |
| Manuscript ID                 | bmjopen-2022-066024                                                                                                                     |
| Article Type:                 | Original research                                                                                                                       |
| Date Submitted by the Author: | 24-Jun-2022                                                                                                                             |
| Complete List of Authors:     | Hailu Tesfaye, Amensisa; University of Gondar College of Medicine and Health Sciences, Environmental and Occupational Health and Safety |
| Keywords:                     | Sleep medicine < ANAESTHETICS, COVID-19, Epidemiology < INFECTIOUS DISEASES, OCCUPATIONAL & INDUSTRIAL MEDICINE                         |
|                               |                                                                                                                                         |

SCHOLARONE™  
Manuscripts

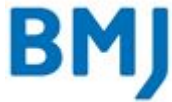

I, the Submitting Author has the right to grant and does grant on behalf of all authors of the Work (as defined in the below author licence), an exclusive licence and/or a non-exclusive licence for contributions from authors who are: i) UK Crown employees; ii) where BMJ has agreed a CC-BY licence shall apply, and/or iii) in accordance with the terms applicable for US Federal Government officers or employees acting as part of their official duties; on a worldwide, perpetual, irrevocable, royalty-free basis to BMJ Publishing Group Ltd ("BMJ") its licensees and where the relevant Journal is co-owned by BMJ to the co-owners of the Journal, to publish the Work in this journal and any other BMJ products and to exploit all rights, as set out in our [licence](#).

The Submitting Author accepts and understands that any supply made under these terms is made by BMJ to the Submitting Author unless you are acting as an employee on behalf of your employer or a postgraduate student of an affiliated institution which is paying any applicable article publishing charge ("APC") for Open Access articles. Where the Submitting Author wishes to make the Work available on an Open Access basis (and intends to pay the relevant APC), the terms of reuse of such Open Access shall be governed by a Creative Commons licence – details of these licences and which [Creative Commons](#) licence will apply to this Work are set out in our licence referred to above.

Other than as permitted in any relevant BMJ Author's Self Archiving Policies, I confirm this Work has not been accepted for publication elsewhere, is not being considered for publication elsewhere and does not duplicate material already published. I confirm all authors consent to publication of this Work and authorise the granting of this licence.

1  
2  
3 **1 Risk Factors for the Prevalence of Poor Sleep Quality in Lecturers During COVID-19**  
4 **2 Pandemic in Ethiopia: an institution-based cross-sectional study**

5  
6  
7 3 Amensisa Hailu Tesfaye<sup>1\*</sup>

8  
9  
10 4 <sup>1</sup>Department of Environmental and Occupational Health and Safety, Institute of Public Health,  
11 5 College of Medicine and Health Sciences, University of Gondar, Ethiopia

12  
13  
14 6 **E-mail addresses:**

15  
16  
17 7 **Email address of authors:** Amensisa Hailu Tesfaye: [amensisahailu@gmail.com](mailto:amensisahailu@gmail.com)

18  
19 8 **\*Corresponding author:** Amensisa Hailu Tesfaye, Department of Environmental and  
20  
21 9 Occupational Health and safety, Institute of Public Health, College of Medicine and Health  
22  
23 10 Sciences, University of Gondar, Gondar, Ethiopia, Email: [amensisahailu@gmail.com](mailto:amensisahailu@gmail.com)

## 23 Abstract

24 **Objective:** This study was conducted to assess the prevalence and risk factors of poor sleep quality  
25 among University of Gondar academic staff, Ethiopia.

26 **Design:** An institution-based cross-sectional study design was employed from March to April  
27 2021. Self-reported poor sleep quality was measured using self-administered Pittsburgh Sleep  
28 Quality Index. The collected data were entered into EpiData version 4.6 and analyzed using  
29 STATA version 14 software. Binary logistic regressions were computed to determine the  
30 association between variables. The association was ascertained using an adjusted Odds ratio  
31 (AOR) with a 95% confidence interval (CI) at a p-value of < 0.05.

32 **Setting:** The study was conducted in the University of Gondar, Northwestern Ethiopia,

33 **Participants:** Six hundred and seven lecturers were participated in this study.

34 **Outcome measures:** The primary outcome is prevalence of poor sleep quality, which was  
35 measured using the Pittsburgh Sleep Quality Index.

36 **Results:** Overall response rate was 95.60% (N = 607). Age ranges from 21 to 70 with a mean of  
37 32.39 (SD ±6.80) years. The magnitude of poor sleep quality during the last month was 60.30%  
38 (95% CI, 56.28%-64.21%). Working > 10 hours per day [AOR= 2.19, 95% CI (1.16, 4.27)],  
39 electronic device use before bedtime [AOR=1.53, 95% CI (1.04, 2.27)], high risk perception of  
40 COVID-19 infections [AOR =1.60, 95% CI (1.04, 2.46)], and perceived job stress [AOR = 2.15  
41 (95% CI, (1.50, 3.08))] were risk factors for poor sleep quality.

42 **Conclusion:** This study divulged that poor sleep quality was intrusive during the COVID-19  
43 pandemic among university teaching staff in Ethiopia. Poor sleep quality was related to working  
44 hours per day, electronic device use, the risk of COVID-19 infections, and job stress. Therefore,  
45 we recommended that university administrators to develop, implement, and evaluate sleep health  
46 promotion programs in the workplace.

47 **Keywords:** Sleep quality, Poor sleep, Academic staff, Lecturers, COVID-19, Ethiopia.

## 51 **Strengths and limitations of this study**

- 52 - The study has focused on one of the most potential groups, i.e., Lecturers that had potential to  
53 affected by poor sleeping quality particularly during COVID-19.
- 54 - This study is the first in kind in exploring the magnitude and factors influencing poor sleep  
55 quality among academic staff in Ethiopia, which has the potential in rendering baseline  
56 information about the conditions and inspires other researchers to further replicate reliable  
57 results.
- 58 - As a limitation, the association between the poor sleep quality of sleep and influencing factors  
59 were based on the academician's subjective reports rather than objective measurements  
60 including actigraphy. Despite these limitations, we feel that the study provides a reasonably  
61 accurate assessment of sleep quality and associated risk factors among study participants. We  
62 recommend future studies to account for different sectors such as telecommunication,  
63 healthcare, transportation, etc. with interventional study design.

## 64 **Background**

65 Scholars described sleep quality (SQ) as "one's perception that they fall asleep easily, sleep for a  
66 sufficient amount of time so that they wake up feeling rested, and can get through their day without  
67 experiencing excessive daytime sleepiness," which could be measured both subjectively and  
68 objectively [1]. In contrast, poor SQ is marked by long sleep delays, low sleep efficiency, and  
69 sleep disorders [2]. Researchers regard SQ as a critical construct because of the high prevalence  
70 of poor SQ and the clear relevance of good SQ to optimal health and functioning [3]. Teaching has  
71 been identified as a profession associated with a high risk of poor sleep quality, particularly among  
72 elementary and secondary school teachers [4-6]; however, little research has been conducted to  
73 quantify the prevalence of poor sleep quality among university academic staff worldwide [7, 8].

74 Academic staffs are at a higher risk of poor sleep quality, burnout, depression, stress, and anxiety  
75 as a result of the current COVID-19 pandemic, which has serious consequences for occupational  
76 health both now and in the future [9]. Likewise, the World Health Organization (WHO) has  
77 classified poor sleep quality as a public health issue that exacerbates the risk of disease and death  
78 [10]. Recent research shows that during the pandemic, sleep quality was impaired and the  
79 prevalence of poor sleep increased in both the working and general population [11-13].  
80 Furthermore, the global COVID-19 pandemic has compelled higher education institutions,

1  
2  
3 81 including Ethiopian universities, to shift from face-to-face to online instruction, which has an  
4 82 impact on sleep quality [14-16]. For example, during the COVID-19 pandemic, 44.2% of  
5 83 Brazilian university academic staff reported poor sleep quality [17]. Moreover, four out of ten  
6 84 people do not get enough sleep, and one in five sleep poorly most nights, making poor sleep the  
7 85 second most common health complaint after pain [18, 19]. So far, epidemiological data on the  
8 86 prevalence of poor sleep quality among university academic staff ranges from 38.9% [8] to 61.3%  
9 87 [7].

15 88 Sleep is a basic human requirement; it is necessary for effective daytime performance and is a  
16 89 predictor of physical and mental health, wellness, and overall quality of life [20, 21]. On the  
17 90 contrary, poor sleep has been linked to a variety of metabolic syndromes, poor glucose metabolism,  
18 91 and poor blood pressure control, all of which contribute to increased risks of cardiovascular  
19 92 disease, poor mental health, poor productivity, and poor quality of life [22-26]. Poor SQ also has  
20 93 significant economic consequences. In the USA, for example, the annual costs of poor sleep have  
21 94 been estimated to be as high as US\$16 billion in healthcare costs and US\$50 billion in lost  
22 95 productivity [27]. In Australia, the costs were estimated to be approximately US\$1.8 billion for  
23 96 the health system and US\$66.3 billion for financial loss and decreased well-being [21, 28, 29].

31 97 Though the cause of poor SQ is multifactorial; cognitive, behavioral, and physiological variables  
32 98 [30], sociodemographic (e.g. old age), low socioeconomic status, poor general health,  
33 99 psychological distress, workload, use of electronic devices, and poor lifestyle behaviors have all  
34 100 been identified as determinants of poor sleep quality [31-36].

39 101 Given the widespread and harmful consequences of poor SQ, it needs to be a top priority for public  
40 102 and occupational health. As previously stated, a thorough review of the literature revealed that  
41 103 even less is known about the prevalence and factors of poor sleep quality of academic staff and  
42 104 other university personnel in developing countries including Ethiopia [37]. The number of  
43 105 universities in Ethiopia is increasing, which is accompanied by an increase in academic staff.  
44 106 However, the lack of reliable and up-to-date data on mental health, especially on sleep quality,  
45 107 makes it difficult for officials to plan for prevention and control measures. Therefore, in the current  
46 108 study, we assessed the prevalence and associated factors of poor sleep quality among academic  
47 109 staff at the University of Gondar, Northwest Ethiopia.

## 55 110 **Methods and materials**

## 111 **Study design and period**

112 An institution-based cross-sectional study was employed from 17 March to 17 April in 2021.

## 113 **Study setting and area**

114 The study was conducted in the University of Gondar, which is found in the oldest and historical  
115 place of Gondar City, Northwestern Ethiopia, located 737 km from Addis Ababa, the capital of  
116 Ethiopia [38]. The establishment of the University dates back to 1954. The University has five  
117 campuses including the College of Medicine and Health Sciences and Comprehensive Specialized  
118 Referral Hospital (CMHS), Maraki, Atse Tewdros, Atse Fasil, and Teda [39]. During the study  
119 period, there were a total of 2,858 academic staff on all campuses.

## 120 **Source and Study populations**

121 All academic staff at the University of Gondar were the source population. Whereas, the randomly  
122 selected academic staff in each campus were the study population.

## 123 **Inclusion and Exclusion Criteria**

124 Academic staff who had at least one year of teaching experience and who were available during  
125 data collection time were included, while academic staff with critical illness, maternity leave, and  
126 sabbatical leave were excluded.

## 127 **Sample size determination and sampling technique**

128 The sample size was calculated by using single population proportion formula [40] by considering  
129 the following statistical assumptions:

130 Confidence level (CI) of 95%

131 Proportion = 50% (no previous study in the study area)

132 Margin of error of 5%

133 Using the following single proportion formula:

$$134 n = (Z\alpha/2)^2 \frac{[p(1-p)]}{d^2} \text{ where:}$$

135  $n$  = initial sample size,

136  $Z = 1.96$ , the corresponding  $Z$ -score for the 95% CI



1  
2  
3 137 P = Proportion = 50%

4  
5 138 d = Margin of error = 5% = 0.05

6  
7  
8 139  $n = (1.96)^2 \frac{[0.5(1-0.5)]}{0.05^2} = 384$

9  
10 140 By considering a 10% non-response rate, and a design effect of 1.5 as in the absence of previous  
11 141 literature taking a design effect of 1.5 to 2.0 is suggested [41], the final sample size was 635  
12 142 participants. We employed a stratified sampling technique to select participants from the five  
13 143 campuses of the University of Gondar. The number of sample points was determined by a  
14 144 proportional allocation for each stratum. Hence, there are a total of 1027 academic staff in College  
15 145 of Medicine and Health Sciences (N1=1027), in Maraki campus a total of 630 academic staff  
16 146 (N2=630), in Tewdros campus a total of 509 academic staff (N3=509), in Fasil campus a total of  
17 147 536 academic staff (N4=536), in Teda campus a total of 156 academic staff (N5=156).  
18 148 Consequently, the numbers of participants from each campus were 228, 140, 119, 113, and 35  
19 149 from the College of Medicine and Health Sciences, Maraki, Fasil, Tewodros, and Teda campuses,  
20 150 respectively. Then, the required sample sizes were selected applying a simple random sampling  
21 151 technique and OpenEpi random program version 3 was used to randomize academic staff from  
22 152 each stratum.

### 23 153 **Operational definitions**

24 154 **Poor sleep quality:** this was measured using the Pittsburgh Sleep Quality Index (PSQI): if the  
25 155 summation score of the participant was >5 points out of 21 points, poor sleep quality was  
26 156 ascertained [42, 43].

27 157 **Body mass index (BMI):** weight in kilograms divided by the square of the height in meters (kg/m<sup>2</sup>)  
28 158 categorized as underweight = BMI < 18, normal (health) = BMI 18.5– 24.9, overweight = BMI  
29 159 25.0–29.9 =, and obese = BMI ≥ 30.0 [44].

30 160 **Alcohol drinker:** the consumption of any kind of alcohol at least two times per week [45].

31 161 **Cigarette smoker:** smoking at least one stick of cigarette per day [46].

32 162 **Khat chewer:** academician who had a history of chewing khat in the past one month [47].

33 163 **Doing physical exercise:** doing any kind of sports activity at least two times per week with a  
34 164 duration of at least 30 minutes [48].

1  
2  
3 165 **Electronic device use:** if the participant utilizes/ watches at least one of the following: television,  
4 166 computer, tablet, or mobile phone in bed before going to sleep [49].

7 167 **Chronic illness:** illnesses that can be managed, but cannot be cured and have a greater risk of  
8 168 developing a poor quality of sleep, such as asthma, diabetes mellitus, stroke, kidney stone,  
9 169 hypertension [50].

12 170 **Risk perception of COVID-19 infection:** which was assessed by three questions, with a response  
13 171 based on a 5-point Likert scale, with a higher total score indicating a high perceived risk of  
14 172 COVID-19 [51].

18 173 **Job satisfaction:** the sum of generic job satisfaction scale score of 32 or above [52].

20 174 **Perceived job stress:** a workplace stress scale score of 21 or above [53].

### 23 175 **Data Collection Tools and Procedures**

25 176 Data were collected through a validated self-administered standardized structured questionnaire.  
26 177 The questionnaire was adapted after an extensive review of related literature and similar study  
27 178 tools [7, 47, 50, 54-56]. The questionnaire embraces three sections containing different items. The  
28 179 first section, socio-demographic characteristics assesses information on age, sex, religion,  
29 180 educational status, working experience, and monthly salary. The second element of the  
30 181 questionnaire hugs information on sleep quality, which was assessed by using the PSQI, a 19-item  
31 182 self-rated scale that examined Sleep Quality and disturbances over a 1-month time interval. The  
32 183 tool mainly addresses seven sleep components including; sleep perception, sleep latency, sleep  
33 184 duration, habitual sleep efficiency, sleep disturbances, use of sleep medication, and daytime  
34 185 dysfunction during the last one month. The total PSQI score was calculated by summing up the  
35 186 seven component scores. Scoring of the answers is based on a 0 to 3 scale, whereby 3 reflects the  
36 187 negative extreme on the Likert scale. The sum of the score ranges from 0 to 21, in which the higher  
37 188 scores indicate poor sleep quality and the lower scores indicate good sleep quality [2]. Individuals  
38 189 scoring > 5 were considered poor sleep quality. The PSQI instrument has been validated as reliable  
39 190 for use in Ethiopia [43] and has been used in several studies in other countries [4, 57]. The last  
40 191 part of the questionnaire includes information used to assess behavioral factors and psychosocial  
41 192 factors like cigarette smoking (yes/no), BMI (kg/m<sup>2</sup>), physical activity (yes/no), alcohol

1  
2  
3 193 consumption (yes/no), use of the electronic device before bedtime (yes/no), history of chronic  
4 194 illness (yes/no), risk perception of COVID-19, job satisfaction, job stress, and workload.

5  
6  
7 195 Risk perception regarding COVID-19 in this study was measured using three questions: concern  
8 196 about their health, perceived risk of being infected with coronavirus, and the potential risk to their  
9 197 family, loved ones, or others due to their role in the academic environment. Responses for each  
10 198 question were rated on a 5-point Likert scale (ranging from 1 = not worried at all to 5 = extremely  
11 199 worried). The total score of the scale was the sum of the three items, ranging from 3 to 15, with a  
12 200 higher total score indicating a greater perceived risk of COVID-19 [51, 58]. We used the 10-item  
13 201 generic job satisfaction scale questionnaire to measure academician perceived job satisfaction [52].  
14 202 Perceived job-related stress of the participants was collected using the 8-item workplace stress  
15 203 scale questionnaire [53]. The instruments used in the current study have been employed in previous  
16 204 studies conducted in the country's context [59-62].

### 25 205 **Data quality control**

26  
27 206 The questionnaire was first developed in English and translated into the local language Amharic  
28 207 and back to English by language experts and professionals to ensure consistency. Two BSc  
29 208 psychiatric nurses working in the University of Gondar comprehensive specialized hospital were  
30 209 involved in data collection after they took adequate training and orientation. MSc psychiatric nurse  
31 210 supervisors working in the College of Medicine and Health Sciences at the University of Gondar  
32 211 were recruited. The data collectors and supervisor took the orientation on issues relating to the  
33 212 clarity of the questions, objectives of the study, confidentiality of information, and the voluntary  
34 213 involvement (consent) in the study, and on time of data collection as study participant's regular  
35 214 duties should not be compromised. The principal investigator supervised both data collectors and  
36 215 supervisors. To ensure the quality and reliability of the questionnaire, a pre-test was conducted on  
37 216 5% (31) of the sample size at Teda Health Sciences College in Gondar city, and the College was  
38 217 not included in the final survey. Based on the finding from the pretest analysis, a few modifications  
39 218 such as some misinterpretations and ambiguities were corrected, and the time taken for the data  
40 219 collection was estimated. When any problem during the data collection, the feedback was given  
41 220 by discussing it with the principal investigator, supervisor and, data collectors.

### 53 221 **Data processing and analysis**

222 Data were checked for completeness and entered into Epi-data version 4.6 and then exported to  
 223 STATA Version 14 for further analysis. We performed descriptive statistics and presented the  
 224 results with narration, tabulation, and graphical presentation. Normality, outliers, and  
 225 multicollinearity of the variables were checked before running bivariable and multivariable binary  
 226 logistic regression analysis where multicollinearity assumption was checked by a variance  
 227 inflation factor (VIF) and all variables showed values of  $<5$ . Thus, we found no evidence of  
 228 multicollinearity. Also, the reliability of the questionnaire was tested using Cronbach's Alpha and  
 229 found a reliable Cronbach's Alpha = 0.79, and therefore the questionnaire was tolerable for its  
 230 consistency in repeating what have previously been measured using the tool [43].

231 The association between variables was computed with a binary logistic regression. Variables with  
 232 p-values of  $<0.2$  in the bivariable logistic regression analysis were exported to a multivariable  
 233 logistic regression to control the potential effects of confounders. Lastly, statistically significant  
 234 variables were established at p-value  $< 0.05$  in a multivariable binary logistic regression model,  
 235 and an adjusted odds ratio (AOR) with a confidence interval of 95% was reported to measure the  
 236 strength of association. The final model was checked for goodness-of-fit using the Hosmer–  
 237 Lemeshow test, and the result explained a good fit ( $p=0.65$ ) [63].

## 238 Results

### 239 Socio-demographic characteristics of study participants

240 A total of 635 questionnaires were distributed giving a response rate of 95.59% (N = 607). The  
 241 participants' age was ranged from 21 to 70 with a mean ( $\pm$ SD) of 32.39 ( $\pm$  6.80) years old. More  
 242 than two-thirds, (71.83%) of the participants were males and the majority of them, 362 (59.64%)  
 243 of them indicated they were married. Regarding educational status, 416 (68.53%) of the  
 244 participants were master degree holders. The median estimated (interquartile range (IQR) monthly  
 245 income of the participants was 11305 (10700-13600) Ethiopian Birr (ETB) (**Table 1**).

246 **Table 1:** Socio-demographic characteristics of academic staff in University of Gondar, Ethiopia,  
 247 2021 (N=607).

| Variables  | Frequency (n) | Percent (%) |
|------------|---------------|-------------|
| <b>Sex</b> |               |             |
| Male       | 436           | 71.83       |

|                                 |     |       |
|---------------------------------|-----|-------|
| Female                          | 171 | 28.17 |
| <b>Age (years)</b>              |     |       |
| 21-29                           | 226 | 37.23 |
| 30-39                           | 301 | 49.59 |
| ≥40                             | 80  | 13.18 |
| <b>Religion</b>                 |     |       |
| Orthodox                        | 486 | 80.07 |
| Muslim                          | 69  | 11.37 |
| Protestant                      | 52  | 8.57  |
| <b>Marital status</b>           |     |       |
| Single                          | 245 | 40.36 |
| Married                         | 362 | 59.64 |
| <b>Educational status</b>       |     |       |
| Bachelor                        | 94  | 15.49 |
| Master                          | 416 | 68.53 |
| Ph.D.                           | 97  | 15.98 |
| <b>Work experience in years</b> |     |       |
| ≤5                              | 167 | 27.51 |
| 6-10                            | 249 | 41.02 |
| >10                             | 191 | 31.47 |
| <b>Monthly salary (ETB)</b>     |     |       |
| <10 000                         | 99  | 16.31 |
| 10 000-13 000                   | 331 | 54.53 |
| >13 000                         | 177 | 29.16 |

248 **Key:** ETB= Ethiopian Birr (currency)

### 249 **Behavioral and psychosocial characteristics of study participants**

250 Among the study participants, 414 (68.20%) of respondents were working between 6 and 10 hrs  
 251 per day and 79 (13.01%) of respondents were working for more than 10 hrs per day. Of the study  
 252 participants, 108 (17.79%) of them reported they were cigarette smokers. Whereas, 112 (18.45)  
 253 stated they had alcohol drinking habits and almost one-third (33.28%) of them conveyed they were  
 254 performing physical exercise at least two times per week. Majority of the respondents, 434  
 255 (71.50%) a normal (18.5–24.9 kg/m<sup>2</sup>) BMI and 48 (7.91%) of them underweight (>18.5 kg/m<sup>2</sup>).

256 Out of the study participants, 188 (30.97%) of them clarified that they had a chronic illness, and  
 257 almost half (51.24%) of the study participants have used an electronic device before bedtime.  
 258 Regarding psychosocial characteristics, nearly one-fourth (24.38%) of respondents had high-risk  
 259 perceptions of the COVID-19 virus. Meanwhile, 516 (85.01%) of respondents explained that they  
 260 were satisfied with their job. Regarding job stress, 276 (45.47%) of the respondents stated they  
 261 perceived stress due to their jobs (**Table 2**).

262 **Table 2:** Behavioral and psychosocial characteristics of academic staff in the University of  
 263 Gondar, Ethiopia, 2021 (N=607).

| Variables                        | Frequency (n) | Percent (%) |
|----------------------------------|---------------|-------------|
| <b>Working hours per day</b>     |               |             |
| ≤5hr                             | 114           | 18.78       |
| 6-10hr                           | 414           | 68.20       |
| >10hr                            | 79            | 13.01       |
| <b>Cigarette smoker</b>          |               |             |
| Yes                              | 108           | 17.79       |
| No                               | 499           | 82.21       |
| <b>Alcohol consumption habit</b> |               |             |
| Yes                              | 112           | 18.45       |
| No                               | 495           | 81.55       |
| <b>Khat chewing behavior</b>     |               |             |
| Yes                              | 19            | 3.13        |
| No                               | 588           | 96.87       |
| <b>Physical exercise</b>         |               |             |
| Yes                              | 202           | 33.28       |
| No                               | 405           | 66.72       |
| <b>Body mass index (BMI)</b>     |               |             |
| Underweight                      | 48            | 7.91        |
| Normal                           | 434           | 71.50       |
| Overweight and obese             | 125           | 20.59       |
| <b>Chronic Illness</b>           |               |             |
| Yes                              | 188           | 30.97       |
| No                               | 419           | 69.03       |

**The habit of taking breaks**

|     |     |       |
|-----|-----|-------|
| Yes | 329 | 54.20 |
| No  | 278 | 45.80 |

**Electronic device use**

|     |     |       |
|-----|-----|-------|
| Yes | 311 | 51.24 |
| No  | 296 | 48.76 |

**Risk perception towards COVID-19 virus**

|      |     |       |
|------|-----|-------|
| High | 148 | 24.38 |
| Low  | 459 | 75.62 |

**Colleagues relationship**

|      |     |       |
|------|-----|-------|
| Good | 539 | 88.80 |
| Poor | 68  | 11.20 |

**Job satisfaction**

|               |     |       |
|---------------|-----|-------|
| Satisfied     | 516 | 85.01 |
| Not satisfied | 91  | 14.99 |

**Perceived job stress**

|              |     |       |
|--------------|-----|-------|
| Stressed     | 276 | 45.47 |
| Not stressed | 331 | 54.53 |

**Workload**

|     |     |       |
|-----|-----|-------|
| Yes | 506 | 83.36 |
| No  | 101 | 16.64 |

264

**265 Prevalence of poor sleep quality and its components scores**

266 The mean global score of PSQI (computed using the component scores) was 6.80, 95% CI (6.55,  
 267 7.04). The result of this study revealed that 60.30% (95% CI, 56.28%-64.21%) of academicians  
 268 were classified as having poor sleep quality. Seven components of sleep quality in the present  
 269 study were assessed and identified their sleep status. Accordingly, 514 (84.68%) of academicians  
 270 had fairly good to very good sleep perception. From the total study participants, 342 (56.34%) had  
 271 mild difficulty in falling asleep (PSQI latency). Regarding sleeping duration, only 165 (27.18%)  
 272 of respondents had more than 7 hours of sleep per night, and 326 (53.71%) had a very high habitual  
 273 sleep efficiency (>85%). Moreover, most (66.39%) of academicians reported that they had mild  
 274 difficulty in the PSQI disturbance domain and only 39 (6.42%) of them used sleep medication to

275 sleep during the past month. Furthermore, 196 (32.29%) of them had mild to severe difficulty in  
 276 PSQI day dysfunction due to sleepiness in the past month (**Table 3**).

277 **Table 3:** Sleep quality and its components scores of academic staff in the University of Gondar,  
 278 Ethiopia, 2021 (N=607).

| Variables                             | Frequency (n) | Percent (%) |
|---------------------------------------|---------------|-------------|
| <b>Sleep perception</b>               |               |             |
| Very good                             | 265           | 43.66       |
| Fairly good                           | 249           | 41.02       |
| Fairly bad                            | 80            | 13.18       |
| Very bad                              | 13            | 2.14        |
| <b>Sleep latency (falling asleep)</b> |               |             |
| 0 to 15minutes (0)                    | 27            | 4.45        |
| 16 to 30 minutes (1)                  | 342           | 56.34       |
| 31 to 60 minutes (2)                  | 161           | 26.52       |
| >60 minutes (3)                       | 77            | 12.69       |
| <b>Sleep duration</b>                 |               |             |
| >7hrs (0)                             | 165           | 27.18       |
| 6h to 7hrs (1)                        | 148           | 24.38       |
| < 6hrs (2 & 3)                        | 294           | 48.43       |
| <b>Sleep efficiency</b>               |               |             |
| >85% (0)                              | 326           | 53.71       |
| 75% to 84% (1)                        | 143           | 23.56       |
| 65% to 74% (2)                        | 60            | 9.88        |
| <65% (3)                              | 78            | 12.85       |
| <b>Sleep disturbance</b>              |               |             |
| Never (0)                             | 116           | 19.11       |
| 1 time a week (1)                     | 403           | 66.39       |
| 1–2 times a week (2)                  | 84            | 13.84       |
| ≥3 times a week (3)                   | 4             | 0.66        |
| <b>Used sleep medication</b>          |               |             |
| Never (0)                             | 568           | 93.57       |
| 1 time a week (1)                     | 27            | 4.45        |
| 1–2 times a week (2)                  | 7             | 1.15        |



|                                |     |       |
|--------------------------------|-----|-------|
| ≥3 times a week (3)            | 5   | 0.82  |
| <b>Daytime dysfunction</b>     |     |       |
| No problem (0)                 | 411 | 67.71 |
| 1 time a week (1)              | 143 | 23.56 |
| 1–2 times a week (2)           | 44  | 7.25  |
| ≥3 times a week (3)            | 9   | 1.48  |
| <b>Total PSQI Global score</b> |     |       |
| ≤ 5 (Good sleep quality)       | 241 | 39.70 |
| > 5 (Poor sleep quality)       | 366 | 60.30 |

279 **Key:** 0= No difficulty, 1=Mild difficulty, 2=Moderate difficulty, 3=Sever difficulty

280

### 281 **Factors associated with poor sleep quality**

282 In bivariable binary logistic regression analysis, sex (p-value of 0.124), educational status (p-value  
 283 of 0.179), working hours per day (p-value of 0.003), khat chewing (p-value of 0.042), not perform  
 284 physical activities (p-value of 0.122), electronic devise use (p-value of 0.004), chronic illness (p-  
 285 value of 0.002), risk perception towards COVID-19 virus (p-value of 0.005), job dissatisfaction  
 286 (p-value of 0.112), and perceived job stress (p-value of ≤0.001) were the factors associated with  
 287 poor sleep quality. However, after controlling for confounding variables in multivariable binary  
 288 logistic regression analysis, only working hours per day, electronic device use before bedtime, risk  
 289 perception towards COVID-19 infection, and perceived job stress remained to have a significant  
 290 association with poor sleep quality.

291 The probability of developing poor sleep quality was 2.19 times greater in employees who worked  
 292 more than 10 hours per day compared to those who worked for 5 hours or less per day [AOR=  
 293 2.19, 95% CI (1.16, 4.27)] at a p-value of 0.019. Similarly, participants who use electronic devices  
 294 before bedtime were 1.53 times more likely to experience poor sleep quality compared to  
 295 electronic device non-user counterparts [AOR=1.53, 95% CI (1.04, 2.27)] at a p-value of 0.031.  
 296 Moreover, the odds of having poor sleep quality were 1.60 times more likely among workers who  
 297 had a high-risk perception of COVID-19 infection than among those who had a low-risk perception  
 298 about it [AOR =1.60, 95% CI (1.04, 2.46)] at a p-value of 0.032. Finally, the chances of suffering  
 299 from poor sleep quality among academicians who had perceived job stress were 2.15 times higher

300 as compared to those who had no job stress [AOR = 2.15 (95% CI, (1.50, 3.08)] at a p-value of  
301  $\leq 0.01$  as shown in (Table 4).

302 **Table 4:** Bivariable and multivariable logistic regression analysis of factors associated with poor  
303 sleep quality among academic staff, University of Gondar, Ethiopia, 2021 (N=607).

| Variables                                | Poor sleep quality |     | COR with 95% CI   | AOR with 95% CI          | P-value      |
|------------------------------------------|--------------------|-----|-------------------|--------------------------|--------------|
|                                          | Yes                | No  |                   |                          |              |
| <b>Sex</b>                               |                    |     |                   |                          |              |
| Male                                     | 256                | 180 | 1                 | 1                        |              |
| Female                                   | 110                | 61  | 1.27 (0.88-1.83)  | 1.42 (.94-2.13)          | 0.091        |
| <b>Educational status</b>                |                    |     |                   |                          |              |
| Bachelor                                 | 62                 | 32  | 1                 | 1                        |              |
| Master                                   | 243                | 173 | 0.72 (0.45-1.16)  | 0.74 (0.44-1.23)         | 0.245        |
| Ph.D.                                    | 61                 | 36  | 0.87 (0.48-1.58)  | 0.87 (0.46-1.65)         | 0.674        |
| <b>Working hours per day</b>             |                    |     |                   |                          |              |
| $\leq 5$ hr                              | 59                 | 55  | 1                 | 1                        |              |
| 6-10hr                                   | 249                | 165 | 1.41 (0.93- 2.13) | 1.10 (0.76-1.85)         | 0.679        |
| $>10$ hr                                 | 58                 | 21  | 2.57 (1.39-4.78)  | <b>2.19 (1.16-4.27)*</b> | <b>0.019</b> |
| <b>Khat chewing</b>                      |                    |     |                   |                          |              |
| Yes                                      | 16                 | 3   | 3.63 (1.05-12.58) | 3.00 (0.82-11.00)        | 0.097        |
| No                                       | 350                | 238 | 1                 | 1                        |              |
| <b>Physical exercise</b>                 |                    |     |                   |                          |              |
| Yes                                      | 113                | 89  | 1                 | 1                        |              |
| No                                       | 253                | 152 | 1.31 (0.93-1.85)  | 1.40 (0.97-2.03)         | 0.068        |
| <b>Electronic device use</b>             |                    |     |                   |                          |              |
| Yes                                      | 205                | 106 | 1.62 (1.17-2.25)  | <b>1.53 (1.04-2.27)*</b> | <b>0.031</b> |
| No                                       | 161                | 135 | 1                 | 1                        |              |
| <b>Chronic illness</b>                   |                    |     |                   |                          |              |
| Yes                                      | 131                | 57  | 1.80 (1.25-2.59)  | 1.45 (0.98-1.99)         | 0.059        |
| No                                       | 235                | 184 | 1                 | 1                        |              |
| <b>Risk perception of COVID-19 virus</b> |                    |     |                   |                          |              |
| High                                     | 104                | 44  | 1.77 (1.19-2.65)  | <b>1.60 (1.04-2.46)*</b> | <b>0.032</b> |
| Low                                      | 262                | 197 | 1                 | 1                        |              |
| <b>Job satisfaction</b>                  |                    |     |                   |                          |              |

|                             |     |     |                  |                         |              |
|-----------------------------|-----|-----|------------------|-------------------------|--------------|
| Satisfied                   | 318 | 198 | 1                | 1                       |              |
| Not satisfied               | 48  | 43  | 0.70 (0.44-1.09) | 0.67 (0.42-1.08)        | 0.099        |
| <b>Perceived job stress</b> |     |     |                  |                         |              |
| Stressed                    | 197 | 79  | 2.39 (1.70-3.35) | <b>2.15(1.50-3.08)*</b> | <b>≤0.01</b> |
| Not stressed                | 169 | 162 | 1                | 1                       |              |

**Keys:** 1=reference category, AOR=adjusted odds ratio, CI= confidence interval, COR=crudes odds ratio, COVID-19= Corona virus disease 19, \*= significant at  $p < 0.05$  in multivariable logistic regression analysis, Hosmer and Lemeshow test  $p = 0.650$ .

## Discussion

Poor sleep quality incurs substantial health, economic and societal costs. Understanding the magnitude and various factors linked to the ailment would help researchers identify viable therapies to improve sleep quality in vulnerable populations. The higher education work environment is characterized by a highly competitive work nature. In Ethiopia, University teaching staff usually handle extracurricular tasks including conducting and preparing research for publication, providing community services, and managing administrative positions. Furthermore, their regular teaching activities shift from face-to-face to online instruction during the COVID-19 pandemic, which has an impact on their sleep quality. Understanding the magnitude and investigating etiologies of the condition plays a paramount role to establish effective prevention and control strategies. To our knowledge, the current study is the first to assess the prevalence and risk factors of poor sleep quality among university academic staff in Ethiopia. The prevalence of poor sleep quality in the last one- month was found to be 60.30% with 95% CI (56.28-64.21). Working for more than 10 hours per day, electronic device use before bedtime, high-risk perception of COVID-19 infection, and having job stress were factors positively associated with poor sleep quality in the current study.

Two investigations from Brazil (57.9%) [64] and (61.3%) [7] supported the current data. This agreement could be due to the nature of tasks in the academic environment including roles related to teaching and research activities usually resemble in every higher academic institution. Participants in those nations might be also obliged to work in a substandard workplace in an

1  
2  
3 329 unhealthy manner for prolonged periods, and fewer individuals are aware of sleep health and the  
4 330 effect of poor sleep quality. The other possible explanation might be due to study participants  
5 331 having a similar age group as compared to those countries.

6  
7  
8  
9 332 On the contrary, the current study had a higher magnitude compared to the studies conducted in  
10 333 Turkey (38.9%) [8] and Malaysia (45%) [65]. This difference might be due to the unstable  
11 334 socioeconomic status of the respondents in this study. The respondents in this study might be an  
12 335 attempt to compensate for their low salaries by teaching different shifts at multiple colleges and  
13 336 schools. This may lead to longer working hours because they start their daily work activities much  
14 337 earlier in the day and conclude their working day much later. The difference might be also due to  
15 338 the sample size variation; previous reports were conducted among a small number of study  
16 339 participants compared to this study group. The other possible justifications for the difference might  
17 340 be due to variation in the educational system, study setting, workload, and cultural differences  
18 341 between Ethiopia and those countries.

19  
20  
21  
22  
23  
24  
25  
26 342 There were no studies reports with a larger magnitude than the current finding. A possible reason  
27 343 for increased magnitude of sleep problems in the current study could be due to the study period,  
28 344 we conducted during the early phase of the COVID-19 pandemic. Higher education institutions  
29 345 need to look for alternate educational strategies to be adopted during the COVID-19 pandemic and  
30 346 the e-learning strategy emerged as an alternative solution to continued education. The educational  
31 347 institutions started using different educational platforms like Google classroom, Zoom, and  
32 348 Microsoft teams. Lecturers were subjected to excessive use of digital devices without breaks as  
33 349 they were shifted to online teaching. There has also been increased digitalization for recreational  
34 350 purposes. Hence, it was noted as exposure to light emitted from digital devices has been interfering  
35 351 with the circadian regulation/melatonin rhythm [42, 66], which may lead to poor sleep quality.

36  
37  
38  
39  
40  
41  
42  
43  
44 352 In this study long working hour per day (>10hrs/day) was significantly associated with poor sleep  
45 353 quality. The finding echoes the result of previous investigations [4, 67]. A possible justification  
46 354 for this report may be that employee with long working hours need more time to recover from  
47 355 work-induced fatigue [68]. However, long working hours reduces the amount of private time  
48 356 available to them, which may lead to sleep deprivation [69]. For recovery from fatigue, not only  
49 357 sleep but also relaxation is needed, for example, spending time with family and friends, resting, or  
50 358 reading, but long working hours may also reduce relaxation time [70]. Therefore, reduced private

1  
2  
3 359 time for workers due to long working hours may lead to sleeplessness, and cause sleep disorders.  
4  
5 360 Also, due to the nature of their occupation, our study participants spend a lot of time working with  
6  
7 361 computers and other electronic devices. The use of electronic devices for a long period was noted  
8  
9 362 to be associated with sleep disorders [42, 71]. Another plausible explanation might be that  
10  
11 363 employees who worked long working hours may take caffeinated drinks (e.g., coffee and tea),  
12  
13 364 which can lead to poor sleep [72].

14 365 Electronic device use before bedtime showed a significant association with poor sleep quality.  
15  
16 366 Similar results were reported from other studies [73-75]. This could be reasoned as sleep quantity  
17  
18 367 and quality are significantly reduced when people use digital devices for an extended period [76].  
19  
20 368 For example, cell phones, tablets, readers, computers, and laptops emit short-wavelength enriched  
21  
22 369 light, which has been found to suppress or delay the normal generation of melatonin in the evening  
23  
24 370 and minimize feelings of sleepiness [77]. Moreover, workforces in a higher education context are  
25  
26 371 often confronted with demanding responsibilities requiring work overload, long working hours,  
27  
28 372 stress, and, in addition, the COVID-19 pandemic difficulties in the world of education. Because of  
29  
30 373 the pandemic, universities were forced to conduct all of their activities online, including in the  
31  
32 374 current study setting, which increased the usage of electronic devices, contributing to or  
33  
34 375 exacerbating poor sleep quality [78].

35 376 Our current study revealed a high-risk perception of COVID-19 infections was found to be a  
36  
37 377 determinant factor of poor sleep quality. This finding is in concordance with other research reports  
38  
39 378 [79, 80]. This could be explained as those people who thought they were at a higher risk of  
40  
41 379 developing COVID-19 had more fear than those who thought they were at a lower risk. Fear and  
42  
43 380 rumination were also found to be adversely related to sleep quality, indicating that fear of infection  
44  
45 381 and rumination did lead to poor sleep quality during the pandemic, which contribute to poorer  
46  
47 382 sleep quality both directly and indirectly by increasing fear [79]. Several researchers had examined  
48  
49 383 the influence of the COVID-19 pandemic on mental health, concluding that persons who are  
50  
51 384 fearful of becoming infected are more likely to develop sleeping disturbances [81].

52 385 Participants who reported having job stress were 2.38 times more likely to have poor sleep quality  
53  
54 386 than those who did not have stress. The result is in agreement with the studies conducted in Brazil  
55  
56 387 [64], Malaysia [4, 82], and Indonesia [83]. The plausible reason might be due to the linkages  
57  
58 388 between sleep, stress regulation, and alteration in the hypothalamic-pituitary-adrenal axis

1  
2  
3 389 implication of psychopathology and sleep-wake cycle. Job stress can lead to the release of an  
4  
5 390 excessive level of glucocorticoids hormones like cortisol. A higher level of cortisol during stressful  
6  
7 391 life events primes to sleep rhythm disruption that results in sleep deprivation [84, 85].

## 8 9 392 **Conclusion**

10  
11 393 This study disclosed that poor sleep quality was intrusive during the COVID-19 pandemic among  
12  
13 394 University teaching staff in Ethiopia, with two-thirds of our study participants having experienced  
14  
15 395 poor sleep quality. Poor sleep quality was related to working hours per day, electronic device use,  
16  
17 396 the risk of COVID-19 infections, and job stress in the current study. Therefore, we recommended  
18  
19 397 that University administrators to develop, implement, and evaluate sleep health promotion  
20  
21 398 programs in the workplaces. Moreover, strategy and structure to limit working for an extended  
22  
23 399 period every day, and improve proper usage of electronic devices should be integrated with sleep  
24  
25 400 health promotion programs to minimize the condition.

## 25 401 **Data availability statement**

26  
27 402 Individual participant data after deidentification that underlie the results reported in this article will  
28  
29 403 be made available upon requesting the primary author immediately following publication.

## 30 404 **Author's contribution**

31  
32 405 **AHT:** Initiated the concept of the research, wrote up the research proposal, analyzed the data  
33  
34 406 involved in the presentation and interpretation process of results and discussions, and drafted the  
35  
36 407 manuscript document and the corresponding author. The author read and approved the final  
37  
38 408 manuscript.

## 39 409 **Funding information**

40  
41 410 The authors of this study didn't receive funds from any funding organization. The cost of data  
42  
43 411 collection tools and data collectors' fee was covered by the principal investigator, i.e., AHT.

## 44 412 **Patient and public involvement**

45  
46 413 There was no patient or public involvement in the study.

## 47 414 **Competing interest**

48  
49 415 None of the authors have any competing interests in the manuscript.

1  
2  
3 416 **Acknowledgments**  
4

5 417 We are very much thankful to all data collectors, supervisors, and study participants for  
6  
7 418 coordination of the study.  
8

9 419 **Ethics approval and consent to participate**  
10

11 420 Ethical approval was secured from the Institutional Ethical Review Board (IRB) of the University  
12  
13 421 of Gondar, College of Medicine and Health Sciences, Institute of Public Health (**Reference #:**  
14  
15 422 **IPH/1425/2021**). The study followed the tenets of the Declaration of Helsinki and also complied  
16  
17 423 with the ethical requirements set by the University of Gondar. Written informed consent was  
18  
19 424 obtained from each respondent before commencing data collection after an explanation of the  
20  
21 425 nature and possible consequences of the study. The information sheet that clearly shows the  
22  
23 426 research topic, the objectives of the study, confidentiality of the participant's responses, the study  
24  
25 427 benefits, and associated risks was prepared and presented. We removed any personal identifiers to  
26  
27 428 assure confidentiality of the participants and only anonymous data were used for interpretations.  
28  
29 429 Furthermore, since the data were collected during the COVID-19 pandemic, we implemented  
30  
31 430 infection prevention protocols including social distancing and wearing of face masks.  
32

33 431

34 432

35 433

36 434

37 435

38 436

39 437

40 438

41 439

42 440

43 441

44 442  
45  
46  
47  
48  
49  
50  
51  
52  
53  
54  
55  
56  
57  
58  
59  
60

443 **References**

- 444 1. Landry GJ, Best JR, Liu-Ambrose T: **Measuring sleep quality in older adults: a comparison**  
 445 **using subjective and objective methods.** *Frontiers in aging neuroscience* 2015, 7:166.
- 446 2. Buysse DJ, Reynolds III CF, Monk TH, Berman SR, Kupfer DJ: **The Pittsburgh Sleep Quality**  
 447 **Index: a new instrument for psychiatric practice and research.** *Psychiatry research* 1989,  
 448 **28(2):193-213.**
- 449 3. Kline C: **Sleep Quality.** In: *Encyclopedia of Behavioral Medicine.* edn. Edited by Gellman MD,  
 450 Turner JR. New York, NY: Springer New York; 2013: 1811-1813.
- 451 4. Musa NA, Moy FM, Wong LP: **Prevalence and factors associated with poor sleep quality**  
 452 **among secondary school teachers in a developing country.** *Industrial health* 2018.
- 453 5. Souza JcD, Sousa ICd, Belísio AS, Azevedo CVMd: **Sleep habits, daytime sleepiness and sleep**  
 454 **quality of high school teachers.** *Psychology & Neuroscience* 2012, 5:257-263.
- 455 6. Kottwitz MU, Gerhardt C, Pereira D, Iseli L, Elfering A: **Teacher's sleep quality: linked to social**  
 456 **job characteristics?** *Industrial health* 2017.
- 457 7. Freitas AMC, Araújo Tmd, Pinho PdS, Sousa CC, Oliveira PCS, Souza FdO: **Sleep quality and**  
 458 **associated factors among professors.** *Revista Brasileira de Saúde Ocupacional* 2021, 46.
- 459 8. Teker AG, Luleci NE: **Sleep quality and anxiety level in employees.** *Northern clinics of Istanbul*  
 460 **2018, 5(1):31.**
- 461 9. Burdorf A, Porru F, Rugulies R: **The COVID-19 (Coronavirus) pandemic: consequences for**  
 462 **occupational health.** *Scandinavian Journal of Work, Environment & Health* 2020, 46(3):229-230.
- 463 10. Stranges S, Tigbe W, Gómez-Olivé FX, Thorogood M, Kandala N-B: **Sleep problems: an**  
 464 **emerging global epidemic? Findings from the INDEPTH WHO-SAGE study among more**  
 465 **than 40,000 older adults from 8 countries across Africa and Asia.** *Sleep* 2012, 35(8):1173-1181.
- 466 11. Huang Y, Zhao N: **Generalized anxiety disorder, depressive symptoms and sleep quality**  
 467 **during COVID-19 outbreak in China: a web-based cross-sectional survey.** *Psychiatry research*  
 468 **2020, 288:112954.**
- 469 12. Gualano MR, Lo Moro G, Voglino G, Bert F, Siliquini R: **Effects of Covid-19 lockdown on**  
 470 **mental health and sleep disturbances in Italy.** *International journal of environmental research*  
 471 *and public health* 2020, 17(13):4779.
- 472 13. Marelli S, Castelnuovo A, Somma A, Castronovo V, Mombelli S, Bottoni D, Leitner C, Fossati A,  
 473 Ferini-Strambi L: **Impact of COVID-19 lockdown on sleep quality in university students and**  
 474 **administration staff.** *Journal of Neurology* 2021, 268(1):8-15.
- 475 14. Dowla SU: **Evaluating the effects of COVID-19 on mental health.** Brac University; 2021.
- 476 15. Rwigema P: **Impact of COVID-19 lockdowns on the education sector. The case of Rwanda.**  
 477 *The Strategic Journal of Business & Change Management* 2021, 8(1):150-169.
- 478 16. Salehinejad MA, Majidinezhad M, Ghanavati E, Kouestanian S, Vicario CM, Nitsche MA, Nejati  
 479 V: **Negative impact of COVID-19 pandemic on sleep quantitative parameters, quality, and**  
 480 **circadian alignment: implications for health and psychological well-being.** *EXCLI journal*  
 481 **2020, 19:1297.**
- 482 17. Crepaldi T, Carvalhais J, Cotrim T: **Sleep Quality and Quality of Working Life Among**  
 483 **Brazilian University Professors in Telework.** In: *Occupational and Environmental Safety and*  
 484 *Health III.* edn. Edited by Arezes PM, Baptista JS, Carneiro P, Castelo Branco J, Costa N, Duarte  
 485 J, Guedes JC, Melo RB, Miguel AS, Perestrelo G. Cham: Springer International Publishing; 2022:  
 486 661-669.
- 487 18. **Sleep-RSPH, Availbel at: <https://www.rsph.org.uk/our-work/policy/wellbeing/sleep.html>**
- 488 19. Colten HR, Altevogt BM: **Extent and health consequences of chronic sleep loss and sleep**  
 489 **disorders.** *Sleep disorders and sleep deprivation: an unmet public health problem* 2006:55-135.



- 1  
2  
3 490 20. Ohayon M, Wickwire EM, Hirshkowitz M, Albert SM, Avidan A, Daly FJ, Dauvilliers Y, Ferri R,  
4 491 Fung C, Gozal D: **National Sleep Foundation's sleep quality recommendations: first report.**  
5 492 *Sleep health* 2017, **3**(1):6-19.
- 6 493 21. Organization WH: **WHO technical meeting on sleep and health: Bonn Germany, 22–24**  
7 494 **January 2004.** In.: World Health Organization. Regional Office for Europe; 2004.
- 8 495 22. Mullington JM, Haack M, Toth M, Serrador JM, Meier-Ewert HK: **Cardiovascular,**  
9 496 **inflammatory, and metabolic consequences of sleep deprivation.** *Progress in cardiovascular*  
10 497 *diseases* 2009, **51**(4):294-302.
- 11 498 23. Yoo H, Franke WD: **Sleep habits, mental health, and the metabolic syndrome in law**  
12 499 **enforcement officers.** *Journal of occupational and environmental medicine* 2013, **55**(1):99-103.
- 13 500 24. Slagter SN, van Vliet-Ostaptchouk JV, van Beek AP, Keers JC, Lutgers HL, van der Klauw MM,  
14 501 Wolffebuttel BH: **Health-related quality of life in relation to obesity grade, type 2 diabetes,**  
15 502 **metabolic syndrome and inflammation.** *PloS one* 2015, **10**(10):e0140599.
- 16 503 25. Hung H-C, Yang Y-C, Ou H-Y, Wu J-S, Lu F-H, Chang C-J: **The association between self-**  
17 504 **reported sleep quality and metabolic syndrome.** *PloS one* 2013, **8**(1):e54304.
- 18 505 26. Rosekind MR, Gregory KB, Mallis MM, Brandt SL, Seal B, Lerner D: **The cost of poor sleep:**  
19 506 **workplace productivity loss and associated costs.** *Journal of Occupational and Environmental*  
20 507 *Medicine* 2010, **52**(1):91-98.
- 21 508 27. Dumith SC, Meneghini KFD, Demenech LM: **Who are the individuals with the worst perceived**  
22 509 **quality of sleep? A population-based survey in southern Brazil.** *Preventive Medicine Reports*  
23 510 2021, **21**:101288.
- 24 511 28. Adams R, Appleton S, Taylor A, McEvoy D, Antic N: **Report to the sleep Health Foundation**  
25 512 **2016 sleep health survey of Australian adults.** *Adelaide: The Adelaide Institute for Sleep Health*  
26 513 *& The University of Adelaide* 2016.
- 27 514 29. Watson N, Badr M, Belenky G, Bliwise D, Buxton O, Buysse D, Dinges D, Gangwisch J, Grandner  
28 515 M, Kushida C: **Consensus Conference Panel Non-Participating Observers American Academy**  
29 516 **of Sleep Medicine Staff (2015) Recommended amount of sleep for a healthy adult: a joint**  
30 517 **consensus statement of the American Academy of Sleep Medicine and Sleep Research Society.**  
31 518 *J Clin Sleep Med*, **11**:591-592.
- 32 519 30. Roth T: **Insomnia: definition, prevalence, etiology, and consequences.** *J Clin Sleep Med* 2007,  
33 520 **3**(5 Suppl):S7-10.
- 34 521 31. Baker FC, Wolfson AR, Lee KA: **Association of sociodemographic, lifestyle, and health factors**  
35 522 **with sleep quality and daytime sleepiness in women: findings from the 2007 National Sleep**  
36 523 **Foundation “Sleep in America Poll”.** *Journal of women's health* 2009, **18**(6):841-849.
- 37 524 32. Gellis LA, Lichstein KL, Scarinci IC, Durrence HH, Taylor DJ, Bush AJ, Riedel BW: **Socioeconomic**  
38 525 **status and insomnia.** *Journal of abnormal psychology* 2005, **114**(1):111.
- 39 526 33. Ding D, Gebel K, Phongsavan P, Bauman AE, Merom D: **Driving: a road to unhealthy lifestyles**  
40 527 **and poor health outcomes.** *PloS one* 2014, **9**(6):e94602.
- 41 528 34. Kabrita CS, Hajjar-Muça TA, Duffy JF: **Predictors of poor sleep quality among Lebanese**  
42 529 **university students: association between evening typology, lifestyle behaviors, and sleep**  
43 530 **habits.** *Nature and science of sleep* 2014, **6**:11.
- 44 531 35. Shochat T: **Impact of lifestyle and technology developments on sleep.** *Nature and science of*  
45 532 *sleep* 2012, **4**:19.
- 46 533 36. Alonzo R, Hussain J, Stranges S, Anderson KK: **Interplay between social media use, sleep**  
47 534 **quality, and mental health in youth: A systematic review.** *Sleep Medicine Reviews* 2021,  
48 535 **56**:101414.
- 49 536 37. Amschler DH, McKenzie JF: **Perceived sleepiness, sleep habits and sleep concerns of public**  
50 537 **school teachers, administrators and other personnel.** *American Journal of Health Education*  
51 538 2010, **41**(2):102-109.

- 1  
2  
3 539 38. Alemayehu M, Nega A, Tegegne E, Mule Y: **Prevalence of self reported computer vision syndrome and associated factors among secretaries and data processors who are working in University of Gondar, Ethiopia.** *Journal of Biology, Agriculture and Healthcare* 2014, **4**(15).
- 4 540  
5 541  
6 542 39. Kabito GG, Wami SD, Chercos DH, Mekonnen TH: **Work-related Stress and Associated Factors among Academic Staffs at the University of Gondar, Northwest Ethiopia: An Institutionbased Cross-sectional Study.** *Ethiopian journal of health sciences* 2020, **30**(2).
- 7 543  
8 544  
9 545 40. Daniel WW, Cross CL: **Biostatistics: a foundation for analysis in the health sciences:** Wiley; 2018.
- 10 546  
11 547 41. Martínez-Mesa J, González-Chica DA, Bastos JL, Bonamigo RR, Duquia RP: **Sample size: how many participants do I need in my research?** *Anais brasileiros de dermatologia* 2014, **89**:609-615.
- 12 548  
13 549  
14 550 42. Patil A, Bhavya SC, Srivastava S: **Eyeing computer vision syndrome: Awareness, knowledge, and its impact on sleep quality among medical students.** *Industrial psychiatry journal* 2019, **28**(1):68.
- 15 551  
16 552  
17 553 43. Salahuddin M, Maru TT, Kumalo A, Pandi-Perumal SR, Bahammam AS, Manzar MD: **Validation of the Pittsburgh sleep quality index in community dwelling Ethiopian adults.** *Health and quality of life outcomes* 2017, **15**(1):1-7.
- 18 554  
19 555  
20 556 44. Seidell JC, Flegal KM: **Assessing obesity: classification and epidemiology.** *British medical bulletin* 1997, **53**(2):238-252.
- 21 557  
22 558 45. Nakata A, Ikeda T, Takahashi M, Haratani T, Hojou M, Swanson NG, Fujioka Y, Araki S: **The prevalence and correlates of occupational injuries in small-scale manufacturing enterprises.** *Journal of occupational health* 2006, **48**(5):366-376.
- 23 559  
24 560  
25 561 46. Jemere T, Mossie A, Berhanu H, Yeshaw Y: **Poor sleep quality and its predictors among type 2 diabetes mellitus patients attending Jimma University Medical Center, Jimma, Ethiopia.** *BMC research notes* 2019, **12**(1):1-6.
- 26 562  
27 563  
28 564 47. Berhanu H, Mossie A, Tadesse S, Geleta D: **Prevalence and associated factors of sleep quality among adults in Jimma Town, Southwest Ethiopia: a community-based cross-sectional study.** *Sleep disorders* 2018, **2018**.
- 29 565  
30 566  
31 567 48. Rolander B, Bellner A-L: **Experience of musculo-skeletal disorders, intensity of pain, and general conditions in work--the case of employees in non-private dental clinics in a county in southern Sweden.** *Work* 2001, **17**(1):65-73.
- 32 568  
33 569  
34 570 49. Negussie BB, Emeria MS, Reta EY, Shiferaw BZ: **Sleep deprivation and associated factors among students of the Institute of Health in Jimma University, Southwest Ethiopia.** *Frontiers of Nursing*, **8**(3):303-311.
- 35 571  
36 572  
37 573 50. Abdu Z, Hajure M: **Prevalence and Associated Factors of Poor Quality of Sleep among Prisoners in Mettu Town Prison, Oromia, South West Ethiopia, 2019.** *The Open Public Health Journal* 2020, **13**(1).
- 38 574  
39 575  
40 576 51. Azene ZN, Merid MW, Muluneh AG, Geberu DM, Kassa GM, Yenit MK, Tilahun SY, Gelaye KA, Mekonnen HS, Azagew AW: **Adherence towards COVID-19 mitigation measures and its associated factors among Gondar City residents: A community-based cross-sectional study in Northwest Ethiopia.** *PloS one* 2020, **15**(12):e0244265.
- 41 577  
42 578  
43 579  
44 580 52. Macdonald S, MacIntyre P: **The generic job satisfaction scale: Scale development and its correlates.** *Employee Assistance Quarterly* 1997, **13**(2):1-16.
- 45 581  
46 582 53. The Marlin Company NH, CT, and the American Institute of Stress, Yonkers, NY.: **The Workplace Stress Scale™** Available at: <https://teorionline.files.wordpress.com/2011/04/unit-3-the-workplace-stress-scale.pdf>. Accessed on 10 June 2019.
- 47 583  
48 584  
49 585 54. Cohen S, Kamarck T, Mermelstein R: **Perceived stress scale.** *Measuring stress: A guide for health and social scientists* 1994, **10**(2):1-2.
- 50 586  
51 587 55. Birhanu TT, Salih MH, Abate HK: **Sleep Quality and Associated Factors Among Diabetes Mellitus Patients in a Follow-Up Clinic at the University of Gondar Comprehensive**
- 52 588  
53  
54  
55  
56  
57  
58  
59  
60

- 1  
2  
3 589 **Specialized Hospital in Gondar, Northwest Ethiopia: A Cross-Sectional Study.** *Diabetes, metabolic syndrome and obesity: targets and therapy* 2020, **13**:4859.
- 4 590
- 5 591 56. Wondie T, Molla A, Mulat H, Damene W, Bekele M, Madoro D, Yohannes K: **Magnitude and**
- 6 592 **correlates of sleep quality among undergraduate medical students in Ethiopia: cross-**
- 7 593 **sectional study.** *Sleep Science and Practice* 2021, **5**(1):1-8.
- 8 594 57. James BO, Omoaregba JO, Igberase OO: **Prevalence and correlates of poor sleep quality among**
- 9 595 **medical students at a Nigerian university.** *Ann Nigerian Med* 2011, **5**(1):1-5.
- 10 596 58. Deressa W, Worku A, Abebe W, Gizaw M, Amogne W: **Risk perceptions and preventive**
- 11 597 **practices of COVID-19 among healthcare professionals in public hospitals in Addis Ababa,**
- 12 598 **Ethiopia.** *PloS one* 2021, **16**(6):e0242471.
- 13 599 59. Mekonnen TH, Abere G, Olkeba SW: **Risk Factors Associated with Upper Extremity**
- 14 600 **Musculoskeletal Disorders among Barbers in Gondar Town, Northwest Ethiopia, 2018: A**
- 15 601 **Cross-Sectional Study.** *Pain Research and Management* 2019, **2019**(2019):1-9.
- 16 602 60. Mekonnen TH, Yenealem DG: **Factors affecting healthcare utilization for low back pain among**
- 17 603 **nurses in Gondar town, northwest Ethiopia, 2018: a cross-sectional study.** *BMC Res Notes*
- 18 604 2019, **12**(185):1-6.
- 19 605 61. Meaza H, Temesgen MH, Redae G, Hailemariam TT, Alamer A: **Prevalence of Musculoskeletal**
- 20 606 **Pain Among Academic Staff of Mekelle University, Ethiopia.** *Clinical Medicine Insights:*
- 21 607 *Arthritis and Musculoskeletal Disorders* 2020, **13**:1179544120974671.
- 22 608 62. Etana G, Ayele M, Abdissa D, Gerbi A: **Prevalence of Work Related Musculoskeletal Disorders**
- 23 609 **and Associated Factors Among Bank Staff in Jimma City, Southwest Ethiopia, 2019: An**
- 24 610 **Institution-Based Cross-Sectional Study.** *Journal of Pain Research* 2021, **14**:2071.
- 25 611 63. Hosmer DW, Hjort NL: **Goodness-of-fit processes for logistic regression: simulation results.**
- 26 612 *Statistics in medicine* 2002, **21**(18):2723-2738.
- 27 613 64. de Sousa AR, Santos RB, da Silva RM, Santos CCT, Lopes VC, Mussi FC: **Occupational stress**
- 28 614 **and sleep quality in professors of the health area.** *Rev Rene* 2018(19):60.
- 29 615 65. Farah NM, Saw Yee T, Mohd Rasdi HF: **Self-reported sleep quality using the Malay version of**
- 30 616 **the Pittsburgh sleep quality index (PSQI-M) in Malaysian adults.** *International journal of*
- 31 617 *environmental research and public health* 2019, **16**(23):4750.
- 32 618 66. Vandewalle G, Archer SN, Wuillaume C, Balteau E, Degueldre C, Luxen A, Dijk D-J, Maquet P: **Effects of light on cognitive brain responses depend on circadian phase and sleep homeostasis.**
- 33 619 *Journal of biological rhythms* 2011, **26**(3):249-259.
- 34 620 67. Virtanen M, Ferrie JE, Gimeno D, Vahtera J, Elovainio M, Singh-Manoux A, Marmot MG, Kivimäki M: **Long working hours and sleep disturbances: the Whitehall II prospective cohort study.** *Sleep* 2009, **32**(6):737-745.
- 35 621 68. Jansen N, Kant I, van Amelsvoort L, Nijhuis F, van den Brandt P: **Need for recovery from work: evaluating short-term effects of working hours, patterns and schedules.** *Ergonomics* 2003, **46**(7):664-680.
- 36 622 69. Bannai A, Ukawa S, Tamakoshi A: **Long working hours and sleep problems among public junior high school teachers in Japan.** *Journal of occupational health* 2015:15-0053-OA.
- 37 623 70. Ferrie J, Gimeno D, Vahtera J, Elovainio M, Singh-Manoux A, Marmot M, Kivimäki M: **Long working hours and sleep disturbances: the Whitehall II prospective cohort study.** *Virtanen M. SLEEP MEDICINE*:129.
- 38 624 71. Salehi SG, Hassani H, Mortezaipoor A, Sadeghniaat-Haghighi K: **Assessing of Sleepiness, Insomnia and Sleep Quality among University Students: Association between Computer Use and Sleep Quality.** *Annals of Military & Health Sciences Research*• Vol 2015, **13**(4).
- 39 625 72. O'Callaghan F, Muurlink O, Reid N: **Effects of caffeine on sleep quality and daytime functioning.** *Risk management and healthcare policy* 2018, **11**:263.
- 40 626 73. Byrd E: **The Effect of the Use of An Electronic Device Before Bed on Sleep Quality.** 2019.
- 41 627
- 42 628
- 43 629
- 44 630
- 45 631
- 46 632
- 47 633
- 48 634
- 49 635
- 50 636
- 51 637
- 52
- 53
- 54
- 55
- 56
- 57
- 58
- 59
- 60

- 1  
2  
3 638 74. Walsh NA, Rodriguez N, Repa LM, King E, Garland SN: **Associations between device use before**  
4 639 **bed, mood disturbance, and insomnia symptoms in young adults.** *Sleep Health* 2020, **6(6):822-**  
5 640 **827.**
- 6 641 75. Fossum IN, Nordnes LT, Storemark SS, Bjorvatn B, Pallesen S: **The association between use of**  
7 642 **electronic media in bed before going to sleep and insomnia symptoms, daytime sleepiness,**  
8 643 **morningness, and chronotype.** *Behavioral sleep medicine* 2014, **12(5):343-357.**
- 9 644 76. Salfi F, Amicucci G, Corigliano D, D'Atri A, Viselli L, Tempesta D, Ferrara M: **Changes of**  
10 645 **evening exposure to electronic devices during the COVID-19 lockdown affect the time course**  
11 646 **of sleep disturbances.** *Sleep* 2021, **44(9):zab080.**
- 12 647 77. Shechter A, Kim EW, St-Onge M-P, Westwood AJ: **Blocking nocturnal blue light for insomnia:**  
13 648 **A randomized controlled trial.** *J Psychiatr Res* 2018, **96:196-202.**
- 14 649 78. Sobaih AEE, Hasanein AM, Abu Elnasr AE: **Responses to COVID-19 in Higher Education:**  
15 650 **Social Media Usage for Sustaining Formal Academic Communication in Developing**  
16 651 **Countries.** *Sustainability* 2020, **12(16):6520.**
- 17 652 79. Lin S-Y, Chung KKH: **Risk Perception, Perception of Collective Efficacy and Sleep Quality in**  
18 653 **Chinese Adults during COVID-19 Pandemic in Hong Kong: A Cross-Sectional Study.**  
19 654 *International journal of environmental research and public health* 2021, **18(21):11533.**
- 20 655 80. Yan J, Kim S, Zhang SX, Foo M-D, Alvarez-Risco A, Del-Aguila-Arcentales S, Yáñez JA:  
21 656 **Hospitality workers' COVID-19 risk perception and depression: A contingent model based**  
22 657 **on transactional theory of stress model.** *International Journal of Hospitality Management* 2021,  
23 658 **95:102935.**
- 24 659 81. Iorga M, Iurcov R, Pop L-M: **The Relationship between Fear of Infection and Insomnia among**  
25 660 **Dentists from Oradea Metropolitan Area during the Outbreak of Sars-CoV-2 Pandemic.**  
26 661 *Journal of Clinical Medicine* 2021, **10(11):2494.**
- 27 662 82. Kesintha A, Rampal L, Sherina M, Kalaiselvam T: **Prevalence and predictors of poor sleep**  
28 663 **quality among secondary school students in Gombak District, Selangor.** *Med J Malaysia* 2018,  
29 664 **73(1):32-40.**
- 30 665 83. Herawati K, Gayatri D: **The correlation between sleep quality and levels of stress among**  
31 666 **students in Universitas Indonesia.** *Enfermeria clinica* 2019, **29:357-361.**
- 32 667 84. Hirotsu C, Tufik S, Andersen ML: **Interactions between sleep, stress, and metabolism: From**  
33 668 **physiological to pathological conditions.** *Sleep Science* 2015, **8(3):143-152.**
- 34 669 85. Han KS, Kim L, Shim I: **Stress and sleep disorder.** *Experimental neurobiology* 2012, **21(4):141.**

670

671

672

673

674

675

676

677

678

STROBE Statement—Checklist of items that should be included in reports of *cross-sectional studies*

|                           | Item No | Recommendation                                                                                                                                                                                               | Page No  |
|---------------------------|---------|--------------------------------------------------------------------------------------------------------------------------------------------------------------------------------------------------------------|----------|
| <b>Title and abstract</b> | 1       | (a) Indicate the study's design with a commonly used term in the title or the abstract                                                                                                                       | 2        |
|                           |         | (b) Provide in the abstract an informative and balanced summary of what was done and what was found                                                                                                          | 2        |
| <b>Introduction</b>       |         |                                                                                                                                                                                                              |          |
| Background/rationale      | 2       | Explain the scientific background and rationale for the investigation being reported                                                                                                                         | 3 to 4   |
| Objectives                | 3       | State specific objectives, including any prespecified hypotheses                                                                                                                                             | 4        |
| <b>Methods</b>            |         |                                                                                                                                                                                                              |          |
| Study design              | 4       | Present key elements of study design early in the paper                                                                                                                                                      | 5        |
| Setting                   | 5       | Describe the setting, locations, and relevant dates, including periods of recruitment, exposure, follow-up, and data collection                                                                              | 5        |
| Participants              | 6       | (a) Give the eligibility criteria, and the sources and methods of selection of participants                                                                                                                  | 5        |
| Variables                 | 7       | Clearly define all outcomes, exposures, predictors, potential confounders, and effect modifiers. Give diagnostic criteria, if applicable                                                                     | 7        |
| Data sources/measurement  | 8*      | For each variable of interest, give sources of data and details of methods of assessment (measurement). Describe comparability of assessment methods if there is more than one group                         | 7 to 8   |
| Bias                      | 9       | Describe any efforts to address potential sources of bias                                                                                                                                                    | 9        |
| Study size                | 10      | Explain how the study size was arrived at                                                                                                                                                                    |          |
| Quantitative variables    | 11      | Explain how quantitative variables were handled in the analyses. If applicable, describe which groupings were chosen and why                                                                                 |          |
| Statistical methods       | 12      | (a) Describe all statistical methods, including those used to control for confounding                                                                                                                        | 9        |
|                           |         | (b) Describe any methods used to examine subgroups and interactions                                                                                                                                          | 9        |
|                           |         | (c) Explain how missing data were addressed                                                                                                                                                                  |          |
|                           |         | (d) If applicable, describe analytical methods taking account of sampling strategy                                                                                                                           |          |
|                           |         | (e) Describe any sensitivity analyses                                                                                                                                                                        |          |
| <b>Results</b>            |         |                                                                                                                                                                                                              |          |
| Participants              | 13*     | (a) Report numbers of individuals at each stage of study—e.g. numbers potentially eligible, examined for eligibility, confirmed eligible, included in the study, completing follow-up, and analysed          | 5        |
|                           |         | (b) Give reasons for non-participation at each stage                                                                                                                                                         |          |
|                           |         | (c) Consider use of a flow diagram                                                                                                                                                                           |          |
| Descriptive data          | 14*     | (a) Give characteristics of study participants (e.g. demographic, clinical, social) and information on exposures and potential confounders                                                                   | 10 to 12 |
|                           |         | (b) Indicate number of participants with missing data for each variable of interest                                                                                                                          |          |
| Outcome data              | 15*     | Report numbers of outcome events or summary measures                                                                                                                                                         | 13       |
| Main results              | 16      | (a) Give unadjusted estimates and, if applicable, confounder-adjusted estimates and their precision (eg, 95% confidence interval). Make clear which confounders were adjusted for and why they were included | 9        |

|                          |    |                                                                                                                                                                            |    |
|--------------------------|----|----------------------------------------------------------------------------------------------------------------------------------------------------------------------------|----|
|                          |    | (b) Report category boundaries when continuous variables were categorized                                                                                                  |    |
|                          |    | (c) If relevant, consider translating estimates of relative risk into absolute risk for a meaningful time period                                                           |    |
| Other analyses           | 17 | Report other analyses done—eg analyses of subgroups and interactions, and sensitivity analyses                                                                             |    |
| <b>Discussion</b>        |    |                                                                                                                                                                            |    |
| Key results              | 18 | Summarise key results with reference to study objectives                                                                                                                   | 16 |
| Limitations              | 19 | Discuss limitations of the study, taking into account sources of potential bias or imprecision. Discuss both direction and magnitude of any potential bias                 | 3  |
| Interpretation           | 20 | Give a cautious overall interpretation of results considering objectives, limitations, multiplicity of analyses, results from similar studies, and other relevant evidence |    |
| Generalisability         | 21 | Discuss the generalisability (external validity) of the study results                                                                                                      |    |
| <b>Other information</b> |    |                                                                                                                                                                            |    |
| Funding                  | 22 | Give the source of funding and the role of the funders for the present study and, if applicable, for the original study on which the present article is based              | 20 |

\*Give information separately for exposed and unexposed groups.

**Note:** An Explanation and Elaboration article discusses each checklist item and gives methodological background and published examples of transparent reporting. The STROBE checklist is best used in conjunction with this article (freely available on the Web sites of PLoS Medicine at <http://www.plosmedicine.org/>, Annals of Internal Medicine at <http://www.annals.org/>, and Epidemiology at <http://www.epidem.com/>). Information on the STROBE Initiative is available at [www.strobe-statement.org](http://www.strobe-statement.org).

# BMJ Open

## Risk Factors for the Prevalence of Poor Sleep Quality in Lecturers During COVID-19 Pandemic in Ethiopia: an institution-based cross-sectional study

|                                 |                                                                                                                                         |
|---------------------------------|-----------------------------------------------------------------------------------------------------------------------------------------|
| Journal:                        | <i>BMJ Open</i>                                                                                                                         |
| Manuscript ID                   | bmjopen-2022-066024.R1                                                                                                                  |
| Article Type:                   | Original research                                                                                                                       |
| Date Submitted by the Author:   | 01-Sep-2022                                                                                                                             |
| Complete List of Authors:       | Hailu Tesfaye, Amensisa; University of Gondar College of Medicine and Health Sciences, Environmental and Occupational Health and Safety |
| <b>Primary Subject Heading</b>: | Public health                                                                                                                           |
| Secondary Subject Heading:      | Epidemiology, Occupational and environmental medicine, Health services research                                                         |
| Keywords:                       | Sleep medicine < ANAESTHETICS, COVID-19, Epidemiology < INFECTIOUS DISEASES, OCCUPATIONAL & INDUSTRIAL MEDICINE                         |
|                                 |                                                                                                                                         |

SCHOLARONE™  
Manuscripts

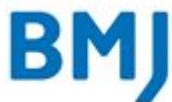

I, the Submitting Author has the right to grant and does grant on behalf of all authors of the Work (as defined in the below author licence), an exclusive licence and/or a non-exclusive licence for contributions from authors who are: i) UK Crown employees; ii) where BMJ has agreed a CC-BY licence shall apply, and/or iii) in accordance with the terms applicable for US Federal Government officers or employees acting as part of their official duties; on a worldwide, perpetual, irrevocable, royalty-free basis to BMJ Publishing Group Ltd ("BMJ") its licensees and where the relevant Journal is co-owned by BMJ to the co-owners of the Journal, to publish the Work in this journal and any other BMJ products and to exploit all rights, as set out in our [licence](#).

The Submitting Author accepts and understands that any supply made under these terms is made by BMJ to the Submitting Author unless you are acting as an employee on behalf of your employer or a postgraduate student of an affiliated institution which is paying any applicable article publishing charge ("APC") for Open Access articles. Where the Submitting Author wishes to make the Work available on an Open Access basis (and intends to pay the relevant APC), the terms of reuse of such Open Access shall be governed by a Creative Commons licence – details of these licences and which [Creative Commons](#) licence will apply to this Work are set out in our licence referred to above.

Other than as permitted in any relevant BMJ Author's Self Archiving Policies, I confirm this Work has not been accepted for publication elsewhere, is not being considered for publication elsewhere and does not duplicate material already published. I confirm all authors consent to publication of this Work and authorise the granting of this licence.



1  
2  
3 1 **Risk Factors for the Prevalence of Poor Sleep Quality in Lecturers During COVID-19**  
4  
5 2 **Pandemic in Ethiopia: an institution-based cross-sectional study**  
6

7 3 Amensisa Hailu Tesfaye<sup>1\*</sup>  
8

9  
10 4 <sup>1</sup>Department of Environmental and Occupational Health and Safety, Institute of Public Health,  
11 5 College of Medicine and Health Sciences, University of Gondar, Ethiopia  
12

13  
14 6 **E-mail addresses:**  
15

16 7 **Email address of authors:** Amensisa Hailu Tesfaye: [amensisahailu@gmail.com](mailto:amensisahailu@gmail.com)  
17

18  
19 8 **\*Corresponding author:** Amensisa Hailu Tesfaye, Department of Environmental and  
20  
21 9 Occupational Health and safety, Institute of Public Health, College of Medicine and Health  
22  
23 10 Sciences, University of Gondar, Gondar, Ethiopia, Email: [amensisahailu@gmail.com](mailto:amensisahailu@gmail.com)  
24  
25  
26  
27  
28  
29  
30  
31  
32  
33  
34  
35  
36  
37  
38  
39  
40  
41  
42  
43  
44  
45  
46  
47  
48  
49  
50  
51  
52  
53  
54  
55  
56  
57  
58  
59  
60

1  
2  
3 **24 Abstract**  
4

5 **25 Objective:** This study was conducted to assess the prevalence and risk factors of poor sleep quality  
6 among the University of Gondar academic staff, Ethiopia.  
7

8  
9 **27 Design:** An institution-based cross-sectional study was conducted from March to April 2021. A  
10 validated self-administered, standardized Pittsburgh Sleep Quality Index was used to quantify the  
11 amount of self-reported poor sleep quality. The collected data were entered into EpiData version  
12 4.6 and analyzed using STATA version 14 software. Binary logistic regressions were computed to  
13 determine the association between variables. The association was determined using an adjusted  
14 Odds ratio (AOR) with a 95% confidence interval (CI) at a p-value of < 0.05.  
15  
16

17  
18 **23 Setting:** The study was conducted at the University of Gondar, Northwestern Ethiopia.  
19

20  
21 **24 Participants:** Six hundred and seven lecturers participated in this study.  
22

23  
24 **25 Outcome measures:** The primary outcome is the prevalence of poor sleep quality, which was  
25 measured using the Pittsburgh Sleep Quality Index (PSQI).  
26

27  
28 **27 Results:** Overall response rate was 95.60% (N = 607). The age of the participants ranges from 21  
29 to 70 with a mean of 32.39 (SD ±6.80) years. The magnitude of poor sleep quality during the  
30 COVID-19 pandemic in the last month was 60.30% [95% CI (56.28%-64.21%)]. Working > 10  
31 hours per day [AOR= 2.19, 95% CI (1.16, 4.27)], electronic device use before bedtime  
32 [AOR=1.53, 95% CI (1.04, 2.27)], high risk perception of COVID-19 infections [AOR =1.60, 95%  
33 CI (1.04, 2.46)], and perceived job stress [AOR = 2.15 (95% CI, (1.50, 3.08))] were risk factors for  
34 poor sleep quality.  
35

36  
37 **28 Conclusion:** The study revealed that the prevalence of poor sleep quality was high during the  
38 COVID-19 pandemic. The finding highlights the importance of optimizing the working hours per  
39 day, minimizing electronic device use before bedtime, promoting risk perception toward COVID-  
40 19 infection, and developing workplace coping strategies for stress, which play a substantial role  
41 in minimizing poor sleep quality.  
42

43  
44 **29 Keywords:** Sleep quality, Poor sleep, Academic staff, Lectures, COVID-19, Ethiopia  
45  
46  
47  
48  
49

50  
51  
52

53  
54  
55

## 52 **Strengths and limitations of this study**

- 53 • The study has focused on one of the most potential groups affected by poor sleeping quality,  
54 particularly during COVID-19.
- 55 • This study is the first in its kind in exploring the magnitude and factors influencing poor sleep  
56 quality among academic staff in Ethiopia.
- 57 • Using the Pittsburgh Sleep Quality Index (PSQI) is an effective instrument used to measure  
58 the quality and patterns of sleep in adults.
- 59 • The study has limitations due to the cross-sectional nature of the data; it does not show a  
60 temporal relationship between independent variables and the outcome variable.
- 61 • The report of poor sleep quality may be underestimated or overstated because it relies on lecturers'  
62 subjective reports rather than objective measurements like actigraphy and polysomnography.

## 63 **Background**

64 Scholars describe sleep quality (SQ) as "one's perception that they fall asleep easily, sleep for a  
65 sufficient amount of time so that they wake up feeling rested, and can get through their day without  
66 experiencing excessive daytime sleepiness". An individual's subjective perception of his or her  
67 sleep can be evaluated using both subjective and objective methods [1]. The subjective method,  
68 Pittsburgh Sleep Quality Index (PSQI) is a widely used questionnaire to measure sleep quality [2].  
69 General health and quality of life are directly correlated with sleep quality [3]. Sleep disorders  
70 involve problems with the quality, timing, duration, and amount of sleep [4]. Poor sleep quality is  
71 a global phenomenon, which leads to poor health, increased risk of mortality, hormonal and  
72 biochemical changes, higher health care costs, increased use of health resources, absenteeism, and  
73 increased risk of psychological morbidity and burnout [5, 6]. Poor SQ has been a typical  
74 occurrence among the various working population during the COVID-19 pandemic and is regarded  
75 as a public health crisis that frequently goes undetected, underreported, and has very large  
76 economic impacts [7, 8]. Teaching has been identified as a profession associated with a high risk  
77 of poor sleep quality [9-11]; however, little research has been conducted to quantify the prevalence  
78 and risk factors of poor sleep quality among university academic staff worldwide [12, 13].

79 Academic staffs are at a higher risk of poor SQ, burnout, depression, stress, and anxiety as a result  
80 of the current COVID-19 pandemic, which has serious consequences on occupational health both

1  
2  
3 81 now and in the future [14]. Likewise, the World Health Organization (WHO) has classified poor  
4 82 sleep quality as a public health issue that exacerbates the risk of disease and death [15]. Poor SQ  
5 83 also has significant economic consequences. In the USA, for example, the annual costs of poor  
6 84 sleep have been estimated to be as high as US\$16 billion in healthcare costs and US\$50 billion in  
7 85 lost productivity [16]. In Australia, the costs were estimated to be approximately US\$1.8 billion  
8 86 for the health system and US\$66.3 billion for financial loss and decreased well-being [17-19].

9  
10 87 During the COVID-19 period, the prevalence of sleep quality was found to be at a poor level [20].  
11 88 A couple of studies from Brazilian [12, 21], documented that 61.3% and 44.2% of university  
12 89 academic staff reported poor sleep quality. Scientific investigation showed that four out of ten  
13 90 people do not get enough sleep, and one in five sleep poorly most nights, making poor sleep the  
14 91 second most common health complaint after pain [22, 23]. According to a study done in Iran [24],  
15 92 79.6% (n=133) of university staff reported having poor sleep quality. A similar finding was also  
16 93 found in a study conducted in Thailand [25], where 78.3% of respondents experienced poor sleep  
17 94 quality. So far, epidemiological data from Turkey indicated that 55.1% of adults had poor sleep  
18 95 quality [20]. In Ethiopia, the pooled prevalence of poor sleep quality was 53% among general  
19 96 populations and university students, with incidences ranging from 26% to 66.2% [26]. However,  
20 97 studies on sleep quality, particularly among university academic staff, are lacking.

21 98 Recent research shows that during the COVID-19 pandemic, sleep quality was impaired and the  
22 99 prevalence of poor sleep increased in both the working and general population [27-29].  
23 100 Furthermore, the global COVID-19 pandemic has compelled higher education institutions,  
24 101 including Ethiopian universities, the shift from face-to-face to online instruction, which has an  
25 102 impact on sleep quality [30-32]. Prolonged use of uses of computers, coupled with the brightness  
26 103 of the light that they project onto the retina, are factors that are thought to trigger changes in sleep  
27 104 patterns [33]. The light emitted from computers is in close proximity to the retina [34]. This emitted  
28 105 optical radiation at short wavelengths is close to the peak sensitivity of melatonin suppression [33].  
29 106 Since, the utilization of computers is fast during the COVID-19 pandemic among academic staff  
30 107 can be a source of computer light exposure, which can lead to poor sleep quality [35]. Moreover,  
31 108 poor sleep quality has been correlated to old age, low economic status, substance use, obesity, use  
32 109 of an electronic device before bedtime, higher risks of contracting COVID-19 at work, workload  
33 110 and job stress [36-44].

1  
2  
3 111 Given the widespread and harmful consequences of poor sleep quality, it needs to be a top priority  
4  
5 112 for public and occupational health. As previously stated, a thorough review of the literature  
6  
7 113 revealed that even less is known about the prevalence and factors of poor sleep quality among  
8  
9 114 academic staff and other university personnel in developing countries including Ethiopia [45].The  
10  
11 115 number of universities in Ethiopia is increasing, which is accompanied by an increase in academic  
12  
13 116 staff workforces. However, the lack of reliable and up-to-date data on mental health, especially on  
14  
15 117 sleep quality, makes it difficult for officials to plan for prevention and control measures. Therefore,  
16  
17 118 in the current study, we aimed to assess the prevalence and associated factors of poor sleep quality  
18  
19 119 among academic staff at the University of Gondar, Northwest Ethiopia.

## 19 120 **Methods and materials**

### 21 121 **Study design, Period, and Setting**

23 122 An institution-based cross-sectional study was conducted between March 17 to April 17, 2021.  
24  
25 123 The research was carried out at the University of Gondar, which is situated in the oldest and most  
26  
27 124 ancient city of Gondar , Northwestern Ethiopia, which is 737 kilometers far from Addis Ababa,  
28  
29 125 the capital city of Ethiopia [46]. The College of Medicine and Health Sciences, Comprehensive  
30  
31 126 Specialized Referral Hospital (CMHS), Maraki, Atse Tewdros, Atse Fasil, and Teda are the  
32  
33 127 university's five campuses [47]. On all campuses, there were 2,858 academic staff members  
34  
35 128 throughout the research period.

### 36 129 **Study participants**

38 130 The source population was the whole faculty members of the University of Gondar. The study  
39  
40 131 population, however, consisted of a random sample of academic personnel from each campus.  
41  
42 132 Academic personnel on critical illness, maternity leave, or sabbatical leave and individuals  
43  
44 133 diagnosed with sleep-related disorders were excluded, while academic staff with at least one year  
45  
46 134 of teaching experience and who were available throughout data collection were included.

### 47 135 **Sample size determination and sampling procedure**

49 136 The sample size was calculated by using a single population proportion formula [48] by  
50  
51 137 considering the following statistical assumptions:

53 138 Confidence level (CI) of 95%

54 139 Proportion = 50% (no previous study in the study area)

1  
2  
3 140 Margin of error of 5%

4  
5 141 Using the following single proportion formula:

6  
7  
8 142  $n = (Z\alpha/2)^2 \frac{[p(1-p)]}{d^2}$  where:

9  
10 143  $n$  = initial sample size,

11  
12 144  $Z = 1.96$ , the corresponding  $Z$ -score for the 95% CI

13  
14 145  $P$  = Proportion = 50%

15  
16 146  $d$  = Margin of error = 5% = 0.05

17  
18  
19 147  $n = (1.96)^2 \frac{[0.5(1-0.5)]}{0.05^2} = 384$

20  
21  
22 148 The final sample size was 635 people, after taking into account a 10% non-response rate and a  
23 149 design effect of 1.5 because, in the absence of prior literature, a design effect of 1.5 to 2.0 is  
24 150 endorsed [49]. We employed a stratified sampling technique to select participants from the five  
25 151 campuses of the University of Gondar. A proportional allocation for each stratum defined how  
26 152 many sample points were needed. Thus, there were a total of 1027 academic staff members in the  
27 153 College of Medicine and Health Sciences ( $N_1=1027$ ), 630 academic staff members on Maraki  
28 154 campus ( $N_2=630$ ), 509 academic staff members on Tewdros campus ( $N_3=509$ ), 536 academic  
29 155 staff members on the Fasil campus ( $N_4=536$ ), and 156 academic staff members on the Teda  
30 156 campus ( $N_5=156$ ). Consequently, the numbers of participants from each campus were 228, 140,  
31 157 119, 113, and 35 from the College of Medicine and Health Sciences, Maraki, Fasil, Tewodros, and  
32 158 Teda campuses, respectively. The requisite sample sizes were then determined using a simple  
33 159 random sampling technique, and academic staff members from each stratum were randomly  
34 160 assigned using the OpenEpi random software version 3.

### 35 161 **Variable measurement and definition of terms**

36 162 **Poor sleep quality:** This was measured using the Pittsburgh Sleep Quality Index (PSQI) 19-item  
37 163 self-report measure of sleep quality over the past month was used to measure academicians poor  
38 164 sleep quality during the COVID-19 pandemic period (**supplementary file**). The tool, which was  
39 165 free to use and designed to measure the outcome variable, has a diagnostic sensitivity of 89.6%  
40 166 and a specificity of 86.5% at greater than five cutoff values for identifying cases with sleep

1  
2  
3 167 disorders [50]. PSQI consists of 7 component scores (ranging from 0 to 3), measuring subjective  
4 168 sleep quality, sleep latency, sleep duration, sleep efficiency, sleep disturbances, use of sleeping  
5 169 medication, and daytime dysfunction. The 7 component scores are summed to give a global PSQI  
6 170 score ranging from 0 to 21, with higher scores reflecting greater overall sleep disturbances. A  
7 171 global PSQI score of greater than 5 indicates poor sleep quality [33, 51].

12 172 **Body mass index (BMI):** weight in kilograms divided by the square of the height in meters ( $\text{kg}/\text{m}^2$ )  
13 173 categorized as underweight =  $\text{BMI} < 18.5$ , normal (health) =  $\text{BMI} 18.5\text{--}24.9$ , overweight =  $\text{BMI}$   
14 174  $25.0\text{--}29.9$ , and obese =  $\text{BMI} \geq 30.0$  [52].

18 175 **Alcohol drinker:** a scholar who drinks alcohol of any kind at least twice each week [53]

20 176 **Cigarette smoker:** a scholar with a daily consumption of at least one stick of cigarettes [54].

22 177 **Khat chewer:** a scholar who had chewed khat in the previous month [42].

24 178 **Doing physical exercise:** doing any type of physical activity at least twice a week for at least 30  
25 179 minutes [55].

28 180 **Electronic device use:** if the participant utilizes/ watches at least one of the following: television,  
29 181 computer, tablet, or mobile phone in bed before going to sleep [56].

32 182 **Chronic illness:** illnesses such as asthma, diabetes mellitus, stroke, kidney stone, hypertension  
33 183 that can be managed, but cannot be cured and have a greater risk of developing a poor quality of  
34 184 sleep, [57].

38 185 **Risk perception of COVID-19 infection:** was assessed by two psychological dimensions;  
39 186 perceived susceptibility and perceived severity. The first dimension was proxied by how likely  
40 187 one considered oneself (his/her family) would be infected with COVID-19 if no preventive  
41 188 measures will be taken. The second dimension was proxied by how one rated the seriousness of  
42 189 symptoms caused by COVID-19, their perceived chance of having COVID-19 cured and that of  
43 190 survival if infected with COVID-19. By combining the two dimensions, five items with five  
44 191 response options were asked to determine the respondents' levels of risk perception, with a higher  
45 192 total score indicating a high perceived risk of COVID-19 infection [58].

52 193 **Job satisfaction:** the total score of at least 32 on the general job satisfaction scale [59].

54 194 **Perceived job stress:** a score of at least 21 on the workplace-stress scale [60].

195

## 196 **Data Collection Tools and Procedures**

197 Data were collected through a validated self-administered standardized structured questionnaire.  
198 The questionnaire was adapted after an extensive review of related literature and similar study  
199 tools [12, 42, 57, 61-63]. The questionnaire embraces three sections containing different items.  
200 The first section, socio-demographic characteristics, assesses information on age, sex, religion,  
201 educational status, working experience, and monthly salary. The second element of the  
202 questionnaire hugs information on poor sleep quality, which was assessed by using the PSQI,  
203 which is a measure of sleep disturbance for the period of 1-month immediately preceding the time  
204 of administration. PSQI is an effective and the most widely used instrument in diagnosis of sleep  
205 disorders in different populations [9, 64]. The tool is easy to understand, patient compliant and  
206 requires about 5 min to be completed. 10]. The PSQI contains 19 items and 7 clinically important  
207 components in relation to sleep difficulties: subjective sleep quality, sleep latency, sleep duration,  
208 sleep efficiency, sleep disturbance, use of sleep medication, and daytime dysfunction. The total  
209 PSQI score was calculated by summing up the seven component scores as cited in [50]. Scoring  
210 of the answers is based on a 0 to 3 scale, whereby 3 reflects the negative extreme on the Likert  
211 scale, as well a global score of between 0 and 21. Individuals scoring a global score of greater than  
212 5 were deemed poor sleep quality [65]. The PSQI has been validated in many languages with  
213 acceptable psychometric properties [66] and is frequently used in clinical and research settings  
214 [67]. The PSQ has also been validated as reliable for use in Ethiopian community [51]. The PSQI's  
215 validity was supported by a comprehensive test used to diagnose sleep disorders like  
216 polysomnographic findings [68, 69]. The PSQI has a sensitivity of 89.6% and specificity of 86.5%  
217 for identifying cases with sleep disorder, using a cut-off score of 5 [50]. The last part of the  
218 questionnaire includes information used to assess behavioral factors and psychosocial factors like  
219 cigarette smoking (yes/no), BMI (kg/m<sup>2</sup>), physical activity (yes/no), alcohol consumption  
220 (yes/no), use of an electronic device before bedtime (yes/no), history of chronic illness (yes/no),  
221 risk perception of COVID-19, job satisfaction, job stress, and workload.

222 Risk perception regarding COVID-19 in this study was measured by using two psychological  
223 dimensions; perceived susceptibility and perceived severity. The first dimension (perceived  
224 susceptibility) contains two questions; including how likely they will be infected with COVID-19



1  
2  
3 225 and how likely one considered oneself (his/her family) would be infected with COVID-19 if no  
4  
5 226 preventive measures will be taken. Responses of the two questions were rated on a 5-point Likert  
6  
7 227 scale (ranging from 1 = very likely to 5 = very unlikely). The second dimension (perceived  
8  
9 228 severity) contains three questions; including how one rated the seriousness of symptoms caused  
10  
11 229 by COVID-19, their perceived chance of having COVID-19 cured, and that of survival if infected  
12  
13 230 with COVID-19. Responses of the three questions were rated on a 5-point Likert scale (ranging  
14  
15 231 from 1 = Very serious /Very low to 5 = Not serious at all/Very high). By combining the two  
16  
17 232 dimensions, making five questions each answered on a Likert scale of 1 to 5 giving rise to a total  
18  
19 233 score ranging from 5 to 25. The higher the score, the higher the risk perception of COVID-19  
20  
21 234 infection [70]. We used the 10-item generic job satisfaction scale questionnaire to measure  
22  
23 235 academicians' perceived job satisfaction [59]. The scale comprised ten questions ranging from 1  
24  
25 236 to 5 each item and ranged from very dissatisfied, dissatisfied, neutral, satisfied and very satisfied,  
26  
27 237 according to their occurrence respectively, in 1 month before the survey. The scale had 10 items  
28  
29 238 with a rating of 1 to 5, and the responses ranged from very dissatisfied, dissatisfied, neutral,  
30  
31 239 satisfied and very satisfied, depending on how frequently they occurred in the month before to the  
32  
33 240 survey and then summing up all 10 items. The scale produced a single ranking, with high scores  
34  
35 241 indicated higher job satisfaction vice versa. Perceived job-related stress of the participants was  
36  
37 242 collected using the 8-item workplace stress scale questionnaire [60]. The scale comprised eight  
38  
39 243 questions ranging from 1 to 5 each item and ranged from never, rarely, sometimes, often and very  
40  
41 244 often, according to their occurrence respectively, in 1 month before the survey. The 8- item  
42  
43 245 workplace stress scores are obtained by reversing scores on three positive items, e.g. 5 = 1, 4 = 2,  
44  
45 246 3 = 3, etc., and then summing up all 8 items. Items 6, 7 and 8 are positive items. The scale produced  
46  
47 247 a single ranking, with high scores indicated higher stress levels and vice versa. The instruments  
48  
49 248 used in the current study have been employed in previous studies conducted in the country's  
50  
51 249 context [71-74].

### 52 250 **Data quality control**

53 251 To maintain uniformity, the questionnaire was initially created in English, translated into the local  
54  
55 252 tongue of Amharic, and then translated back to English. Following appropriate training and  
56  
57 253 orientation, three BSc nurses and MPH Environmental health specialist who were employed at the  
58  
59 254 comprehensive specialized hospital of the University of Gondar participated in data collection.  
60  
255 The data collectors and supervisor took the orientation on issues relating to the clarity of the

1  
2  
3 256 questions, objectives of the study, confidentiality of information, the voluntary involvement  
4  
5 257 (consent) participants in the study, and on time of data collection as study participants' regular  
6  
7 258 duties should not be compromised. Both data collectors and supervisors were under the lead  
8  
9 259 investigator's supervision. The pre-test was carried out at Teda Health Sciences College in Gondar  
10  
11 260 city on 5% (31) of the sample size to ensure the validity and reliability of the questionnaire, yet  
12  
13 261 the College was not included in the final survey. Based on the results of the pretest analysis, various  
14  
15 262 modifications were made including the clarification of a few ambiguities and misinterpretations,  
16  
17 263 and an estimation of how long the data gathering process would take. Feedback was provided by  
18  
19 264 discussing any issue that arose during data collection with the primary investigator, the supervisor,  
20  
21 265 and the data collectors.

### 21 266 **Data processing and analysis**

22  
23 267 Data were entered into Epi-data version 4.6 after being verified as complete and exported to  
24  
25 268 STATA version 14 for additional analysis. We used descriptive statistics, narration, tabulation,  
26  
27 269 and graphics to present the findings. Prior to doing bivariable and multivariable binary logistic  
28  
29 270 regression analyses, the variables' normality, outliers, and multicollinearity were examined. A  
30  
31 271 variance inflation factor (VIF) was used to test the multicollinearity assumption, and all variables  
32  
33 272 displayed values of less than 5. As a result, multicollinearity was not observed to exist. Also, the  
34  
35 273 reliability of the questionnaire was tested using Cronbach's Alpha and found a reliable Cronbach's  
36  
37 274 Alpha = 0.79, and therefore the questionnaire was tolerable for its consistency in repeating what  
38  
39 275 had previously been measured using the tool [51]. Additionally, Cronbach's Alpha was used to  
40  
41 276 examine the questionnaire's reliability, and the reliability Cronbach's Alpha value was 0.79. As a  
42  
43 277 result, the questionnaire was deemed satisfactory for its consistency in reproducing what had  
44  
45 278 previously been measured using the instrument. A binary logistic regression was used to compute  
46  
47 279 the relationship between the variables. To control the effects of potential confounders, variables  
48  
49 280 with p-values of 0.2 in the bivariable logistic regression analysis were exported to a multivariable  
50  
51 281 logistic regression. Last but not least, in the multivariable binary logistic regression model,  
52  
53 282 statistically significant variables were established at a p-value of 0.05, and an adjusted odds ratio  
54  
55 283 (AOR) with a confidence interval of 95% was provided to quantify the strength of the association.  
56  
57 284 The Hosmer-Lemeshow test was used to determine the final model's goodness of fit, and the results  
58  
59 285 revealed a good fit ( $p=0.65$ ) [75].

## 286 Patient and public involvement statement

287 University lecturers were participated in this investigation by contributing useful information.  
288 However, they have never been involved in the study design, protocol, data collection tools, and  
289 reporting and disseminating the findings.

## 290 Results

### 291 Socio-demographic characteristics of study participants

292 A total of 635 questionnaires were distributed, giving a response rate of 95.59% (N = 607). The  
293 age of the participants ranged from 21 to 70, with a mean ( $\pm$ SD) of 32.39 ( $\pm$ 6.80) years old.  
294 Moreover, more than two-thirds of the participants were male (71.83%), and the majority of them,  
295 362 (59.64%), indicated that they were married. Regarding educational status, 416(68.53%) of the  
296 participants had master's degree. The participants' median estimated (interquartile range (IQR)  
297 monthly income was 11305 (10700-13600) Ethiopian Birr (ETB) (**Table 1**).

298 **Table 1:** Socio-demographic characteristics of academic staff in University of Gondar, Ethiopia,  
299 2021 (N=607).

| Variables                 | Frequency (n) | Percent (%) |
|---------------------------|---------------|-------------|
| <b>Sex</b>                |               |             |
| Male                      | 436           | 71.83       |
| Female                    | 171           | 28.17       |
| <b>Age (years)</b>        |               |             |
| 21-29                     | 226           | 37.23       |
| 30-39                     | 301           | 49.59       |
| $\geq$ 40                 | 80            | 13.18       |
| <b>Religion</b>           |               |             |
| Orthodox                  | 486           | 80.07       |
| Muslim                    | 69            | 11.37       |
| Protestant                | 52            | 8.57        |
| <b>Marital status</b>     |               |             |
| Single                    | 245           | 40.36       |
| Married                   | 362           | 59.64       |
| <b>Educational status</b> |               |             |

|                                 |     |       |
|---------------------------------|-----|-------|
| Bachelor                        | 94  | 15.49 |
| Master                          | 416 | 68.53 |
| Ph.D.                           | 97  | 15.98 |
| <b>Work experience in years</b> |     |       |
| ≤5                              | 167 | 27.51 |
| 6-10                            | 249 | 41.02 |
| >10                             | 191 | 31.47 |
| <b>Monthly salary (ETB)</b>     |     |       |
| <10 000                         | 99  | 16.31 |
| 10 000-13 000                   | 331 | 54.53 |
| >13 000                         | 177 | 29.16 |

300 **Key:** ETB= Ethiopian Birr (currency)

### 301 Behavioral and psychosocial characteristics of study participants

302 Four hundred fourteen (68.20%) of the participants were working between 6 and 10 hours per day,  
 303 and 79 (13.11%) participants were working more than 10 hours per day. Of the study participants,  
 304 the number of respondents who admitted to smoking cigarettes was 108 (17.79%). While 112  
 305 (18.45) said they had alcohol drinking habits, over one-third (33.28%) of respondents were  
 306 performing physical exercise at least twice a week. The majority of the respondents, 434 (71.5%),  
 307 had a normal (18.5-24.9 kg/m<sup>2</sup>) BMI, while 48 (7.91%) of them were underweight (>18.5 kg/m<sup>2</sup>)  
 308 BMI. Out of the study participants, 188 (30.97%) of them clarified that they had a chronic illness,  
 309 and almost half (51.24%) of the study participants have used an electronic device before bedtime.  
 310 Regarding psychosocial characteristics, nearly one-fourth (24.38%) of the respondents had high-  
 311 risk perceptions of the COVID-19 virus. Moreover, 516 (85.01%) respondents supposed they were  
 312 satisfied with their jobs. Furthermore, when asked whether they felt stressed out by their work,  
 313 276 respondents (45.47 %) said they did (**Table 2**).

314 **Table 2:** Behavioral and psychosocial characteristics of academic staff in the University of  
 315 Gondar, Ethiopia, 2021 (N=607).

| Variables                    | Frequency (n) | Percent (%) |
|------------------------------|---------------|-------------|
| <b>Working hours per day</b> |               |             |
| ≤5hr                         | 114           | 18.78       |

|    |                                               |     |       |
|----|-----------------------------------------------|-----|-------|
| 1  |                                               |     |       |
| 2  |                                               |     |       |
| 3  | 6-10hr                                        | 414 | 68.20 |
| 4  | >10hr                                         | 79  | 13.01 |
| 5  |                                               |     |       |
| 6  | <b>Cigarette smoker</b>                       |     |       |
| 7  |                                               |     |       |
| 8  | Yes                                           | 108 | 17.79 |
| 9  | No                                            | 499 | 82.21 |
| 10 |                                               |     |       |
| 11 | <b>Alcohol consumption habit</b>              |     |       |
| 12 |                                               |     |       |
| 13 | Yes                                           | 112 | 18.45 |
| 14 | No                                            | 495 | 81.55 |
| 15 |                                               |     |       |
| 16 | <b>Khat chewing behavior</b>                  |     |       |
| 17 |                                               |     |       |
| 18 | Yes                                           | 19  | 3.13  |
| 19 | No                                            | 588 | 96.87 |
| 20 |                                               |     |       |
| 21 | <b>Physical exercise</b>                      |     |       |
| 22 |                                               |     |       |
| 23 | Yes                                           | 202 | 33.28 |
| 24 | No                                            | 405 | 66.72 |
| 25 |                                               |     |       |
| 26 | <b>Body mass index (BMI)</b>                  |     |       |
| 27 |                                               |     |       |
| 28 | Underweight                                   | 48  | 7.91  |
| 29 | Normal                                        | 434 | 71.50 |
| 30 | Overweight and obese                          | 125 | 20.59 |
| 31 |                                               |     |       |
| 32 | <b>Chronic Illness</b>                        |     |       |
| 33 |                                               |     |       |
| 34 | Yes                                           | 188 | 30.97 |
| 35 | No                                            | 419 | 69.03 |
| 36 |                                               |     |       |
| 37 | <b>The habit of taking breaks</b>             |     |       |
| 38 |                                               |     |       |
| 39 | Yes                                           | 329 | 54.20 |
| 40 | No                                            | 278 | 45.80 |
| 41 |                                               |     |       |
| 42 | <b>Electronic device use</b>                  |     |       |
| 43 |                                               |     |       |
| 44 | Yes                                           | 311 | 51.24 |
| 45 | No                                            | 296 | 48.76 |
| 46 |                                               |     |       |
| 47 | <b>Duration of electronic device use</b>      |     |       |
| 48 |                                               |     |       |
| 49 | ≤3hrs/day                                     | 127 | 40.84 |
| 50 | >hrs/day                                      | 184 | 59.16 |
| 51 |                                               |     |       |
| 52 | <b>Risk perception towards COVID-19 virus</b> |     |       |
| 53 |                                               |     |       |
| 54 | High                                          | 148 | 24.38 |
| 55 | Low                                           | 459 | 75.62 |
| 56 |                                               |     |       |
| 57 | <b>Colleagues relationship</b>                |     |       |
| 58 |                                               |     |       |
| 59 |                                               |     |       |
| 60 |                                               |     |       |

|                             |     |       |
|-----------------------------|-----|-------|
| Good                        | 539 | 88.80 |
| Poor                        | 68  | 11.20 |
| <b>Job satisfaction</b>     |     |       |
| Satisfied                   | 516 | 85.01 |
| Not satisfied               | 91  | 14.99 |
| <b>Perceived job stress</b> |     |       |
| Stressed                    | 276 | 45.47 |
| Not stressed                | 331 | 54.53 |
| <b>Workload</b>             |     |       |
| Yes                         | 506 | 83.36 |
| No                          | 101 | 16.64 |

316

### 317 Prevalence of poor sleep quality and its components scores

318 The mean global score of PSQI (computed using the component scores) was 6.80, 95% CI (6.55,  
 319 7.04). The result of this study revealed that 60.30% (95% CI, 56.28%-64.21%) of academicians  
 320 were classified as having poor sleep quality. Seven components of sleep quality in the present  
 321 study were assessed and the components identified their sleep status (**supplementary file**).  
 322 Accordingly, 514 (84.68%) of the academicians had fairly good to very good sleep perception.  
 323 From the total study participants, 342 (56.34%) had mild difficulty in falling asleep (PSQI latency).  
 324 Regarding sleeping duration, only 165 (27.18%) of the respondents had more than 7 hours of sleep  
 325 per night, and 326 (53.71%) had a very high habitual sleep efficiency (>85%). Moreover, most  
 326 (66.39%) of academicians reported that they had mild difficulty in the PSQI disturbance domain  
 327 and only 39 (6.42%) of them used sleep medication to sleep during the past month. Furthermore,  
 328 196 (32.29%) of them had mild to severe difficulty in PSQI day dysfunction due to sleepiness in  
 329 the past month (**Table 3**).

330 **Table 3:** Poor sleep quality and its components scores of academic staff in the University of  
 331 Gondar, Ethiopia, 2021 (N=607).

| Variables               | Frequency (n) | Percent (%) |
|-------------------------|---------------|-------------|
| <b>Sleep perception</b> |               |             |
| Very good               | 265           | 43.66       |
| Fairly good             | 249           | 41.02       |

|                                          |     |       |
|------------------------------------------|-----|-------|
| Fairly bad                               | 80  | 13.18 |
| Very bad                                 | 13  | 2.14  |
| <b>Sleep latency (falling asleep)</b>    |     |       |
| 0 to 15minutes (0)                       | 27  | 4.45  |
| 16 to 30 minutes (1)                     | 342 | 56.34 |
| 31 to 60 minutes (2)                     | 161 | 26.52 |
| >60 minutes (3)                          | 77  | 12.69 |
| <b>Sleep duration</b>                    |     |       |
| >7hrs (0)                                | 165 | 27.18 |
| 6h to 7hrs (1)                           | 148 | 24.38 |
| < 6hrs (2 & 3)                           | 294 | 48.43 |
| <b>Sleep efficiency</b>                  |     |       |
| >85% (0)                                 | 326 | 53.71 |
| 75% to 84% (1)                           | 143 | 23.56 |
| 65% to 74% (2)                           | 60  | 9.88  |
| <65% (3)                                 | 78  | 12.85 |
| <b>Sleep disturbance</b>                 |     |       |
| Never (0)                                | 116 | 19.11 |
| 1 time a week (1)                        | 403 | 66.39 |
| 1–2 times a week (2)                     | 84  | 13.84 |
| ≥3 times a week (3)                      | 4   | 0.66  |
| <b>Used sleep medication</b>             |     |       |
| Never (0)                                | 568 | 93.57 |
| 1 time a week (1)                        | 27  | 4.45  |
| 1–2 times a week (2)                     | 7   | 1.15  |
| ≥3 times a week (3)                      | 5   | 0.82  |
| <b>Daytime dysfunction</b>               |     |       |
| No problem (0)                           | 411 | 67.71 |
| 1 time a week (1)                        | 143 | 23.56 |
| 1–2 times a week (2)                     | 44  | 7.25  |
| ≥3 times a week (3)                      | 9   | 1.48  |
| <b>Total score of poor sleep quality</b> |     |       |
| ≤ 5 (Good sleep quality)                 | 241 | 39.70 |
| > 5 (Poor sleep quality)                 | 366 | 60.30 |

332 **Key:** 0= No difficulty, 1=Mild difficulty, 2=Moderate difficulty, 3=Sever difficulty

333 **Factors associated with poor sleep quality**

334 In the bivariable binary logistic regression analysis, sex (p-value of 0.124), educational status (p-  
 335 value of 0.179), working hours per day (p-value of 0.003), khat chewing (p-value of 0.042), not  
 336 perform physical activities (p-value of 0.122), electronic devise use (p-value of 0.004), chronic  
 337 illness (p-value of 0.002), risk perception towards COVID-19 virus (p-value of 0.005), job  
 338 dissatisfaction (p-value of 0.112), and perceived job stress (p-value of  $\leq 0.001$ ) were the factors  
 339 associated with poor sleep quality. However, after controlling for confounding variables in the  
 340 multivariable binary logistic regression analysis, only working hours per day, electronic device  
 341 use before bedtime, risk perception towards COVID-19 infection, and perceived job stress  
 342 remained to have a significant association with poor sleep quality.

343 The probability of developing poor sleep quality was 2.19 times greater in employees who worked  
 344 more than 10 hours per day compared to those who worked for 5 hours or less per day [AOR=  
 345 2.19, 95% CI (1.16, 4.27)] at a p-value of 0.019. Similarly, participants who use electronic devices  
 346 before bedtime were 1.53 times more likely to experience poor sleep quality compared to who  
 347 didn't use electronic devices before bedtime counterparts [AOR=1.53, 95% CI (1.04, 2.27)] at a  
 348 p-value of 0.031. Moreover, the odds of having poor sleep quality were 1.60 times more likely  
 349 among workers who had a high-risk perception of COVID-19 infection than among those who had  
 350 a low-risk perception about it [AOR =1.60, 95% CI (1.04, 2.46)] at a p-value of 0.032. Finally, the  
 351 chances of suffering from poor sleep quality among academicians who had perceived job stress  
 352 were 2.15 times higher as compared to those who had no job stress [AOR = 2.15 (95% CI, (1.50,  
 353 3.08)] at a p-value of  $\leq 0.01$  as shown in **Table 4**.

354 **Table 4:** Bivariable and multivariable logistic regression analysis of factors associated with poor  
 355 sleep quality among academic staff, University of Gondar, Ethiopia, 2021 (N=607).

| Variables                 | Poor sleep quality |     | COR with 95% CI  | AOR with 95% CI | P-value |
|---------------------------|--------------------|-----|------------------|-----------------|---------|
|                           | Yes                | No  |                  |                 |         |
| <b>Sex</b>                |                    |     |                  |                 |         |
| Male                      | 256                | 180 | 1                | 1               |         |
| Female                    | 110                | 61  | 1.27 (0.88-1.83) | 1.42 (.94-2.13) | 0.091   |
| <b>Educational status</b> |                    |     |                  |                 |         |



|                                          |     |     |                   |                          |              |
|------------------------------------------|-----|-----|-------------------|--------------------------|--------------|
| Bachelor                                 | 62  | 32  | 1                 | 1                        |              |
| Master                                   | 243 | 173 | 0.72 (0.45-1.16)  | 0.74 (0.44-1.23)         | 0.245        |
| Ph.D.                                    | 61  | 36  | 0.87 (0.48-1.58)  | 0.87 (0.46-1.65)         | 0.674        |
| <b>Working hours per day</b>             |     |     |                   |                          |              |
| ≤5hr                                     | 59  | 55  | 1                 | 1                        |              |
| 6-10hr                                   | 249 | 165 | 1.41 (0.93-2.13)  | 1.10 (0.76-1.85)         | 0.679        |
| >10hr                                    | 58  | 21  | 2.57 (1.39-4.78)  | <b>2.19 (1.16-4.27)*</b> | <b>0.019</b> |
| <b>Khat chewing</b>                      |     |     |                   |                          |              |
| Yes                                      | 16  | 3   | 3.63 (1.05-12.58) | 3.00 (0.82-11.00)        | 0.097        |
| No                                       | 350 | 238 | 1                 | 1                        |              |
| <b>Physical exercise</b>                 |     |     |                   |                          |              |
| Yes                                      | 113 | 89  | 1                 | 1                        |              |
| No                                       | 253 | 152 | 1.31 (0.93-1.85)  | 1.40 (0.97-2.03)         | 0.068        |
| <b>Electronic device use</b>             |     |     |                   |                          |              |
| Yes                                      | 205 | 106 | 1.62 (1.17-2.25)  | <b>1.53 (1.04-2.27)*</b> | <b>0.031</b> |
| No                                       | 161 | 135 | 1                 | 1                        |              |
| <b>Chronic Illness</b>                   |     |     |                   |                          |              |
| Yes                                      | 131 | 57  | 1.80 (1.25-2.59)  | 1.45 (0.98-1.99)         | 0.059        |
| No                                       | 235 | 184 | 1                 | 1                        |              |
| <b>Risk perception of COVID-19 virus</b> |     |     |                   |                          |              |
| High                                     | 104 | 44  | 1.77 (1.19-2.65)  | <b>1.60 (1.04-2.46)*</b> | <b>0.032</b> |
| Low                                      | 262 | 197 | 1                 | 1                        |              |
| <b>Job satisfaction</b>                  |     |     |                   |                          |              |
| Satisfied                                | 318 | 198 | 1                 | 1                        |              |
| Not satisfied                            | 48  | 43  | 0.70 (0.44-1.09)  | 0.67 (0.42-1.08)         | 0.099        |
| <b>Perceived job stress</b>              |     |     |                   |                          |              |
| Stressed                                 | 197 | 79  | 2.39 (1.70-3.35)  | <b>2.15(1.50-3.08)*</b>  | <b>≤0.01</b> |
| Not stressed                             | 169 | 162 | 1                 | 1                        |              |

356 **Keys:** 1=reference category, AOR=adjusted odds ratio, CI= confidence interval, COR=crudes  
 357 odds ratio, COVID-19= Corona virus disease 19, \*= significant at  $p < 0.05$  in multivariable logistic  
 358 regression analysis, Hosmer and Lemeshow test  $p = 0.650$ .

## 359 Discussion

1  
2  
3 360 Poor sleep quality incurs substantial health, economic and societal costs. Understanding the  
4  
5 361 magnitude and various factors linked to the ailment would help researchers identify viable  
6  
7 362 therapies to improve sleep quality in vulnerable populations. The higher education work  
8  
9 363 environment is characterized by a highly competitive work nature. The University teaching staff  
10  
11 364 in addition to their normal teaching activities, handled various tasks including conducting and  
12  
13 365 preparing research for publication, providing community services, and managing administrative  
14  
15 366 positions. Furthermore, their regular teaching activities have shifted from face-to-face to online  
16  
17 367 instruction during the COVID-19 pandemic, which has an impact on their sleep quality.  
18  
19 368 Understanding the magnitude and investigating etiologies of the condition plays a paramount role  
20  
21 369 to establish effective prevention and control strategies. To our knowledge, the current study is the  
22  
23 370 first to assess the prevalence and risk factors of poor sleep quality among university academic staff  
24  
25 371 in Ethiopia. The prevalence of poor sleep quality in the last one month was found to be 60.30%  
26  
27 372 with 95% CI (56.28-64.21). Working for more than 10 hours per day, electronic device use before  
28  
29 373 bedtime, high-risk perception of COVID-19 infection, and having job stress were factors positively  
30  
31 374 associated with poor sleep quality in the current study.

32  
33 375 Findings of two investigations from Brazil (57.9%) [76] and (61.3%) [12] supported the current  
34  
35 376 data. This agreement could be due to the nature of tasks in the academic environments including  
36  
37 377 roles related to teaching and research activities, which usually resemble in every higher academic  
38  
39 378 institution. Participants in those nations might also be obliged to work in a substandard workplace  
40  
41 379 in an unhealthy manner for prolonged periods, and fewer individuals are aware of sleep health and  
42  
43 380 the effect of poor sleep quality. The other possible explanation might be due to study participants  
44  
45 381 having a similar age group as compared to participants in those countries.

46  
47 382 On the contrary, the current study had a higher magnitude of the risk of poor sleep quality  
48  
49 383 compared to the studies conducted in Turkey (38.9%) [13] and Malaysia (45%) [77]. This  
50  
51 384 difference might be due to the unstable socioeconomic status of the respondents in this study. The  
52  
53 385 respondents in this study might attempt to compensate for their low salaries by teaching different  
54  
55 386 shifts at multiple colleges and schools. This may lead to longer working hours because they start  
56  
57 387 their daily work activities much earlier in the day and conclude their working day much later. The  
58  
59 388 difference might be also due to the sample size variation; the previous studies were conducted  
60  
389 among a small number of study participants compared to the number of participants in this study.

1  
2  
3 390 The other possible justifications for the difference might be the variation in the educational system,  
4 391 study setting, workload, and cultural differences between Ethiopia and those countries.

6  
7 392 There were no study reports with a larger magnitude than the current finding. A possible reason  
8  
9 393 for the increased magnitude of sleep problems in the current study could be due to the study period;  
10 394 we conducted the study during the early phase of the COVID-19 pandemic. Higher education  
11 395 institutions needed to look for alternate educational strategies to be adopted during the COVID-19  
12 396 pandemic and the e-learning strategy emerged as an alternative solution to continue education. The  
13 397 educational institutions started using different educational platforms like Google classroom,  
14 398 Zoom, and Microsoft teams. Lecturers were subjected to excessive use of digital devices without  
15 399 breaks as they were shifted to online teaching. There has also been an increased digitalization for  
16 400 recreational purposes. Hence, it was noted as exposure to light emitted from digital devices has  
17 401 been interfering with the circadian regulation/melatonin rhythm [33, 78], which may lead to poor  
18 402 sleep quality.

20  
21 403 In this study, long working hour per day (>10hrs/day) was significantly associated with poor sleep  
22 404 quality. The finding echoes the result of previous investigations [9, 79]. A possible justification  
23 405 for this report may be that employees with long working hours need more time to recover from  
24 406 work-induced fatigue [80]. However, long working hours reduce the amount of private time  
25 407 available to them, which may lead to sleep deprivation [81]. For recovery from fatigue, not only  
26 408 sleep but also relaxation, for example, spending time with family and friends, resting, or reading  
27 409 is needed, but long working hours may also reduce relaxation time [82]. Therefore, reduced private  
28 410 time for workers due to long working hours may lead to sleeplessness, and cause sleep disorders.  
29 411 In addition, due to the nature of their occupation, our study participants spend a lot of time working  
30 412 with computers and other electronic devices. Plausible investigations also confirmed that the  
31 413 utilization of electronic devices for a long period of time is associated with sleep disorders [33,  
32 414 34].

33  
34 415 Electronic device use before bedtime showed a significant association with poor sleep quality.  
35 416 Similar results were reported in other studies [83-85]. This could be reasoned as sleep quantity and  
36 417 quality are significantly reduced when people use digital devices for an extended period [86]. For  
37 418 example, cell phones, tablets, readers, computers, and laptops emit short-wavelength enriched  
38 419 light, which has been found to suppress or delay the normal generation of melatonin in the evening

1  
2  
3 420 and minimize feelings of sleepiness [87]. Moreover, workforces in a higher education context are  
4  
5 421 often confronted with demanding responsibilities requiring work overload, long working hours,  
6  
7 422 and stress, in addition to the COVID-19 pandemic difficulties in the world of education. Because  
8  
9 423 of the pandemic, universities were forced to conduct all of their activities online, including in the  
10  
11 424 current study setting, which increased the usage of electronic devices, contributing to or  
12  
13 425 exacerbating poor sleep quality [88].

14 426 Our current study revealed a high-risk perception of COVID-19 infections was found to be a  
15  
16 427 determinant factor of poor sleep quality. This finding is in concordance with other research reports  
17  
18 428 [44, 89]. This could be explained as those people who thought they were at a higher risk of  
19  
20 429 developing COVID-19 had more fear than those who thought they were at a lower risk. Fear and  
21  
22 430 rumination were also found to be adversely related to sleep quality, indicating that fear of infection  
23  
24 431 and rumination did lead to poor sleep quality during the pandemic, which contribute to poorer  
25  
26 432 sleep quality both directly and indirectly by increasing fear [44]. Several researchers had examined  
27  
28 433 the influence of the COVID-19 pandemic on mental health, concluding that persons who are  
29  
30 434 fearful of becoming infected are more likely to develop sleeping disturbances [90].

31 435 Participants who reported having job stress were 2.38 times more likely to have poor sleep quality  
32  
33 436 than those who did not have stress. The result is in agreement with results of the studies conducted  
34  
35 437 in Brazil [76], Malaysia [9, 91], and Indonesia [92]. The plausible reason might be due to the  
36  
37 438 linkages between sleep, stress regulation, and alteration in the hypothalamic-pituitary-adrenal axis  
38  
39 439 implication of psychopathology and sleep-wake cycle. Job stress can lead to the release of an  
40  
41 440 excessive level of glucocorticoids hormones like cortisol. A higher level of cortisol during stressful  
42  
43 441 life events primes to sleep rhythm disruption that results in sleep deprivation [93, 94].

## 442 **Conclusion**

443 This study revealed that two-thirds of the participants had poor sleep quality during the COVID-  
44  
45 444 19 pandemic, indicating a considerable prevalence of the condition. The finding highlights the  
46  
47 445 importance of optimizing the working hours per day, minimizing electronic device use before  
48  
49 446 bedtime, promoting risk perception toward COVID-19 infection, and developing workplace  
50  
51 447 coping strategies for stress, which play a substantial role in minimizing poor sleep quality. We  
52  
53 448 recommend future studies to account for different sectors such as telecommunication, healthcare,  
54  
55  
56  
57  
58  
59  
60

1  
2  
3 449 transportation, etc. with interventional study design and objectively measuring sleep quality  
4  
5 450 parameters.

6  
7 451

8  
9 452 **Data availability statement**

10  
11 453 All the data generated in this study are included in this manuscript. The data sets used and analyzed  
12  
13 454 to produce the current manuscript can be obtained from the corresponding author upon request via  
14  
15 455 e-mail address of [amensisahailu@gmail.com](mailto:amensisahailu@gmail.com).

16  
17  
18 456 **Ethics statements**

19  
20 457 **Patient consent for publication**

21  
22 458 Consent obtained directly from patient (s).

23  
24 459 **Ethics approval and consent to participate**

25  
26 460 Ethical approval was secured from the Institutional Ethical Review Board (IRB) of the University  
27  
28 461 of Gondar, College of Medicine and Health Sciences, Institute of Public Health (**Reference #:**  
29  
30 462 **IPH/1425/2021**). The study followed the tenets of the Declaration of Helsinki and also complied  
31  
32 463 with the ethical requirements set by the University of Gondar. Written informed consent was  
33  
34 464 obtained from each respondent before commencing data collection after an explanation of the  
35  
36 465 nature and possible consequences of the study. The information sheet that clearly shows the  
37  
38 466 research topic, the objectives of the study, confidentiality of the participant's responses, the study  
39  
40 467 benefits, and associated risks was prepared and presented. We removed any personal identifiers to  
41  
42 468 assure confidentiality of the participants and only anonymous data were used for interpretations.  
43  
44 469 Furthermore, since the data were collected during the COVID-19 pandemic, we implemented  
45  
46 470 infection prevention protocols including social distancing and wearing of facemasks.

47  
48 471 **Abbreviations**

49  
50 472 AOR=Adjusted Odds Ratio; CI= Confidence Interval; COVID-19= Corona virus disease 19;  
51  
52 473 COR= Crude Odds Ratio; ETB= Ethiopia Birr; OR= Odds Ratio; PSQI= Pittsburgh Sleep Quality  
53  
54 474 Index, SD= Standard Deviation; SQ= Sleep Quality; STATA= Statistical software for data science

55  
56 475 **Conflicting interests**

476 None declared.

## 477 **Funding**

478 The author of this study didn't receive funds from any funding organization. The cost of data  
479 collection tools and data collectors' fee was covered by the principal investigator, i.e., AHT.

## 480 **Author's contribution**

481 **AHT:** Initiated the concept of the research, wrote up the research proposal, analyzed the data  
482 involved in the presentation and interpretation process of results and discussions, and drafted the  
483 manuscript document and the corresponding author. Author read and approved the final  
484 manuscript.

## 485 **Acknowledgments**

486 I am very much thankful to all data collectors, supervisor, and study participants for their  
487 coordination in the study.

## 488 **References**

- 489 1. Landry GJ, Best JR, Liu-Ambrose T: **Measuring sleep quality in older adults: a comparison**  
490 **using subjective and objective methods.** *Frontiers in aging neuroscience* 2015, **7**:166.
- 491 2. Yang Y, Li W, Ma T-J, Zhang L, Hall BJ, Ungvari GS, Xiang Y-T: **Prevalence of poor sleep**  
492 **quality in perinatal and postnatal women: a comprehensive meta-analysis of observational**  
493 **studies.** *Frontiers in psychiatry* 2020, **11**:161.
- 494 3. Madrid-Valero JJ, Martínez-Selva JM, Couto BRd, Sánchez-Romera JF, Ordoñana JR: **Age and**  
495 **gender effects on the prevalence of poor sleep quality in the adult population.** *Gaceta sanitaria*  
496 2017, **31**:18-22.
- 497 4. Sateia MJ: **International classification of sleep disorders.** *Chest* 2014, **146**(5):1387-1394.
- 498 5. Buysse DJ, Angst J, Gamma A, Ajdacic V, Eich D, Rössler W: **Prevalence, course, and**  
499 **comorbidity of insomnia and depression in young adults.** *Sleep* 2008, **31**(4):473-480.
- 500 6. Paunio T, Korhonen T, Hublin C, Partinen M, Kivimäki M, Koskenvuo M, Kaprio J: **Longitudinal**  
501 **study on poor sleep and life dissatisfaction in a nationwide cohort of twins.** *American Journal*  
502 *of Epidemiology* 2009, **169**(2):206-213.
- 503 7. Aw SB, Teh BT, Ling GHT, Leng PC, Chan WH, Ahmad MH: **The covid-19 pandemic situation**  
504 **in malaysia: Lessons learned from the perspective of population density.** *International journal*  
505 *of environmental research and public health* 2021, **18**(12):6566.
- 506 8. Pinto J, van Zeller M, Amorim P, Pimentel A, Dantas P, Eusébio E, Neves A, Pipa J, Santa Clara  
507 E, Santiago T: **Sleep quality in times of Covid-19 pandemic.** *Sleep medicine* 2020, **74**:81-85.
- 508 9. Musa NA, Moy FM, Wong LP: **Prevalence and factors associated with poor sleep quality**  
509 **among secondary school teachers in a developing country.** *Industrial health* 2018.
- 510 10. Souza JcD, Sousa ICd, Belísio AS, Azevedo CVMd: **Sleep habits, daytime sleepiness and sleep**  
511 **quality of high school teachers.** *Psychology & Neuroscience* 2012, **5**:257-263.
- 512 11. Kottwitz MU, Gerhardt C, Pereira D, Iseli L, Elfering A: **Teacher's sleep quality: linked to social**  
513 **job characteristics?** *Industrial health* 2017.

- 1  
2  
3 514 12. Freitas AMC, Araújo TMD, Pinho PdS, Sousa CC, Oliveira PCS, Souza FdO: **Sleep quality and associated factors among professors.** *Revista Brasileira de Saúde Ocupacional* 2021, **46**.
- 4 515  
5 516 13. Teker AG, Luleci NE: **Sleep quality and anxiety level in employees.** *Northern clinics of Istanbul* 2018, **5(1):31**.
- 6 517  
7 518 14. Burdorf A, Porru F, Rugulies R: **The COVID-19 (Coronavirus) pandemic: consequences for occupational health.** *Scandinavian Journal of Work, Environment & Health* 2020, **46(3):229-230**.
- 8 519  
9 520 15. Stranges S, Tigbe W, Gómez-Olivé FX, Thorogood M, Kandala N-B: **Sleep problems: an emerging global epidemic? Findings from the INDEPTH WHO-SAGE study among more than 40,000 older adults from 8 countries across Africa and Asia.** *Sleep* 2012, **35(8):1173-1181**.
- 10 521  
11 522 16. Dumith SC, Meneghini KFD, Demenech LM: **Who are the individuals with the worst perceived quality of sleep? A population-based survey in southern Brazil.** *Preventive Medicine Reports* 2021, **21:101288**.
- 12 523  
13 524  
14 525  
15 526 17. Adams R, Appleton S, Taylor A, McEvoy D, Antic N: **Report to the sleep Health Foundation 2016 sleep health survey of Australian adults.** *Adelaide: The Adelaide Institute for Sleep Health & The University of Adelaide* 2016.
- 16 527  
17 528  
18 529 18. Watson N, Badr M, Belenky G, Bliwise D, Buxton O, Buysse D, Dinges D, Gangwisch J, Grandner M, Kushida C: **Consensus Conference Panel Non-Participating Observers American Academy of Sleep Medicine Staff (2015) Recommended amount of sleep for a healthy adult: a joint consensus statement of the American Academy of Sleep Medicine and Sleep Research Society.** *J Clin Sleep Med*, **11:591-592**.
- 19 530  
20 531  
21 532  
22 533  
23 534 19. Organization WH: **WHO technical meeting on sleep and health: Bonn Germany, 22–24 January 2004.** In: World Health Organization. Regional Office for Europe; 2004.
- 24 535  
25 536 20. Duran S, Erkin Ö: **Psychologic distress and sleep quality among adults in Turkey during the COVID-19 pandemic.** *Progress in Neuro-Psychopharmacology and Biological Psychiatry* 2021, **107:110254**.
- 26 537  
27 538  
28 539 21. Crepaldi T, Carvalhais J, Cotrim T: **Sleep Quality and Quality of Working Life Among Brazilian University Professors in Telework.** In: *Occupational and Environmental Safety and Health III*. edn. Edited by Arezes PM, Baptista JS, Carneiro P, Castelo Branco J, Costa N, Duarte J, Guedes JC, Melo RB, Miguel AS, Perestrelo G. Cham: Springer International Publishing; 2022: 661-669.
- 29 540  
30 541  
31 542  
32 543  
33 544 22. **Sleep-RSPH, availbel at <https://www.rsph.org.uk/our-work/policy/wellbeing/sleep.html>**
- 34  
35  
36 545  
37 546 23. Colten HR, Altevogt BM: **Extent and health consequences of chronic sleep loss and sleep disorders.** *Sleep disorders and sleep deprivation: an unmet public health problem* 2006:55-135.
- 38 547  
39 548 24. Roodbandi ASJ, Feyzi V, KHANJANI N, MOGHADAM SR, BAFGHI MS, MOGHADASI M, NOROUZI Z: **Sleep quality and sleepiness: a comparison between nurses with and without shift work, and university employees.** *International Journal of Occupational Hygiene* 2016, **8(4):230-236**.
- 40 549  
41 550  
42 551  
43 552 25. Chatlaong T, Pitanupong J, Wiwattanaworaset P: **Sleep quality and burnout syndrome among residents in training at the faculty of medicine, Prince of Songkla University.** *Siriraj Medical Journal* 2020, **72(4):307-314**.
- 44 553  
45 554  
46 555 26. Manzar MD, Bekele BB, Noohu MM, Salahuddin M, Albougami A, Spence DW, Pandi-Perumal SR, Bahammam AS: **Prevalence of poor sleep quality in the Ethiopian population: a systematic review and meta-analysis.** *Sleep and Breathing* 2020, **24(2):709-716**.
- 47 556  
48 557  
49 558 27. Huang Y, Zhao N: **Generalized anxiety disorder, depressive symptoms and sleep quality during COVID-19 outbreak in China: a web-based cross-sectional survey.** *Psychiatry research* 2020, **288:112954**.
- 50 559  
51 560  
52 561 28. Gualano MR, Lo Moro G, Voglino G, Bert F, Siliquini R: **Effects of Covid-19 lockdown on mental health and sleep disturbances in Italy.** *International journal of environmental research and public health* 2020, **17(13):4779**.
- 53 562  
54 563  
55 564  
56 565  
57  
58  
59  
60

- 1  
2  
3 564 29. Marelli S, Castelnuovo A, Somma A, Castronovo V, Mombelli S, Bottoni D, Leitner C, Fossati A,  
4 565 Ferini-Strambi L: **Impact of COVID-19 lockdown on sleep quality in university students and**  
5 566 **administration staff.** *Journal of Neurology* 2021, **268**(1):8-15.
- 6 567 30. Dowla SU: **Evaluating the effects of COVID-19 on mental health.** Brac University; 2021.
- 7 568 31. Rwigema P: **Impact of COVID-19 lockdowns on the education sector. The case of Rwanda.**  
8 569 *The Strategic Journal of Business & Change Management* 2021, **8**(1):150-169.
- 9 570 32. Salehinejad MA, Majidinezhad M, Ghanavati E, Kouestanian S, Vicario CM, Nitsche MA, Nejati  
10 571 V: **Negative impact of COVID-19 pandemic on sleep quantitative parameters, quality, and**  
11 572 **circadian alignment: implications for health and psychological well-being.** *EXCLI journal*  
12 573 2020, **19**:1297.
- 13 574 33. Patil A, Bhavya SC, Srivastava S: **Eyeing computer vision syndrome: Awareness, knowledge,**  
14 575 **and its impact on sleep quality among medical students.** *Industrial psychiatry journal* 2019,  
15 576 **28**(1):68.
- 16 577 34. Salehi SG, Hassani H, Mortezaipoor A, Sadeghniaat-Haghighi K: **Assessing of Sleepiness,**  
17 578 **Insomnia and Sleep Quality among University Students: Association between Computer Use**  
18 579 **and Sleep Quality.** *Annals of Military & Health Sciences Research* • Vol 2015, **13**(4).
- 19 580 35. Chisale P, Mzumara T, Afonne J: **Knowledge Attitude, perception and knowledge and practice**  
20 581 **of prevention practices of computer vision syndrome among mzuzu university academic staff.**  
21 582 *J Eye Vis* 2019, **2**(2):1-7.
- 22 583 36. Baker FC, Wolfson AR, Lee KA: **Association of sociodemographic, lifestyle, and health factors**  
23 584 **with sleep quality and daytime sleepiness in women: findings from the 2007 National Sleep**  
24 585 **Foundation “Sleep in America Poll”.** *Journal of women's health* 2009, **18**(6):841-849.
- 25 586 37. Gellis LA, Lichstein KL, Scarinci IC, Durrence HH, Taylor DJ, Bush AJ, Riedel BW:  
26 587 **Socioeconomic status and insomnia.** *Journal of abnormal psychology* 2005, **114**(1):111.
- 27 588 38. Ding D, Gebel K, Phongsavan P, Bauman AE, Merom D: **Driving: a road to unhealthy lifestyles**  
28 589 **and poor health outcomes.** *PloS one* 2014, **9**(6):e94602.
- 29 590 39. Kabrita CS, Hajjar-Muca TA, Duffy JF: **Predictors of poor sleep quality among Lebanese**  
30 591 **university students: association between evening typology, lifestyle behaviors, and sleep**  
31 592 **habits.** *Nature and science of sleep* 2014, **6**:11.
- 32 593 40. Shochat T: **Impact of lifestyle and technology developments on sleep.** *Nature and science of*  
33 594 *sleep* 2012, **4**:19.
- 34 595 41. Alonzo R, Hussain J, Stranges S, Anderson KK: **Interplay between social media use, sleep**  
35 596 **quality, and mental health in youth: A systematic review.** *Sleep Medicine Reviews* 2021,  
36 597 **56**:101414.
- 37 598 42. Berhanu H, Mossie A, Tadesse S, Geleta D: **Prevalence and associated factors of sleep quality**  
38 599 **among adults in Jimma Town, Southwest Ethiopia: a community-based cross-sectional study.**  
39 600 *Sleep disorders* 2018, **2018**.
- 40 601 43. Negussie BB, Emeria MS, Reta EY, Shiferaw BZ: **Sleep deprivation and associated factors**  
41 602 **among students of the Institute of Health in Jimma University, Southwest Ethiopia.** *Frontiers*  
42 603 *of Nursing* 2021, **8**(3):303-311.
- 43 604 44. Lin S-Y, Chung KKH: **Risk perception, perception of collective efficacy and sleep quality in**  
44 605 **Chinese adults during COVID-19 pandemic in Hong Kong: a cross-sectional study.**  
45 606 *International Journal of Environmental Research and Public Health* 2021, **18**(21):11533.
- 46 607 45. Amschler DH, McKenzie JF: **Perceived sleepiness, sleep habits and sleep concerns of public**  
47 608 **school teachers, administrators and other personnel.** *American Journal of Health Education*  
48 609 2010, **41**(2):102-109.
- 49 610 46. Alemayehu M, Nega A, Tegegne E, Mule Y: **Prevalence of self reported computer vision**  
50 611 **syndrome and associated factors among secretaries and data processors who are working in**  
51 612 **University of Gondar, Ethiopia.** *Journal of Biology, Agriculture and Healthcare* 2014, **4**(15).



- 1  
2  
3 613 47. Kabito GG, Wami SD, Chercos DH, Mekonnen TH: **Work-related Stress and Associated Factors among Academic Staffs at the University of Gondar, Northwest Ethiopia: An Institutionbased Cross-sectional Study.** *Ethiopian journal of health sciences* 2020, **30**(2).
- 4 614  
5 615  
6 616 48. Daniel WW, Cross CL: **Biostatistics: a foundation for analysis in the health sciences:** Wiley; 2018.
- 7 617  
8 618 49. Martínez-Mesa J, González-Chica DA, Bastos JL, Bonamigo RR, Duquia RP: **Sample size: how many participants do I need in my research?** *Anais brasileiros de dermatologia* 2014, **89**:609-615.
- 9 619  
10 620  
11 621 50. Buysse DJ, Reynolds III CF, Monk TH, Berman SR, Kupfer DJ: **The Pittsburgh Sleep Quality Index: a new instrument for psychiatric practice and research.** *Psychiatry research* 1989, **28**(2):193-213.
- 12 622  
13 623  
14 624 51. Salahuddin M, Maru TT, Kumalo A, Pandi-Perumal SR, Bahammam AS, Manzar MD: **Validation of the Pittsburgh sleep quality index in community dwelling Ethiopian adults.** *Health and quality of life outcomes* 2017, **15**(1):1-7.
- 15 625  
16 626  
17 627 52. Seidell JC, Flegal KM: **Assessing obesity: classification and epidemiology.** *British medical bulletin* 1997, **53**(2):238-252.
- 18 628  
19 629 53. Nakata A, Ikeda T, Takahashi M, Haratani T, Hojou M, Swanson NG, Fujioka Y, Araki S: **The prevalence and correlates of occupational injuries in small-scale manufacturing enterprises.** *Journal of occupational health* 2006, **48**(5):366-376.
- 20 630  
21 631  
22 632 54. Jemere T, Mossie A, Berhanu H, Yeshaw Y: **Poor sleep quality and its predictors among type 2 diabetes mellitus patients attending Jimma University Medical Center, Jimma, Ethiopia.** *BMC research notes* 2019, **12**(1):1-6.
- 23 633  
24 634  
25 635 55. Rolander B, Bellner A-L: **Experience of musculo-skeletal disorders, intensity of pain, and general conditions in work--the case of employees in non-private dental clinics in a county in southern Sweden.** *Work* 2001, **17**(1):65-73.
- 26 636  
27 637  
28 638 56. Negussie BB, Emeria MS, Reta EY, Shiferaw BZ: **Sleep deprivation and associated factors among students of the Institute of Health in Jimma University, Southwest Ethiopia.** *Frontiers of Nursing*, **8**(3):303-311.
- 29 639  
30 640  
31 641 57. Abdu Z, Hajure M: **Prevalence and Associated Factors of Poor Quality of Sleep among Prisoners in Mettu Town Prison, Oromia, South West Ethiopia, 2019.** *The Open Public Health Journal* 2020, **13**(1).
- 32 642  
33 643  
34 644 58. Azene ZN, Merid MW, Muluneh AG, Geberu DM, Kassa GM, Yenit MK, Tilahun SY, Gelaye KA, Mekonnen HS, Azageaw AW: **Adherence towards COVID-19 mitigation measures and its associated factors among Gondar City residents: A community-based cross-sectional study in Northwest Ethiopia.** *PloS one* 2020, **15**(12):e0244265.
- 35 645  
36 646  
37 647  
38 648 59. Macdonald S, MacIntyre P: **The generic job satisfaction scale: Scale development and its correlates.** *Employee Assistance Quarterly* 1997, **13**(2):1-16.
- 39 649  
40 650 60. The Marlin Company NH, CT, and the American Institute of Stress, Yonkers, NY,: **The Workplace Stress Scale™** Available at: <https://teorionline.files.wordpress.com/2011/04/unit-3-the-workplace-stress-scale.pdf> . Accessed on 10 June 2019.
- 41 651  
42 652  
43 653 61. Cohen S, Kamarck T, Mermelstein R: **Perceived stress scale.** *Measuring stress: A guide for health and social scientists* 1994, **10**(2):1-2.
- 44 654  
45 655 62. Birhanu TT, Salih MH, Abate HK: **Sleep Quality and Associated Factors Among Diabetes Mellitus Patients in a Follow-Up Clinic at the University of Gondar Comprehensive Specialized Hospital in Gondar, Northwest Ethiopia: A Cross-Sectional Study.** *Diabetes, metabolic syndrome and obesity: targets and therapy* 2020, **13**:4859.
- 46 656  
47 657  
48 658  
49 659 63. Wondie T, Molla A, Mulat H, Damene W, Bekele M, Madoro D, Yohannes K: **Magnitude and correlates of sleep quality among undergraduate medical students in Ethiopia: cross-sectional study.** *Sleep Science and Practice* 2021, **5**(1):1-8.
- 50 660  
51 661  
52 662 64. James BO, Omoaregba JO, Igberase OO: **Prevalence and correlates of poor sleep quality among medical students at a Nigerian university.** *Ann Nigerian Med* 2011, **5**(1):1-5.
- 53 663  
54  
55  
56  
57  
58  
59  
60

- 1  
2  
3 664 65. Smyth C: **The Pittsburgh sleep quality index (PSQI)**. In., vol. 25: SLACK Incorporated  
4 665 Thorofare, NJ; 1999: 10-10.
- 5 666 66. Mollayeva T, Thurairajah P, Burton K, Mollayeva S, Shapiro CM, Colantonio A: **The Pittsburgh  
6 667 sleep quality index as a screening tool for sleep dysfunction in clinical and non-clinical  
7 668 samples: A systematic review and meta-analysis**. *Sleep medicine reviews* 2016, **25**:52-73.
- 8 669 67. Zailinawati A, Teng C, Chung Y, Teow T, Lee P, Jagmohani K: **Daytime sleepiness and sleep  
9 670 quality among Malaysian medical students**. *The Medical journal of Malaysia* 2009, **64**(2):108-  
10 671 110.
- 11 672 68. Backhaus J, Junghanns K, Broocks A, Riemann D, Hohagen F: **Test-retest reliability and validity  
12 673 of the Pittsburgh Sleep Quality Index in primary insomnia**. *Journal of psychosomatic research*  
13 674 2002, **53**(3):737-740.
- 14 675 69. Bertolazi AN, Fagundes SC, Hoff LS, Dartora EG, da Silva Miozzo IC, de Barba MEF, Barreto  
15 676 SSM: **Validation of the Brazilian Portuguese version of the Pittsburgh sleep quality index**.  
16 677 *Sleep medicine* 2011, **12**(1):70-75.
- 17 678 70. Kwok KO, Li KK, Chan HHH, Yi YY, Tang A, Wei WI, Wong SYS: **Community responses  
18 679 during early phase of COVID-19 epidemic, Hong Kong**. *Emerging infectious diseases* 2020,  
19 680 **26**(7):1575.
- 20 681 71. Mekonnen TH, Abere G, Olkeba SW: **Risk Factors Associated with Upper Extremity  
21 682 Musculoskeletal Disorders among Barbers in Gondar Town, Northwest Ethiopia, 2018: A  
22 683 Cross-Sectional Study**. *Pain Research and Management* 2019, **2019**(2019):1-9.
- 23 684 72. Mekonnen TH, Yenealem DG: **Factors affecting healthcare utilization for low back pain among  
24 685 nurses in Gondar town, northwest Ethiopia, 2018: a cross-sectional study**. *BMC Res Notes*  
25 686 2019, **12**(185):1-6.
- 26 687 73. Meaza H, Temesgen MH, Redae G, Hailemariam TT, Alamer A: **Prevalence of Musculoskeletal  
27 688 Pain Among Academic Staff of Mekelle University, Ethiopia**. *Clinical Medicine Insights:  
28 689 Arthritis and Musculoskeletal Disorders* 2020, **13**:1179544120974671.
- 29 690 74. Etana G, Ayele M, Abdissa D, Gerbi A: **Prevalence of Work Related Musculoskeletal Disorders  
30 691 and Associated Factors Among Bank Staff in Jimma City, Southwest Ethiopia, 2019: An  
31 692 Institution-Based Cross-Sectional Study**. *Journal of Pain Research* 2021, **14**:2071.
- 32 693 75. Hosmer DW, Hjort NL: **Goodness-of-fit processes for logistic regression: simulation results**.  
33 694 *Statistics in medicine* 2002, **21**(18):2723-2738.
- 34 695 76. de Sousa AR, Santos RB, da Silva RM, Santos CCT, Lopes VC, Mussi FC: **Occupational stress  
35 696 and sleep quality in professors of the health area**. *Rev Rene* 2018(19):60.
- 36 697 77. Farah NM, Saw Yee T, Mohd Rasdi HF: **Self-reported sleep quality using the Malay version of  
37 698 the Pittsburgh sleep quality index (PSQI-M) in Malaysian adults**. *International journal of  
38 699 environmental research and public health* 2019, **16**(23):4750.
- 39 700 78. Vandewalle G, Archer SN, Guillaume C, Balteau E, Degueldre C, Luxen A, Dijk D-J, Maquet P:  
40 701 **Effects of light on cognitive brain responses depend on circadian phase and sleep homeostasis**.  
41 702 *Journal of biological rhythms* 2011, **26**(3):249-259.
- 42 703 79. Virtanen M, Ferrie JE, Gimeno D, Vahtera J, Elovainio M, Singh-Manoux A, Marmot MG,  
43 704 Kivimäki M: **Long working hours and sleep disturbances: the Whitehall II prospective cohort  
44 705 study**. *Sleep* 2009, **32**(6):737-745.
- 45 706 80. Jansen N, Kant I, van Amelsvoort L, Nijhuis F, van den Brandt P: **Need for recovery from work:  
46 707 evaluating short-term effects of working hours, patterns and schedules**. *Ergonomics* 2003,  
47 708 **46**(7):664-680.
- 48 709 81. Bannai A, Ukawa S, Tamakoshi A: **Long working hours and sleep problems among public  
49 710 junior high school teachers in Japan**. *Journal of occupational health* 2015:15-0053-OA.
- 50 711 82. Ferrie J, Gimeno D, Vahtera J, Elovainio M, Singh-Manoux A, Marmot M, Kivimäki M: **Long  
51 712 working hours and sleep disturbances: the Whitehall II prospective cohort study**. *Virtanen  
52 713 M. SLEEP MEDICINE*:129.
- 53 714 83. Byrd E: **The Effect of the Use of An Electronic Device Before Bed on Sleep Quality**. 2019.

- 1  
2  
3 715 84. Walsh NA, Rodriguez N, Repa LM, King E, Garland SN: **Associations between device use before**  
4 716 **bed, mood disturbance, and insomnia symptoms in young adults.** *Sleep Health* 2020, **6(6):822-**  
5 717 **827.**
- 6 718 85. Fossum IN, Nordnes LT, Storemark SS, Bjorvatn B, Pallesen S: **The association between use of**  
7 719 **electronic media in bed before going to sleep and insomnia symptoms, daytime sleepiness,**  
8 720 **morningness, and chronotype.** *Behavioral sleep medicine* 2014, **12(5):343-357.**
- 9 721 86. Salfi F, Amicucci G, Corigliano D, D'Atri A, Viselli L, Tempesta D, Ferrara M: **Changes of**  
10 722 **evening exposure to electronic devices during the COVID-19 lockdown affect the time course**  
11 723 **of sleep disturbances.** *Sleep* 2021, **44(9):zab080.**
- 12 724 87. Shechter A, Kim EW, St-Onge M-P, Westwood AJ: **Blocking nocturnal blue light for insomnia:**  
13 725 **A randomized controlled trial.** *J Psychiatr Res* 2018, **96:196-202.**
- 14 726 88. Sobaih AEE, Hasanein AM, Abu Elnasr AE: **Responses to COVID-19 in Higher Education:**  
15 727 **Social Media Usage for Sustaining Formal Academic Communication in Developing**  
16 728 **Countries.** *Sustainability* 2020, **12(16):6520.**
- 17 729 89. Yan J, Kim S, Zhang SX, Foo M-D, Alvarez-Risco A, Del-Aguila-Arcentales S, Yáñez JA:  
18 730 **Hospitality workers' COVID-19 risk perception and depression: A contingent model based**  
19 731 **on transactional theory of stress model.** *International Journal of Hospitality Management* 2021,  
20 732 **95:102935.**
- 21 733 90. Iorga M, Iurcov R, Pop L-M: **The Relationship between Fear of Infection and Insomnia among**  
22 734 **Dentists from Oradea Metropolitan Area during the Outbreak of Sars-CoV-2 Pandemic.**  
23 735 *Journal of Clinical Medicine* 2021, **10(11):2494.**
- 24 736 91. Kesintha A, Rampal L, Sherina M, Kalaiselvam T: **Prevalence and predictors of poor sleep**  
25 737 **quality among secondary school students in Gombak District, Selangor.** *Med J Malaysia* 2018,  
26 738 **73(1):32-40.**
- 27 739 92. Herawati K, Gayatri D: **The correlation between sleep quality and levels of stress among**  
28 740 **students in Universitas Indonesia.** *Enfermeria clinica* 2019, **29:357-361.**
- 29 741 93. Hirotsu C, Tufik S, Andersen ML: **Interactions between sleep, stress, and metabolism: From**  
30 742 **physiological to pathological conditions.** *Sleep Science* 2015, **8(3):143-152.**
- 31 743 94. Han KS, Kim L, Shim I: **Stress and sleep disorder.** *Experimental neurobiology* 2012, **21(4):141.**
- 32  
33  
34  
35 744  
36  
37 745  
38  
39 746  
40 747  
41  
42  
43  
44  
45  
46  
47  
48  
49  
50  
51  
52  
53  
54  
55  
56  
57  
58  
59  
60

Date of interview (DD/MM/YYYY): \_\_\_/\_\_\_/\_\_\_

Questionnaire identification number \_\_\_\_\_

Name of the campus \_\_\_\_\_

Department \_\_\_\_\_

| Part 1. Socio-demographic information |                                      |                                                                                                |      |
|---------------------------------------|--------------------------------------|------------------------------------------------------------------------------------------------|------|
| Code                                  | Questions                            | Response (circle the appropriate option)                                                       | Skip |
| 101                                   | What is your age?                    | _____ years.                                                                                   |      |
| 102                                   | What is your sex?                    | 1. Female<br>2. Male                                                                           |      |
| 103                                   | What is your religion?               | 1. Orthodox Christian<br>2. Muslim<br>3. Protestant<br>4. Catholic<br>5. other (specify) _____ |      |
| 104                                   | What is your current marital status? | 1. Married<br>2. Single<br>3. Divorced<br>4. Widowed<br>5. Separated                           |      |
| 105                                   | What is your level of education?     | 1. Degree<br>2. Master<br>3. Ph.D.<br>4. Other (specify) _____                                 |      |
| 106                                   | Monthly salary in Ethiopia birr?     | _____ Ethiopian birr (ETB)                                                                     |      |
| 107                                   | Years of experience                  | _____ (years)                                                                                  |      |

## Part II. Poor sleep quality assessment (PSQI)

The Pittsburgh Sleep Quality Index (PSQI) is an effective instrument used to measure the quality and patterns of sleep in adults. It differentiates “poor” from “good” sleep quality by measuring seven areas (components): subjective sleep quality, sleep latency, sleep duration, habitual sleep efficiency, sleep disturbances, use of sleeping medications, and daytime dysfunction over the last month.

### INSTRUCTIONS:

The following questions relate to your usual sleep habits during the past month only. Your answers should indicate the most accurate reply for the majority of days and nights in the past month. Please answer all questions.

### During the past month,

1. When have you usually gone to bed? \_\_\_\_\_
2. How long (in minutes) has it taken you to fall asleep each night? \_\_\_\_\_
3. What time have you usually gotten up in the morning? \_\_\_\_\_
4. A. How many hours of actual sleep did you get at night? \_\_\_\_\_  
B. How many hours were you in bed? \_\_\_\_\_

For each of the remaining questions, check the one best response. Please answer all questions. Mark “✓” your best answers.

| 5. During the past month, how often have you had trouble sleeping because you                                                       | Not during the past month (0) | Less than once a week(1) | Once or twice a week (2) | Three or more times a week (3) |
|-------------------------------------------------------------------------------------------------------------------------------------|-------------------------------|--------------------------|--------------------------|--------------------------------|
| A. Cannot get to sleep within 30 minutes                                                                                            |                               |                          |                          |                                |
| B. Wake up in the middle of the night or early morning                                                                              |                               |                          |                          |                                |
| C. Have to get up to use the bathroom                                                                                               |                               |                          |                          |                                |
| D. Cannot breathe comfortably                                                                                                       |                               |                          |                          |                                |
| E. Cough or snore loudly                                                                                                            |                               |                          |                          |                                |
| F. Feel too cold                                                                                                                    |                               |                          |                          |                                |
| G. Feel too hot                                                                                                                     |                               |                          |                          |                                |
| H. Have bad dreams                                                                                                                  |                               |                          |                          |                                |
| I. Have pain                                                                                                                        |                               |                          |                          |                                |
| J. Other reason (s), please describe, including how often you have had trouble sleeping because of this reason (s):                 |                               |                          |                          |                                |
| 6. During the past month, how often have you taken medicine (prescribed or “over the counter”) to help you sleep?                   |                               |                          |                          |                                |
| 7. During the past month, how often have you had trouble staying awake while driving, eating meals, or engaging in social activity? |                               |                          |                          |                                |
| 8. During the past month, how much of a problem has it been for you to keep up enthusiasm to get things done?                       |                               |                          |                          |                                |
| 9. During the past month, how would you rate your sleep quality overall?                                                            | Very good(0)                  | Fairly good(1)           | Fairly bad(2)            | Very bad (3)                   |

**Scoring method of PSQI**

- Component 1** #9 Score C1 \_\_\_\_
- Component 2** #2 Score (<15min (0), 16-30min (1), 31-60 min (2), >60min (3))  
+ #5a Score (if sum is equal 0=0; 1-2=1; 3-4=2; 5-6=3) C2 \_\_\_\_
- Component 3** #4 Score (>7(0), 6-7 (1), 5-6 (2), <5 (3)) C3 \_\_\_\_
- Component 4** (total # of hours asleep) / (total # of hours in bed) x 100  
>85%=0, 75%-84%=1, 65%-74%=2, <65%=3 C4 \_\_\_\_
- Component 5** # sum of scores 5b to 5j (0=0; 1-9=1; 10-18=2; 19-27=3) C5 \_\_\_\_
- Component 6** #6 Score C6 \_\_\_\_
- Component 7** #7 Score + #8 score (0=0; 1-2=1; 3-4=2; 5-6=3) C7 \_\_\_\_

Add the seven component scores together \_\_\_\_\_ **Global PSQI** \_\_\_\_\_

**A total score of “5” or greater is indicative of poor sleep quality.**

**If you scored “5” or more, it is suggested that you discuss your sleep habits with a healthcare provider**

| <b>Part III. Behavioral related characteristics</b> |                                                                                                                                         |                                                                                          |                                |
|-----------------------------------------------------|-----------------------------------------------------------------------------------------------------------------------------------------|------------------------------------------------------------------------------------------|--------------------------------|
| <b>Code</b>                                         | <b>Questions</b>                                                                                                                        | <b>Response code</b>                                                                     | <b>Skip</b>                    |
|                                                     | Your weight in kilogram (kg)                                                                                                            | _____ kg                                                                                 |                                |
|                                                     | Your height in meter (m)                                                                                                                | _____ m                                                                                  |                                |
|                                                     | Working hours per day?                                                                                                                  | _____ (Hours/day)                                                                        |                                |
| 401                                                 | Do you Smoke cigarette?                                                                                                                 | 1. Yes<br>2. No                                                                          | <b>If No skip to Q NO. 403</b> |
| 402                                                 | If your answer is <b>yes</b> for question, number 401 how many cigarettes do you smoking per day?                                       | _____ sticks<br>_____ packet                                                             |                                |
| 403                                                 | Do you consume any kind of alcohol at least twice per week?                                                                             | 1. Yes<br>2. No                                                                          |                                |
| 404                                                 | Do you experience of chewing khat in the past one month?                                                                                | 1. Yes<br>2. No                                                                          | <b>If No skip to Q NO. 406</b> |
| 405                                                 | If <b>yes</b> for question number 404, how frequently chew khat?                                                                        | 1. Daily.<br>2. Once during 2 or 3 days<br>3. Once in a week.                            |                                |
|                                                     | Do you have habit of doing any kind of physical exercise?                                                                               | 3. Yes<br>4. No                                                                          | <b>If No skip to Q NO. 406</b> |
|                                                     | If <b>yes</b> for question number 404, how frequently doing physical exercise?                                                          | 1. Daily.<br>2. Once in a week.<br>3. Two times per week<br>4. Three and above in a week |                                |
|                                                     | For how much you are doing the exercise?                                                                                                | _____ minute                                                                             |                                |
| 408                                                 | Do you have a habit of taking break (after 1-2 hours of continuous work)?                                                               | 1. Yes<br>2. No                                                                          | <b>If No skip to Q NO. 410</b> |
| 409                                                 | If the answer for question 408 is ' <b>yes</b> ', for how many minute after work?                                                       | _____ minute                                                                             |                                |
| 413                                                 | Do you use/watch visual display technologies/terminals e.g. television, computer, tablet, smartphone etc. in bed before going to sleep? | 1. Yes<br>2. No                                                                          | <b>If No skip to Q NO. 415</b> |
| 414                                                 | If question 413 ' <b>yes</b> ' mention electronic device you used frequently?                                                           | _____                                                                                    |                                |
|                                                     | What is average hours you used per day                                                                                                  | _____ hours./day                                                                         |                                |
| 417                                                 | Do you have medical history of systemic illness?                                                                                        | 1. Yes<br>2. No                                                                          | <b>If No skip to Q NO. 501</b> |
| 418                                                 | If ' <b>yes</b> ' for question 421;                                                                                                     | specify disease _____                                                                    |                                |
|                                                     | Dou you doing high-loaded work?                                                                                                         | 1. Never<br>2. Sometimes<br>3. Always                                                    |                                |

|  |                                                         |                                                  |  |
|--|---------------------------------------------------------|--------------------------------------------------|--|
|  | How do you rate your relationship with your colleagues? | 1. Very bad<br>2. Bad<br>3. Good<br>4. Very good |  |
|--|---------------------------------------------------------|--------------------------------------------------|--|

#### Part VI: Risk perception of COVID-19 infection

##### (assuming no preventive measure)

605. How likely you will be infected?

1 = Very likely; 2 = Likely; 3 = Neutral; 4 = Unlikely; 5 = Very unlikely

606. How likely your families will be infected?

1 = Very likely; 2 = Likely; 3 = Neutral; 4 = Unlikely; 5 = Very unlikely

##### Perceived severity

607. Seriousness of symptoms caused by SARS-CoV-19

1 = Very serious; 2 = Serious; 3 = Neutral; 4 = Not serious; 5 = Not serious at all

608. Chance of having COVID-19 cured

1 = Very low; 2 = Low; 3 = Neutral; 4 = High; 5 = Very high

609. Chance of survival if infected with COVID-19.

1 = Very low; 2 = Low; 3 = Neutral; 4 = High; 5 = Very high

#### Part IV: Psychosocial factors

##### Questions to measure job stress (Q 401-408)

| S. No | Questions /variables                                                                          | Job stress score |        |            |       |            |
|-------|-----------------------------------------------------------------------------------------------|------------------|--------|------------|-------|------------|
|       |                                                                                               | Never            | Rarely | Some times | Often | Very often |
| 401   | Conditions at work are unpleasant or sometimes even unsafe.                                   | 1                | 2      | 3          | 4     | 5          |
| 402   | I feel that my job is negatively affecting my physical or emotional wellbeing                 | 1                | 2      | 3          | 4     | 5          |
| 403   | I have high loaded work to do and/or too many unreasonable deadlines.                         | 1                | 2      | 3          | 4     | 5          |
| 404   | I find it difficult to express my opinion or feelings about my jobconditions to my superiors. | 1                | 2      | 3          | 4     | 5          |
| 405   | I feel that job pressures interfere with my family or personal life.                          | 1                | 2      | 3          | 4     | 5          |
| 406   | I have adequate control or input over my work duties.                                         | 5                | 4      | 3          | 2     | 1          |

| 407                                               | I receive appropriate recognition or rewards for good performance.       | 5                      | 4            | 3       | 2         | 1              |
|---------------------------------------------------|--------------------------------------------------------------------------|------------------------|--------------|---------|-----------|----------------|
| 408                                               | I am able to utilize my skills and talents to the fullest extent at work | 5                      | 4            | 3       | 2         | 1              |
| Questions to measure job satisfaction (Q 409-418) |                                                                          |                        |              |         |           |                |
| S. No                                             | Questions /variables                                                     | Job satisfaction score |              |         |           |                |
|                                                   |                                                                          | Very dissatisfied      | Dissatisfied | Neutral | Satisfied | Very satisfied |
| 409                                               | I receive recognition for a job well done.                               | 1                      | 2            | 3       | 4         | 5              |
| 410                                               | I feel close to the people at work.                                      | 1                      | 2            | 3       | 4         | 5              |
| 411                                               | I feel good about working at this company.                               | 1                      | 2            | 3       | 4         | 5              |
| 412                                               | I feel secure about my job.                                              | 1                      | 2            | 3       | 4         | 5              |
| 413                                               | I believe management is concerned about me.                              | 1                      | 2            | 3       | 4         | 5              |
| 414                                               | On the whole, I believe work is good for my physical health              | 1                      | 2            | 3       | 4         | 5              |
| 415                                               | My wages are good.                                                       | 1                      | 2            | 3       | 4         | 5              |
| 416                                               | All my talents and skills are used at work.                              | 1                      | 2            | 3       | 4         | 5              |
| 417                                               | I get along with my supervisors.                                         | 1                      | 2            | 3       | 4         | 5              |
| 418                                               | I feel good about my job                                                 | 1                      | 2            | 3       | 4         | 5              |

The End

Thank you



1  
2  
3  
4  
5  
6  
7  
8  
9  
10  
11  
12  
13  
14  
15  
16  
17  
18  
19  
20  
21  
22  
23  
24  
25  
26  
27  
28  
29  
30  
31  
32  
33  
34  
35  
36  
37  
38  
39  
40  
41  
42  
43  
44  
45  
46  
47  
48  
49  
50  
51  
52  
53  
54  
55  
56  
57  
58  
59  
60

For peer review only

STROBE Statement—Checklist of items that should be included in reports of *cross-sectional studies*

|                           | Item No | Recommendation                                                                                                                                                                                      | Page No  |
|---------------------------|---------|-----------------------------------------------------------------------------------------------------------------------------------------------------------------------------------------------------|----------|
| <b>Title and abstract</b> | 1       | (a) Indicate the study's design with a commonly used term in the title or the abstract                                                                                                              | 2        |
|                           |         | (b) Provide in the abstract an informative and balanced summary of what was done and what was found                                                                                                 | 2        |
| <b>Introduction</b>       |         |                                                                                                                                                                                                     |          |
| Background/rationale      | 2       | Explain the scientific background and rationale for the investigation being reported                                                                                                                | 3 to 5   |
| Objectives                | 3       | State specific objectives, including any prespecified hypotheses                                                                                                                                    | 4        |
| <b>Methods</b>            |         |                                                                                                                                                                                                     |          |
| Study design              | 4       | Present key elements of study design early in the paper                                                                                                                                             | 5        |
| Setting                   | 5       | Describe the setting, locations, and relevant dates, including periods of recruitment, exposure, follow-up, and data collection                                                                     | 5        |
| Participants              | 6       | (a) Give the eligibility criteria, and the sources and methods of selection of participants                                                                                                         | 5        |
| Variables                 | 7       | Clearly define all outcomes, exposures, predictors, potential confounders, and effect modifiers. Give diagnostic criteria, if applicable                                                            | 6 to 7   |
| Data sources/ measurement | 8*      | For each variable of interest, give sources of data and details of methods of assessment (measurement). Describe comparability of assessment methods if there is more than one group                | 8 to 9   |
| Bias                      | 9       | Describe any efforts to address potential sources of bias                                                                                                                                           | 10       |
| Study size                | 10      | Explain how the study size was arrived at                                                                                                                                                           |          |
| Quantitative variables    | 11      | Explain how quantitative variables were handled in the analyses. If applicable, describe which groupings were chosen and why                                                                        |          |
| Statistical methods       | 12      | (a) Describe all statistical methods, including those used to control for confounding                                                                                                               | 10       |
|                           |         | (b) Describe any methods used to examine subgroups and interactions                                                                                                                                 | 10       |
|                           |         | (c) Explain how missing data were addressed                                                                                                                                                         |          |
|                           |         | (d) If applicable, describe analytical methods taking account of sampling strategy                                                                                                                  |          |
|                           |         | (e) Describe any sensitivity analyses                                                                                                                                                               |          |
| <b>Results</b>            |         |                                                                                                                                                                                                     |          |
| Participants              | 13*     | (a) Report numbers of individuals at each stage of study—e.g. numbers potentially eligible, examined for eligibility, confirmed eligible, included in the study, completing follow-up, and analysed | 5        |
|                           |         | (b) Give reasons for non-participation at each stage                                                                                                                                                |          |
|                           |         | (c) Consider use of a flow diagram                                                                                                                                                                  |          |
| Descriptive data          | 14*     | (a) Give characteristics of study participants (e.g. demographic, clinical, social) and information on exposures and potential confounders                                                          | 11 to 13 |
|                           |         | (b) Indicate number of participants with missing data for each variable of interest                                                                                                                 |          |
| Outcome data              | 15*     | Report numbers of outcome events or summary measures                                                                                                                                                | 14 to 15 |

|                                                 |                          |    |                                                                                                                                                                                                                                                                                                                                                                                                               |          |
|-------------------------------------------------|--------------------------|----|---------------------------------------------------------------------------------------------------------------------------------------------------------------------------------------------------------------------------------------------------------------------------------------------------------------------------------------------------------------------------------------------------------------|----------|
| 1<br>2<br>3<br>4<br>5<br>6<br>7<br>8<br>9<br>10 | Main results             | 16 | (a) Give unadjusted estimates and, if applicable, confounder-adjusted estimates and their precision (eg, 95% confidence interval). Make clear which confounders were adjusted for and why they were included<br>(b) Report category boundaries when continuous variables were categorized<br>(c) If relevant, consider translating estimates of relative risk into absolute risk for a meaningful time period | 11       |
| 11<br>12<br>13                                  | Other analyses           | 17 | Report other analyses done—eg analyses of subgroups and interactions, and sensitivity analyses                                                                                                                                                                                                                                                                                                                |          |
| 14                                              | <b>Discussion</b>        |    |                                                                                                                                                                                                                                                                                                                                                                                                               |          |
| 15                                              | Key results              | 18 | Summarise key results with reference to study objectives                                                                                                                                                                                                                                                                                                                                                      | 14       |
| 16<br>17<br>18<br>19                            | Limitations              | 19 | Discuss limitations of the study, taking into account sources of potential bias or imprecision. Discuss both direction and magnitude of any potential bias                                                                                                                                                                                                                                                    | 3        |
| 20<br>21<br>22<br>23                            | Interpretation           | 20 | Give a cautious overall interpretation of results considering objectives, limitations, multiplicity of analyses, results from similar studies, and other relevant evidence                                                                                                                                                                                                                                    | 18 to 20 |
| 24<br>25                                        | Generalisability         | 21 | Discuss the generalisability (external validity) of the study results                                                                                                                                                                                                                                                                                                                                         |          |
| 26                                              | <b>Other information</b> |    |                                                                                                                                                                                                                                                                                                                                                                                                               |          |
| 27<br>28<br>29<br>30                            | Funding                  | 22 | Give the source of funding and the role of the funders for the present study and, if applicable, for the original study on which the present article is based                                                                                                                                                                                                                                                 | 21       |

\*Give information separately for exposed and unexposed groups.

**Note:** An Explanation and Elaboration article discusses each checklist item and gives methodological background and published examples of transparent reporting. The STROBE checklist is best used in conjunction with this article (freely available on the Web sites of PLoS Medicine at <http://www.plosmedicine.org/>, Annals of Internal Medicine at <http://www.annals.org/>, and Epidemiology at <http://www.epidem.com/>). Information on the STROBE Initiative is available at [www.strobe-statement.org](http://www.strobe-statement.org).

# BMJ Open

## Risk Factors for the Prevalence of Poor Sleep Quality in Lecturers During COVID-19 Pandemic in Ethiopia: an institution-based cross-sectional study

|                                 |                                                                                                                                                                                                                                                                                                                                                                                                                                                     |
|---------------------------------|-----------------------------------------------------------------------------------------------------------------------------------------------------------------------------------------------------------------------------------------------------------------------------------------------------------------------------------------------------------------------------------------------------------------------------------------------------|
| Journal:                        | <i>BMJ Open</i>                                                                                                                                                                                                                                                                                                                                                                                                                                     |
| Manuscript ID                   | bmjopen-2022-066024.R2                                                                                                                                                                                                                                                                                                                                                                                                                              |
| Article Type:                   | Original research                                                                                                                                                                                                                                                                                                                                                                                                                                   |
| Date Submitted by the Author:   | 24-Sep-2022                                                                                                                                                                                                                                                                                                                                                                                                                                         |
| Complete List of Authors:       | Hailu Tesfaye, Amensisa; University of Gondar College of Medicine and Health Sciences, Environmental and Occupational Health and Safety<br>Alemayehu, M; University of Gondar College of Medicine and Health Sciences, Environmental and Occupational Health and Safety<br>Abere, Giziew; University of Gondar, ;<br>Kabito, Gebisa; University of Gondar College of Medicine and Health Sciences, Environmental and Occupational Health and Safety |
| <b>Primary Subject Heading</b>: | Public health                                                                                                                                                                                                                                                                                                                                                                                                                                       |
| Secondary Subject Heading:      | Epidemiology, Occupational and environmental medicine, Health services research                                                                                                                                                                                                                                                                                                                                                                     |
| Keywords:                       | Sleep medicine < ANAESTHETICS, COVID-19, Epidemiology < INFECTIOUS DISEASES, OCCUPATIONAL & INDUSTRIAL MEDICINE                                                                                                                                                                                                                                                                                                                                     |
|                                 |                                                                                                                                                                                                                                                                                                                                                                                                                                                     |

SCHOLARONE™  
Manuscripts



I, the Submitting Author has the right to grant and does grant on behalf of all authors of the Work (as defined in the below author licence), an exclusive licence and/or a non-exclusive licence for contributions from authors who are: i) UK Crown employees; ii) where BMJ has agreed a CC-BY licence shall apply, and/or iii) in accordance with the terms applicable for US Federal Government officers or employees acting as part of their official duties; on a worldwide, perpetual, irrevocable, royalty-free basis to BMJ Publishing Group Ltd ("BMJ") its licensees and where the relevant Journal is co-owned by BMJ to the co-owners of the Journal, to publish the Work in this journal and any other BMJ products and to exploit all rights, as set out in our [licence](#).

The Submitting Author accepts and understands that any supply made under these terms is made by BMJ to the Submitting Author unless you are acting as an employee on behalf of your employer or a postgraduate student of an affiliated institution which is paying any applicable article publishing charge ("APC") for Open Access articles. Where the Submitting Author wishes to make the Work available on an Open Access basis (and intends to pay the relevant APC), the terms of reuse of such Open Access shall be governed by a Creative Commons licence – details of these licences and which [Creative Commons](#) licence will apply to this Work are set out in our licence referred to above.

Other than as permitted in any relevant BMJ Author's Self Archiving Policies, I confirm this Work has not been accepted for publication elsewhere, is not being considered for publication elsewhere and does not duplicate material already published. I confirm all authors consent to publication of this Work and authorise the granting of this licence.

1  
2  
3 1 **Risk Factors for the Prevalence of Poor Sleep Quality in Lecturers During COVID-19**  
4 **Pandemic in Ethiopia: an institution-based cross-sectional study**  
5 2

6  
7 3 Amensisa Hailu Tesfaye<sup>1\*</sup>, Mekuriaw Alemayehu<sup>1</sup>, Giziew Aber<sup>1</sup>, and Gebisa Guyasa Kabito<sup>1</sup>

8  
9  
10 4 <sup>1</sup>Department of Environmental and Occupational Health and Safety, Institute of Public Health,  
11 5 College of Medicine and Health Sciences, University of Gondar, Gondar, Ethiopia

12  
13  
14 6 **E-mail addresses:**

15  
16 7 **Email address of authors:** Amensisa Hailu Tesfaye: [amensisahailu@gmail.com](mailto:amensisahailu@gmail.com)

17  
18 8 Mekuriaw Alemayehu: [mekuriaw04@gmail.com](mailto:mekuriaw04@gmail.com)

19  
20 9 Giziew Aber: [gabere2010@yahoo.com](mailto:gabere2010@yahoo.com)

21  
22  
23 10 Gebisa Guyasa Kabito: [gebeguyasa4@gmail.com](mailto:gebeguyasa4@gmail.com)

24  
25  
26 11 **\*Corresponding author:** Amensisa Hailu Tesfaye, Department of Environmental and  
27 12 Occupational Health and safety, Institute of Public Health, College of Medicine and Health  
28 13 Sciences, University of Gondar, Gondar, Ethiopia, Email: [amensisahailu@gmail.com](mailto:amensisahailu@gmail.com)

## 24 **Abstract**

25 **Objective:** This study was conducted to assess the prevalence and risk factors of poor sleep quality  
26 among the University of Gondar academic staff, Ethiopia.

27 **Design:** An institution-based cross-sectional study was conducted from March to April 2021. A  
28 validated self-administered, standardized Pittsburgh Sleep Quality Index was used to quantify the  
29 amount of self-reported poor sleep quality. The collected data were entered into EpiData version  
30 4.6 and analyzed using STATA version 14 software. Binary logistic regressions were computed to  
31 determine the association between variables. The association was determined using an adjusted  
32 Odds ratio (AOR) with a 95% confidence interval (CI) at a p-value of < 0.05.

33 **Setting:** The study was conducted at the University of Gondar, Northwestern Ethiopia.

34 **Participants:** Six hundred and seven lecturers participated in this study.

35 **Outcome measures:** The primary outcome is the prevalence of poor sleep quality, which was  
36 measured using the Pittsburgh Sleep Quality Index (PSQI).

37 **Results:** Overall response rate was 95.60% (N = 607). The age of the participants ranges from 21  
38 to 70 with a mean of 32.39 (SD  $\pm$ 6.80) years. The magnitude of poor sleep quality during the  
39 COVID-19 pandemic in the last month was 60.30% [95% CI (56.28%-64.21%)]. Working > 10  
40 hours per day [AOR= 2.19, 95% CI (1.16, 4.27)], electronic device use before bedtime  
41 [AOR=1.53, 95% CI (1.04, 2.27)], high-risk perception of COVID-19 infections [AOR =1.60,  
42 95% CI (1.04, 2.46)], and perceived job stress [AOR = 2.15 (95% CI, (1.50, 3.08))] were risk factors  
43 for poor sleep quality.

44 **Conclusion:** The study revealed that the prevalence of poor sleep quality was high during the  
45 COVID-19 pandemic. The finding highlights the importance of optimizing the working hours per  
46 day, minimizing electronic device use before bedtime, promoting risk perception toward COVID-  
47 19 infection, and developing workplace coping strategies for stress, which play a substantial role  
48 in minimizing poor sleep quality.

49 **Keywords:** Sleep quality, Poor sleep, Academic staff, Lectures, COVID-19, Ethiopia

## 52 **Strengths and limitations of this study**

- 53 • The study has focused on one of the most potential groups affected by poor sleeping quality,  
54 particularly during COVID-19.
- 55 • This study is the first in its kind in exploring the magnitude and factors influencing poor sleep  
56 quality among academic staff in Ethiopia.
- 57 • Using the Pittsburgh Sleep Quality Index (PSQI) is an effective instrument used to measure  
58 the quality and patterns of sleep in adults.
- 59 • The study has limitations due to the cross-sectional nature of the data; it does not show a  
60 temporal relationship between independent variables and the outcome variable.
- 61 • The report of poor sleep quality may be underestimated or overstated because it relies on lecturers'  
62 subjective reports rather than objective measurements like actigraphy and polysomnography.

## 63 **Background**

64 Scholars describe sleep quality (SQ) as "one's perception that they fall asleep easily, sleep for a  
65 sufficient amount of time so that they wake up feeling rested, and can get through their day without  
66 experiencing excessive daytime sleepiness". An individual's subjective perception of his or her  
67 sleep can be evaluated using both subjective and objective methods [1]. The subjective method,  
68 Pittsburgh Sleep Quality Index (PSQI) is a widely used questionnaire to measure sleep quality [2].  
69 General health and quality of life are directly correlated with sleep quality [3]. Sleep disorders  
70 involve problems with the quality, timing, duration, and amount of sleep [4]. Poor sleep quality is  
71 a global phenomenon, which leads to poor health, increased risk of mortality, hormonal and  
72 biochemical changes, higher health care costs, increased use of health resources, absenteeism, and  
73 increased risk of psychological morbidity and burnout [5, 6]. Poor SQ has been a typical  
74 occurrence among the various working population during the COVID-19 pandemic and is regarded  
75 as a public health crisis that frequently goes undetected, underreported, and has very large  
76 economic impacts [7, 8]. Teaching has been identified as a profession associated with a high risk  
77 of poor sleep quality [9-11]; however, little research has been conducted to quantify the prevalence  
78 and risk factors of poor sleep quality among university academic staff worldwide [12, 13].

79 Academic staffs are at a higher risk of poor SQ, burnout, depression, stress, and anxiety as a result  
80 of the current COVID-19 pandemic, which has serious consequences on occupational health both



1  
2  
3 81 now and in the future [14]. Likewise, the World Health Organization (WHO) has classified poor  
4 82 sleep quality as a public health issue that exacerbates the risk of disease and death [15]. Poor SQ  
5 83 also has significant economic consequences. In the USA, for example, the annual costs of poor  
6 84 sleep have been estimated to be as high as US\$16 billion in healthcare costs and US\$50 billion in  
7 85 lost productivity [16]. In Australia, the costs were estimated to be approximately US\$1.8 billion  
8 86 for the health system and US\$66.3 billion for financial loss and decreased well-being [17-19].

9  
10  
11  
12  
13  
14 87 The prevalence of poor sleep quality was increased during the COVID-19 period.[20]. A couple  
15 88 of studies from Brazilian [12, 21], documented that 61.3% and 44.2% of university academic staff  
16 89 reported poor sleep quality. Scientific investigation showed that four out of ten people do not get  
17 90 enough sleep, and one in five sleeps poorly most nights, making poor sleep the second most  
18 91 common health complaint after pain [22, 23]. According to a study done in Iran [24], 79.6%  
19 92 (n=133) of university staff reported having poor sleep quality. A similar finding was also found in  
20 93 a study conducted in Thailand [25], where 78.3% of respondents experienced poor sleep quality.  
21 94 So far, epidemiological data from Turkey indicated that 55.1% of adults had poor sleep quality  
22 95 [20]. In Ethiopia, the pooled prevalence of poor sleep quality was 53% among general populations  
23 96 and university students, with incidences ranging from 26% to 66.2% [26]. However, studies on  
24 97 sleep quality, particularly among university academic staff, are lacking.

25  
26  
27  
28  
29  
30  
31  
32  
33 98 Recent research shows that during the COVID-19 pandemic, sleep quality was impaired and the  
34 99 prevalence of poor sleep increased in both the working and general population [27-29].  
35 100 Furthermore, the global COVID-19 pandemic has compelled higher education institutions,  
36 101 including Ethiopian universities, to shift from face-to-face to online instruction, which has an  
37 102 impact on sleep quality [30-32]. Prolonged use of computers, coupled with the brightness of the  
38 103 light that they project onto the retina, are factors that are thought to trigger changes in sleep patterns  
39 104 [33]. The light emitted from computers is in close proximity to the retina [34]. This emitted optical  
40 105 radiation at short wavelengths is close to the peak sensitivity of melatonin suppression [33].  
41 106 Academic staff members used computers more frequently during the COVID-19 outbreak, which  
42 107 may have increased their exposure to computer light and led them to poor sleep quality, and  
43 108 negatively affected their quality of sleep [35]. Moreover, poor sleep quality has been correlated to  
44 109 old age, low economic status, substance use, obesity, use of an electronic device before bedtime,  
45 110 higher risks of contracting COVID-19 at work, workload, and job stress [36-44].

1  
2  
3 111 Given the widespread and harmful consequences of poor sleep quality, it needs to be a top priority  
4  
5 112 for public and occupational health. As previously stated, a thorough review of the literature  
6  
7 113 revealed that even less is known about the prevalence and factors of poor sleep quality among  
8  
9 114 academic staff and other university personnel in developing countries including Ethiopia [45].The  
10  
11 115 number of universities in Ethiopia is increasing, which is accompanied by an increase in academic  
12  
13 116 staff workforces. However, the lack of reliable and up-to-date data on mental health, especially on  
14  
15 117 sleep quality, makes it difficult for officials to plan for prevention and control measures. Therefore,  
16  
17 118 in the current study, we aimed to assess the prevalence and associated factors of poor sleep quality  
18  
19 119 among academic staff at the University of Gondar, Northwest Ethiopia.

## 19 120 **Methods and materials**

### 21 121 **Study design, Period, and Setting**

23 122 An institution-based cross-sectional study was conducted between March 17 to April 17, 2021.  
24  
25 123 The research was carried out at the University of Gondar, which is situated in the oldest and most  
26  
27 124 ancient city of Gondar , Northwestern Ethiopia, which is 737 kilometers far from Addis Ababa,  
28  
29 125 the capital city of Ethiopia [46]. The College of Medicine and Health Sciences, Comprehensive  
30  
31 126 Specialized Referral Hospital (CMHS), Maraki, Atse Tewdros, Atse Fasil, and Teda are the  
32  
33 127 university's five campuses [47]. On all campuses, there were 2,858 academic staff members  
34  
35 128 throughout the research period.

### 36 129 **Study participants**

38 130 The source population was the whole faculty members of the University of Gondar. The study  
39  
40 131 population, however, consisted of a random sample of academic personnel from each campus.  
41  
42 132 Academic personnel on critical illness, maternity leave, or sabbatical leave and individuals  
43  
44 133 diagnosed with sleep-related disorders were excluded, while academic staff with at least one year  
45  
46 134 of teaching experience and who were available throughout data collection were included.

### 47 135 **Sample size determination and sampling procedure**

49 136 The sample size was calculated by using a single population proportion formula [48] by  
50  
51 137 considering the following statistical assumptions:

53 138 Confidence level (Cl) of 95%

54 139 Proportion = 50% (no previous study in the study area)

1  
2  
3 140 Margin of error of 5%

4  
5 141 Using the following single proportion formula:

6  
7  
8 142  $n = (Z\alpha/2)^2 \frac{[p(1-p)]}{d^2}$  where:

9  
10  
11 143  $n$  = initial sample size,

12  
13 144  $Z = 1.96$ , the corresponding  $Z$ -score for the 95% CI

14  
15 145  $P$  = Proportion = 50%

16  
17 146  $d$  = Margin of error = 5% = 0.05

18  
19  
20 147  $n = (1.96)^2 \frac{[0.5(1-0.5)]}{0.05^2} = 384$

21  
22 148 The final sample size was 635 people, after taking into account a 10% non-response rate and a  
23 149 design effect of 1.5 because, in the absence of prior literature, a design effect of 1.5 to 2.0 is  
24 150 endorsed [49]. We employed a stratified sampling technique to select participants from the five  
25 151 campuses of the University of Gondar. A proportional allocation for each stratum defined how  
26 152 many sample points were needed. Thus, there were a total of 1027 academic staff members in the  
27 153 College of Medicine and Health Sciences ( $N_1=1027$ ), 630 academic staff members on Maraki  
28 154 campus ( $N_2=630$ ), 509 academic staff members on Tewdros campus ( $N_3=509$ ), 536 academic  
29 155 staff members on the Fasil campus ( $N_4=536$ ), and 156 academic staff members on the Teda  
30 156 campus ( $N_5=156$ ). Consequently, the numbers of participants from each campus were 228, 140,  
31 157 119, 113, and 35 from the College of Medicine and Health Sciences, Maraki, Fasil, Tewodros, and  
32 158 Teda campuses, respectively. The requisite sample sizes were then determined using a simple  
33 159 random sampling technique, and academic staff members from each stratum were randomly  
34 160 assigned using the OpenEpi random software version 3.

### 35 161 **Variable measurement and definition of terms**

36 162 **Poor sleep quality:** The Pittsburgh Sleep Quality Index (PSQI), a 19-item self-assessment of sleep  
37 163 quality, was used to measure academicians' poor sleep quality. The tool was free to use and  
38 164 designed to measure the outcome variable in the past month. It has a diagnostic sensitivity of  
39 165 89.6% and a specificity of 86.5% at greater than five cutoff values for identifying cases with sleep  
40 166 disorders [50]. PSQI consists of 7 component scores (ranging from 0 to 3), measuring subjective

1  
2  
3 167 sleep quality, sleep latency, sleep duration, sleep efficiency, sleep disturbances, use of sleeping  
4 168 medication, and daytime dysfunction. The 7 component scores are summed to give a global PSQI  
5 169 score ranging from 0 to 21. A global PSQI score of greater than 5 indicates poor sleep quality [33,  
6 170 51].

7  
8  
9  
10 171 **Body mass index (BMI):** weight in kilograms divided by the square of the height in meters ( $\text{kg}/\text{m}^2$ )  
11 172 categorized as underweight =  $\text{BMI} < 18.5$ , normal (health) =  $\text{BMI} 18.5\text{--}24.9$ , overweight =  $\text{BMI}$   
12 173  $25.0\text{--}29.9$ , and obese =  $\text{BMI} \geq 30.0$  [52].

13  
14  
15 174 **Alcohol drinker:** a scholar who drinks alcohol of any kind at least twice each week [53]

16  
17 175 **Cigarette smoker:** a scholar with a daily consumption of at least one stick of cigarettes [54].

18  
19 176 **Khat chewer:** a scholar who had chewed khat in the previous month [42].

20  
21 177 **Doing physical exercise:** doing any type of physical activity at least twice a week for at least 30  
22 178 minutes [55].

23  
24 179 **Electronic device use:** if the participant utilizes/ watches at least one of the following: television,  
25 180 computer, tablet, or mobile phone in bed before going to sleep [56].

26  
27 181 **Chronic illness:** illnesses such as asthma, diabetes mellitus, stroke, kidney stone, hypertension  
28 182 that can be managed, but cannot be cured and have a greater risk of developing a poor quality of  
29 183 sleep, [57].

30  
31 184 **Risk perception of COVID-19 infection:** was assessed by two psychological dimensions;  
32 185 perceived susceptibility and perceived severity. The first dimension was proxied by how likely  
33 186 one considered oneself (his/her family) would be infected with COVID-19 if no preventive  
34 187 measures will be taken. The second dimension was proxied by how one rated the seriousness of  
35 188 symptoms caused by COVID-19, their perceived chance of having COVID-19 cured and that of  
36 189 survival if infected with COVID-19. By combining the two dimensions, five items with five  
37 190 response options were asked to determine the respondents' levels of risk perception, with a higher  
38 191 total score indicating a high perceived risk of COVID-19 infection [58].

39  
40 192 **Job satisfaction:** the total score of at least 32 on the general job satisfaction scale [59].

41  
42 193 **Perceived job stress:** a score of at least 21 on the workplace-stress scale [60].

43  
44 194 **Data Collection Tools and Procedures**

1  
2  
3 195 Data were collected through a validated self-administered standardized structured questionnaire.  
4  
5 196 The questionnaire was adapted after an extensive review of related literature and similar study  
6  
7 197 tools [12, 42, 57, 61-63]. The questionnaire embraces three sections containing different items.  
8  
9 198 The first section, socio-demographic characteristics, assesses information on age, sex, religion,  
10  
11 199 educational status, working experience, and monthly salary. The second element of the  
12  
13 200 questionnaire hugs information on poor sleep quality, which was assessed by using the PSQI,  
14  
15 201 which is a measure of sleep disturbance for the period of 1-month immediately preceding the time  
16  
17 202 of administration. PSQI is an effective and the most widely used instrument in diagnosis of sleep  
18  
19 203 disorders in different populations [9, 64]. The tool is easy to understand, patient compliant and  
20  
21 204 requires about 5 min to be completed. 10]. The PSQI contains 19 items and 7 clinically important  
22  
23 205 components in relation to sleep difficulties: subjective sleep quality, sleep latency, sleep duration,  
24  
25 206 sleep efficiency, sleep disturbance, use of sleep medication, and daytime dysfunction. The total  
26  
27 207 PSQI score was calculated by summing up the seven component scores as cited in [50]. Scoring  
28  
29 208 of the answers is based on a 0 to 3 scale, whereby 3 reflects the negative extreme on the Likert  
30  
31 209 scale, as well a global score of between 0 and 21. Individuals scoring a global score of greater than  
32  
33 210 5 were deemed poor sleep quality [65]. The PSQI has been validated in many languages with  
34  
35 211 acceptable psychometric properties [66] and is frequently used in clinical and research settings  
36  
37 212 [67]. The PSQ has also been validated as reliable for use in Ethiopian community [51]. The PSQI's  
38  
39 213 validity was supported by a comprehensive test used to diagnose sleep disorders like  
40  
41 214 polysomnographic findings [68, 69]. The PSQI has a sensitivity of 89.6% and specificity of 86.5%  
42  
43 215 for identifying cases with sleep disorder, using a cut-off score of 5 [50]. The last part of the  
44  
45 216 questionnaire includes information used to assess behavioral factors and psychosocial factors like  
46  
47 217 cigarette smoking (yes/no), BMI (kg/m<sup>2</sup>), physical activity (yes/no), alcohol consumption  
48  
49 218 (yes/no), use of an electronic device before bedtime (yes/no), history of chronic illness (yes/no),  
50  
51 219 risk perception of COVID-19, job satisfaction, job stress, and workload.

52  
53 220 Risk perception regarding COVID-19 in this study was measured by using two psychological  
54  
55 221 dimensions; perceived susceptibility and perceived severity. The first dimension (perceived  
56  
57 222 susceptibility) contains two questions; including how likely they will be infected with COVID-19  
58  
59 223 and how likely one considered oneself (his/her family) would be infected with COVID-19 if no  
60  
224 preventive measures will be taken. Responses of the two questions were rated on a 5-point Likert  
225 scale (ranging from 1 = very likely to 5 = very unlikely). The second dimension (perceived

1  
2  
3 226 severity) contains three questions; including how one rated the seriousness of symptoms caused  
4  
5 227 by COVID-19, their perceived chance of having COVID-19 cured, and that of survival if infected  
6  
7 228 with COVID-19. Responses of the three questions were rated on a 5-point Likert scale (ranging  
8  
9 229 from 1 = Very serious /Very low to 5 = Not serious at all/Very high). By combining the two  
10  
11 230 dimensions, making five questions each answered on a Likert scale of 1 to 5 giving rise to a total  
12  
13 231 score ranging from 5 to 25. The higher the score, the higher the risk perception of COVID-19  
14  
15 232 infection [70]. We used the 10-item generic job satisfaction scale questionnaire to measure  
16  
17 233 academicians' job satisfaction [59]. The scale comprised ten questions ranging from 1 to 5 each  
18  
19 234 item and ranged from very dissatisfied, dissatisfied, neutral, satisfied and very satisfied, according  
20  
21 235 to their occurrence respectively, in 1 month before the survey. The scale had 10 items with a rating  
22  
23 236 of 1 to 5, and the responses ranged from very dissatisfied, dissatisfied, neutral, satisfied and very  
24  
25 237 satisfied, depending on how frequently they occurred in the month before to the survey and then  
26  
27 238 summing up all 10 items. The scale produced a single ranking, with high scores indicated higher  
28  
29 239 job satisfaction vice versa. Perceived job-related stress of the participants was collected using the  
30  
31 240 8-item workplace stress scale questionnaire [60]. The scale comprised eight questions ranging  
32  
33 241 from 1 to 5 each item and ranged from never, rarely, sometimes, often and very often, according  
34  
35 242 to their occurrence respectively, in 1 month before the survey. The 8- item workplace stress scores  
36  
37 243 are obtained by reversing scores on three positive items, e.g. 5 = 1, 4 = 2, 3 = 3, etc., and then  
38  
39 244 summing up all 8 items. Items 6, 7 and 8 are positive items. The scale produced a single ranking,  
40  
41 245 with high scores indicated higher stress levels and vice versa. The instruments used in the current  
42  
43 246 study have been employed in previous studies conducted in the country's context [71-74].

#### 40 247 **Data quality control**

41  
42 248 To maintain uniformity, the questionnaire was initially created in English, translated into the local  
43  
44 249 tongue of Amharic, and then translated back to English. Following appropriate training and  
45  
46 250 orientation, three BSc nurses and MPH Environmental health specialist who were employed at the  
47  
48 251 comprehensive specialized hospital of the University of Gondar participated in data collection.  
49  
50 252 The data collectors and supervisor took the orientation on issues relating to the clarity of the  
51  
52 253 questions, objectives of the study, confidentiality of information, the voluntary involvement  
53  
54 254 (consent) participants in the study, and on time of data collection as study participants' regular  
55  
56 255 duties should not be compromised. Both data collectors and supervisors were under the lead  
57  
58 256 investigator's supervision. The pre-test was carried out at Teda Health Sciences College in Gondar

1  
2  
3 257 city on 5% (31) of the sample size to ensure the validity and reliability of the questionnaire, yet  
4  
5 258 the College was not included in the final survey. Based on the results of the pretest analysis, various  
6  
7 259 modifications were made including the clarification of a few ambiguities and misinterpretations,  
8  
9 260 and an estimation of how long the data gathering process would take. Feedback was provided by  
10  
11 261 discussing any issue that arose during data collection with the primary investigator, the supervisor,  
12  
13 262 and the data collectors.

### 14 263 **Data processing and analysis**

15  
16 264 Data were entered into Epi-data version 4.6 after being verified as complete and exported to  
17  
18 265 STATA version 14 for additional analysis. We used descriptive statistics, narration, tabulation,  
19  
20 266 and graphics to present the findings. Prior to doing bivariable and multivariable binary logistic  
21  
22 267 regression analyses, the variables' normality, outliers, and multicollinearity were examined. A  
23  
24 268 variance inflation factor (VIF) was used to test the multicollinearity assumption, and all variables  
25  
26 269 displayed values of less than 5. As a result, multicollinearity was not observed to exist. Also, the  
27  
28 270 reliability of the questionnaire was tested using Cronbach's Alpha and found a reliable Cronbach's  
29  
30 271 Alpha = 0.79, and therefore the questionnaire was tolerable for its consistency in repeating what  
31  
32 272 had previously been measured using the tool [51]. Additionally, Cronbach's Alpha was used to  
33  
34 273 examine the questionnaire's reliability, and the reliability Cronbach's Alpha value was 0.79. As a  
35  
36 274 result, the questionnaire was deemed satisfactory for its consistency in reproducing what had  
37  
38 275 previously been measured using the instrument. A binary logistic regression was used to compute  
39  
40 276 the relationship between the variables. To control the effects of potential confounders, variables  
41  
42 277 with p-values of 0.2 in the bivariable logistic regression analysis were exported to a multivariable  
43  
44 278 logistic regression. Last but not least, in the multivariable binary logistic regression model,  
45  
46 279 statistically significant variables were established at a p-value of 0.05, and an adjusted odds ratio  
47  
48 280 (AOR) with a confidence interval of 95% was provided to quantify the strength of the association.  
49  
50 281 The Hosmer-Lemeshow test was used to determine the final model's goodness of fit, and the results  
51  
52 282 revealed a good fit ( $p=0.65$ ) [75].

### 53 283 **Patient and public involvement statement**

54  
55 284 University lecturers were participated in this investigation by contributing useful information.  
56  
57 285 However, they have never been involved in the study design, protocol, data collection tools, and  
58  
59 286 reporting and disseminating the findings.

287 **Results**288 **Socio-demographic characteristics of study participants**

289 A total of 635 questionnaires were distributed, giving a response rate of 95.59% (N = 607). The  
 290 age of the participants ranged from 21 to 70, with a mean ( $\pm$ SD) of 32.39 ( $\pm$ 6.80) years old.  
 291 Moreover, more than two-thirds of the participants were male (71.83%), and the majority of them,  
 292 362 (59.64%), indicated that they were married. Regarding educational status, 416(68.53%) of the  
 293 participants had master's degree. The participants' median estimated (interquartile range (IQR))  
 294 monthly income was 11305 (10700-13600) Ethiopian Birr (ETB) (**Table 1**).

295 **Table 1:** Socio-demographic characteristics of academic staff in University of Gondar, Ethiopia,  
 296 2021 (N=607).

| Variables                       | Frequency (n) | Percent (%) |
|---------------------------------|---------------|-------------|
| <b>Sex</b>                      |               |             |
| Male                            | 436           | 71.83       |
| Female                          | 171           | 28.17       |
| <b>Age (years)</b>              |               |             |
| 21-29                           | 226           | 37.23       |
| 30-39                           | 301           | 49.59       |
| $\geq$ 40                       | 80            | 13.18       |
| <b>Religion</b>                 |               |             |
| Orthodox                        | 486           | 80.07       |
| Muslim                          | 69            | 11.37       |
| Protestant                      | 52            | 8.57        |
| <b>Marital status</b>           |               |             |
| Single                          | 245           | 40.36       |
| Married                         | 362           | 59.64       |
| <b>Educational status</b>       |               |             |
| Bachelor                        | 94            | 15.49       |
| Master                          | 416           | 68.53       |
| Ph.D.                           | 97            | 15.98       |
| <b>Work experience in years</b> |               |             |



|                             |     |       |
|-----------------------------|-----|-------|
| ≤5                          | 167 | 27.51 |
| 6-10                        | 249 | 41.02 |
| >10                         | 191 | 31.47 |
| <b>Monthly salary (ETB)</b> |     |       |
| <10 000                     | 99  | 16.31 |
| 10 000-13 000               | 331 | 54.53 |
| >13 000                     | 177 | 29.16 |

297 **Key:** ETB= Ethiopian Birr (currency)

### 298 Behavioral and psychosocial characteristics of study participants

299 Four hundred fourteen (68.20%) of the participants were working between 6 and 10 hours per day,  
 300 and 79 (13.11%) participants were working more than 10 hours per day. Of the study participants,  
 301 the number of respondents who admitted to smoking cigarettes was 108 (17.79%). While 112  
 302 (18.45) said they had alcohol drinking habits, over one-third (33.28%) of respondents were  
 303 performing physical exercise at least twice a week. The majority of the respondents, 434 (71.5%),  
 304 had a normal (18.5-24.9 kg/m<sup>2</sup>) BMI, while 48 (7.91%) of them were underweight (>18.5 kg/m<sup>2</sup>)  
 305 BMI. Out of the study participants, 188 (30.97%) of them clarified that they had a chronic illness,  
 306 and almost half (51.24%) of the study participants have used an electronic device before bedtime.  
 307 Regarding psychosocial characteristics, nearly one-fourth (24.38%) of the respondents had high-  
 308 risk perceptions of the COVID-19 virus. Moreover, 516 (85.01%) respondents supposed they were  
 309 satisfied with their jobs. Furthermore, when asked whether they felt stressed out by their work,  
 310 276 respondents (45.47 %) said they did (**Table 2**).

311 **Table 2:** Behavioral and psychosocial characteristics of academic staff in the University of  
 312 Gondar, Ethiopia, 2021 (N=607).

| Variables                    | Frequency (n) | Percent (%) |
|------------------------------|---------------|-------------|
| <b>Working hours per day</b> |               |             |
| ≤5hr                         | 114           | 18.78       |
| 6-10hr                       | 414           | 68.20       |
| >10hr                        | 79            | 13.01       |
| <b>Cigarette smoker</b>      |               |             |
| Yes                          | 108           | 17.79       |
| No                           | 499           | 82.21       |

**Alcohol consumption habit**

|     |     |       |
|-----|-----|-------|
| Yes | 112 | 18.45 |
| No  | 495 | 81.55 |

**Khat chewing behavior**

|     |     |       |
|-----|-----|-------|
| Yes | 19  | 3.13  |
| No  | 588 | 96.87 |

**Physical exercise**

|     |     |       |
|-----|-----|-------|
| Yes | 202 | 33.28 |
| No  | 405 | 66.72 |

**Body mass index (BMI)**

|                      |     |       |
|----------------------|-----|-------|
| Underweight          | 48  | 7.91  |
| Normal               | 434 | 71.50 |
| Overweight and obese | 125 | 20.59 |

**Chronic Illness**

|     |     |       |
|-----|-----|-------|
| Yes | 188 | 30.97 |
| No  | 419 | 69.03 |

**The habit of taking breaks**

|     |     |       |
|-----|-----|-------|
| Yes | 329 | 54.20 |
| No  | 278 | 45.80 |

**Electronic device use**

|     |     |       |
|-----|-----|-------|
| Yes | 311 | 51.24 |
| No  | 296 | 48.76 |

**Duration of electronic device use**

|           |     |       |
|-----------|-----|-------|
| ≤3hrs/day | 127 | 40.84 |
| >hrs/day  | 184 | 59.16 |

**Risk perception towards COVID-19 virus**

|      |     |       |
|------|-----|-------|
| High | 148 | 24.38 |
| Low  | 459 | 75.62 |

**Colleagues relationship**

|      |     |       |
|------|-----|-------|
| Good | 539 | 88.80 |
| Poor | 68  | 11.20 |

**Job satisfaction**

|               |     |       |
|---------------|-----|-------|
| Satisfied     | 516 | 85.01 |
| Not satisfied | 91  | 14.99 |

**Perceived job stress**

|              |     |       |
|--------------|-----|-------|
| Stressed     | 276 | 45.47 |
| Not stressed | 331 | 54.53 |

**Workload**

|     |     |       |
|-----|-----|-------|
| Yes | 506 | 83.36 |
| No  | 101 | 16.64 |

313

**314 Prevalence of poor sleep quality and its components scores**

315 The mean global score of PSQI (computed using the component scores) was 6.80, 95% CI (6.55,  
 316 7.04). The result of this study revealed that 60.30% (95% CI, 56.28%-64.21%) of academicians  
 317 were classified as having poor sleep quality. Seven components of sleep quality in the present  
 318 study were assessed and the components identified their sleep status. Accordingly, 514 (84.68%)  
 319 of the academicians had fairly good to very good sleep perception. From the total study  
 320 participants, 342 (56.34%) had mild difficulty in falling asleep (PSQI latency). Regarding sleeping  
 321 duration, only 165 (27.18%) of the respondents had more than 7 hours of sleep per night, and 326  
 322 (53.71%) had a very high habitual sleep efficiency (>85%). Moreover, most (66.39%) of  
 323 academicians reported that they had mild difficulty in the PSQI disturbance domain and only 39  
 324 (6.42%) of them used sleep medication to sleep during the past month. Furthermore, 196 (32.29%)  
 325 of them had mild to severe difficulty in PSQI day dysfunction due to sleepiness in the past month  
 326 (Table 3).

327 **Table 3:** Poor sleep quality and its components scores of academic staff in the University of  
 328 Gondar, Ethiopia, 2021 (N=607).

| Variables                             | Frequency (n) | Percent (%) |
|---------------------------------------|---------------|-------------|
| <b>Sleep perception</b>               |               |             |
| Very good                             | 265           | 43.66       |
| Fairly good                           | 249           | 41.02       |
| Fairly bad                            | 80            | 13.18       |
| Very bad                              | 13            | 2.14        |
| <b>Sleep latency (falling asleep)</b> |               |             |
| 0 to 15minutes (0)                    | 27            | 4.45        |
| 16 to 30 minutes (1)                  | 342           | 56.34       |

|                                          |     |       |
|------------------------------------------|-----|-------|
| 31 to 60 minutes (2)                     | 161 | 26.52 |
| >60 minutes (3)                          | 77  | 12.69 |
| <b>Sleep duration</b>                    |     |       |
| >7hrs (0)                                | 165 | 27.18 |
| 6h to 7hrs (1)                           | 148 | 24.38 |
| < 6hrs (2 & 3)                           | 294 | 48.43 |
| <b>Sleep efficiency</b>                  |     |       |
| >85% (0)                                 | 326 | 53.71 |
| 75% to 84% (1)                           | 143 | 23.56 |
| 65% to 74% (2)                           | 60  | 9.88  |
| <65% (3)                                 | 78  | 12.85 |
| <b>Sleep disturbance</b>                 |     |       |
| Never (0)                                | 116 | 19.11 |
| 1 time a week (1)                        | 403 | 66.39 |
| 1–2 times a week (2)                     | 84  | 13.84 |
| ≥3 times a week (3)                      | 4   | 0.66  |
| <b>Used sleep medication</b>             |     |       |
| Never (0)                                | 568 | 93.57 |
| 1 time a week (1)                        | 27  | 4.45  |
| 1–2 times a week (2)                     | 7   | 1.15  |
| ≥3 times a week (3)                      | 5   | 0.82  |
| <b>Daytime dysfunction</b>               |     |       |
| No problem (0)                           | 411 | 67.71 |
| 1 time a week (1)                        | 143 | 23.56 |
| 1–2 times a week (2)                     | 44  | 7.25  |
| ≥3 times a week (3)                      | 9   | 1.48  |
| <b>Total score of poor sleep quality</b> |     |       |
| ≤ 5 (Good sleep quality)                 | 241 | 39.70 |
| > 5 (Poor sleep quality)                 | 366 | 60.30 |

329 **Key:** 0= No difficulty, 1=Mild difficulty, 2=Moderate difficulty, 3=Sever difficulty

### 330 **Factors associated with poor sleep quality**

331 In the bivariable binary logistic regression analysis, sex (p-value of 0.124), educational status (p-  
332 value of 0.179), working hours per day (p-value of 0.003), khat chewing (p-value of 0.042), not

333 perform physical activities (p-value of 0.122), electronic device use (p-value of 0.004), chronic  
 334 illness (p-value of 0.002), risk perception towards COVID-19 virus (p-value of 0.005), job  
 335 dissatisfaction (p-value of 0.112), and perceived job stress (p-value of  $\leq 0.001$ ) were the factors  
 336 associated with poor sleep quality. However, after controlling for confounding variables in the  
 337 multivariable binary logistic regression analysis, only working hours per day, electronic device  
 338 use before bedtime, risk perception towards COVID-19 infection, and perceived job stress  
 339 remained to have a significant association with poor sleep quality.

340 The probability of developing poor sleep quality was 2.19 times greater in employees who worked  
 341 more than 10 hours per day compared to those who worked for 5 hours or less per day [AOR=  
 342 2.19, 95% CI (1.16, 4.27)] at a p-value of 0.019. Similarly, participants who use electronic devices  
 343 before bedtime were 1.53 times more likely to experience poor sleep quality compared to who  
 344 didn't use electronic devices before bedtime counterparts [AOR=1.53, 95% CI (1.04, 2.27)] at a  
 345 p-value of 0.031. Moreover, the odds of having poor sleep quality were 1.60 times more likely  
 346 among workers who had a high-risk perception of COVID-19 infection than among those who had  
 347 a low-risk perception about it [AOR = 1.60, 95% CI (1.04, 2.46)] at a p-value of 0.032. Finally, the  
 348 chances of suffering from poor sleep quality among academicians who had perceived job stress  
 349 were 2.15 times higher as compared to those who had no job stress [AOR = 2.15 (95% CI, (1.50,  
 350 3.08)] at a p-value of  $\leq 0.01$  as shown in **Table 4**.

351 **Table 4:** Bivariable and multivariable logistic regression analysis of factors associated with poor  
 352 sleep quality among academic staff, University of Gondar, Ethiopia, 2021 (N=607).

| Variables                    | Poor sleep quality |     | COR with 95% CI  | AOR with 95% CI  | P-value |
|------------------------------|--------------------|-----|------------------|------------------|---------|
|                              | Yes                | No  |                  |                  |         |
| <b>Sex</b>                   |                    |     |                  |                  |         |
| Male                         | 256                | 180 | 1                | 1                |         |
| Female                       | 110                | 61  | 1.27 (0.88-1.83) | 1.42 (.94-2.13)  | 0.091   |
| <b>Educational status</b>    |                    |     |                  |                  |         |
| Bachelor                     | 62                 | 32  | 1                | 1                |         |
| Master                       | 243                | 173 | 0.72 (0.45-1.16) | 0.74 (0.44-1.23) | 0.245   |
| Ph.D.                        | 61                 | 36  | 0.87 (0.48-1.58) | 0.87 (0.46-1.65) | 0.674   |
| <b>Working hours per day</b> |                    |     |                  |                  |         |
| $\leq 5$ hr                  | 59                 | 55  | 1                | 1                |         |

|                                          |     |     |                   |                          |              |
|------------------------------------------|-----|-----|-------------------|--------------------------|--------------|
| 6-10hr                                   | 249 | 165 | 1.41 (0.93- 2.13) | 1.10 (0.76-1.85)         | 0.679        |
| >10hr                                    | 58  | 21  | 2.57 (1.39-4.78)  | <b>2.19 (1.16-4.27)*</b> | <b>0.019</b> |
| <b>Khat chewing</b>                      |     |     |                   |                          |              |
| Yes                                      | 16  | 3   | 3.63 (1.05-12.58) | 3.00 (0.82-11.00)        | 0.097        |
| No                                       | 350 | 238 | 1                 | 1                        |              |
| <b>Physical exercise</b>                 |     |     |                   |                          |              |
| Yes                                      | 113 | 89  | 1                 | 1                        |              |
| No                                       | 253 | 152 | 1.31 (0.93-1.85)  | 1.40 (0.97-2.03)         | 0.068        |
| <b>Electronic device use</b>             |     |     |                   |                          |              |
| Yes                                      | 205 | 106 | 1.62 (1.17-2.25)  | <b>1.53 (1.04-2.27)*</b> | <b>0.031</b> |
| No                                       | 161 | 135 | 1                 | 1                        |              |
| <b>Chronic Illness</b>                   |     |     |                   |                          |              |
| Yes                                      | 131 | 57  | 1.80 (1.25-2.59)  | 1.45 (0.98-1.99)         | 0.059        |
| No                                       | 235 | 184 | 1                 | 1                        |              |
| <b>Risk perception of COVID-19 virus</b> |     |     |                   |                          |              |
| High                                     | 104 | 44  | 1.77 (1.19-2.65)  | <b>1.60 (1.04-2.46)*</b> | <b>0.032</b> |
| Low                                      | 262 | 197 | 1                 | 1                        |              |
| <b>Job satisfaction</b>                  |     |     |                   |                          |              |
| Satisfied                                | 318 | 198 | 1                 | 1                        |              |
| Not satisfied                            | 48  | 43  | 0.70 (0.44-1.09)  | 0.67 (0.42-1.08)         | 0.099        |
| <b>Perceived job stress</b>              |     |     |                   |                          |              |
| Stressed                                 | 197 | 79  | 2.39 (1.70-3.35)  | <b>2.15(1.50-3.08)*</b>  | <b>≤0.01</b> |
| Not stressed                             | 169 | 162 | 1                 | 1                        |              |

**Keys:** 1=reference category, AOR=adjusted odds ratio, CI= confidence interval, COR=crudes odds ratio, COVID-19= Corona virus disease 19, \*= significant at  $p < 0.05$  in multivariable logistic regression analysis, Hosmer and Lemeshow test  $p = 0.650$ .

## Discussion

Poor sleep quality incurs substantial health, economic and societal costs. Understanding the magnitude and various factors linked to the ailment would help researchers identify viable therapies to improve sleep quality in vulnerable populations. The higher education work environment is characterized by a highly competitive work nature. The University teaching staff in addition to their normal teaching activities, handled various tasks including conducting and preparing research for publication, providing community services, and managing administrative

1  
2  
3 363 positions. Furthermore, their regular teaching activities have shifted from face-to-face to online  
4  
5 364 instruction during the COVID-19 pandemic, which has an impact on their sleep quality.  
6  
7 365 Understanding the magnitude and investigating etiologies of the condition plays a paramount role  
8  
9 366 to establish effective prevention and control strategies. To our knowledge, the current study is the  
10  
11 367 first to assess the prevalence and risk factors of poor sleep quality among university academic staff  
12  
13 368 in Ethiopia. The prevalence of poor sleep quality in the last one month was found to be 60.30%  
14  
15 369 with 95% CI (56.28-64.21). Working for more than 10 hours per day, electronic device use before  
16  
17 370 bedtime, high-risk perception of COVID-19 infection, and having job stress were factors positively  
18  
19 371 associated with poor sleep quality in the current study.

20  
21 372 Results of two investigations conducted in Brazil (57.9%) [76] and (61.3%) [12] supported the  
22  
23 373 current data. This agreement could be due to the nature of tasks in the academic environments  
24  
25 374 including roles related to teaching and research activities, which usually resemble in every higher  
26  
27 375 academic institution. Participants in those nations might also be obliged to work in a substandard  
28  
29 376 workplace in an unhealthy manner for prolonged periods, and fewer individuals are aware of sleep  
30  
31 377 health and the effect of poor sleep quality. The other possible explanation might be due to study  
32  
33 378 participants having a similar age group as compared to participants in those countries.

34  
35 379 On the contrary, the current study had a higher magnitude of the risk of poor sleep quality  
36  
37 380 compared to the studies conducted in Turkey (38.9%) [13] and Malaysia (45%) [77]. This  
38  
39 381 difference might be due to the unstable socioeconomic status of the respondents in this study. The  
40  
41 382 respondents in this study might attempt to compensate for their low salaries by teaching different  
42  
43 383 shifts at multiple colleges and schools. This may lead to longer working hours because they start  
44  
45 384 their daily work activities much earlier in the day and conclude their working day much later. The  
46  
47 385 difference might be also due to the sample size variation; the previous studies were conducted  
48  
49 386 among a small number of study participants compared to the number of participants in this study.  
50  
51 387 The other possible justifications for the difference might be the variation in the educational system,  
52  
53 388 study setting, workload, and cultural differences between Ethiopia and those countries.

54  
55 389 There were no study reports with a larger magnitude than the current finding. A possible reason  
56  
57 390 for the increased magnitude of sleep problems in the current study could be due to the study period;  
58  
59 391 we conducted the study during the early phase of the COVID-19 pandemic. Higher education  
60  
392 institutions needed to look for alternate educational strategies to be adopted during the COVID-19

1  
2  
3 393 pandemic and the e-learning strategy emerged as an alternative solution to continue education. The  
4  
5 394 educational institutions started using different educational platforms like Google classroom,  
6  
7 395 Zoom, and Microsoft teams. Lecturers were subjected to excessive use of digital devices without  
8  
9 396 breaks as they were shifted to online teaching. There has also been an increased digitalization for  
10  
11 397 recreational purposes. Hence, it was noted as exposure to light emitted from digital devices has  
12  
13 398 been interfering with the circadian regulation/melatonin rhythm [33, 78], which may lead to poor  
14  
15 399 sleep quality.

16 400 In this study, long working hour per day (>10hrs/day) was significantly associated with poor sleep  
17  
18 401 quality. The finding echoes the result of previous investigations [9, 79]. A possible justification  
19  
20 402 for this report may be that employees with long working hours need more time to recover from  
21  
22 403 work-induced fatigue [80]. However, long working hours reduce the amount of private time  
23  
24 404 available to them, which may lead to sleep deprivation [81]. For recovery from fatigue, not only  
25  
26 405 sleep but also relaxation, for example, spending time with family and friends, resting, or reading  
27  
28 406 is needed, but long working hours may also reduce relaxation time [82]. Therefore, reduced private  
29  
30 407 time for workers due to long working hours may lead to sleeplessness, and cause sleep disorders.  
31  
32 408 In addition, due to the nature of their occupation, our study participants spend a lot of time working  
33  
34 409 with computers and other electronic devices. Plausible investigations also confirmed that the  
35  
36 410 utilization of electronic devices for a long period of time is associated with sleep disorders [33,  
37  
38 411 34].

39 412 Electronic device use before bedtime showed a significant association with poor sleep quality.  
40  
41 413 Similar results were reported in other studies [83-85]. This could be reasoned as sleep quantity and  
42  
43 414 quality are significantly reduced when people use digital devices for an extended period [86]. For  
44  
45 415 example, cell phones, tablets, readers, computers, and laptops emit short-wavelength enriched  
46  
47 416 light, which has been found to suppress or delay the normal generation of melatonin in the evening  
48  
49 417 and minimize feelings of sleepiness [87]. Moreover, workforces in a higher education context are  
50  
51 418 often confronted with demanding responsibilities requiring work overload, long working hours,  
52  
53 419 and stress, in addition to the COVID-19 pandemic difficulties in the world of education. Because  
54  
55 420 of the pandemic, universities were forced to conduct all of their activities online, including in the  
56  
57 421 current study setting, which increased the usage of electronic devices, contributing to or  
58  
59 422 exacerbating poor sleep quality [88].



1  
2  
3 423 Our current study revealed a high-risk perception of COVID-19 infections was found to be a  
4 424 determinant factor of poor sleep quality. This finding is in concordance with other research reports  
5 425 [44, 89]. This could be explained as those people who thought they were at a higher risk of  
6 426 developing COVID-19 had more fear than those who thought they were at a lower risk. Fear and  
7 427 rumination were also found to be adversely related to sleep quality, indicating that fear of infection  
8 428 and rumination did lead to poor sleep quality during the pandemic, which contribute to poorer  
9 429 sleep quality both directly and indirectly by increasing fear [44]. Several researchers had examined  
10 430 the influence of the COVID-19 pandemic on mental health, concluding that persons who are  
11 431 fearful of becoming infected are more likely to develop sleeping disturbances [90].

12 432 Participants who reported having job stress were 2.38 times more likely to have poor sleep quality  
13 433 than those who did not have stress. The result is in agreement with results of the studies conducted  
14 434 in Brazil [76], Malaysia [9, 91], and Indonesia [92]. The plausible reason might be due to the  
15 435 linkages between sleep, stress regulation, and alteration in the hypothalamic-pituitary-adrenal axis  
16 436 implication of psychopathology and sleep-wake cycle. Job stress can lead to the release of an  
17 437 excessive level of glucocorticoids hormones like cortisol. A higher level of cortisol during stressful  
18 438 life events primes to sleep rhythm disruption that results in sleep deprivation [93, 94].

19 439 This study is the first of its kind to examine the magnitude and factors influencing poor sleep  
20 440 quality among academic staff in Ethiopia, who are more likely to suffer from sleep disturbances,  
21 441 particularly during the COVID-19 pandemic. Nevertheless, there are few studies published in the  
22 442 scientific literature that address the prevalence and risk factors of sleep quality problems in higher  
23 443 education employees. This study would likely contribute significant evidence to literature  
24 444 regarding prevalence and the factors influencing occurrences of sleep problems. As part of this  
25 445 study, the following limitations should be considered while interpretation. First, the study was  
26 446 based on a cross-sectional study design which hinders the temporal relationship between the  
27 447 outcome of interest (poor sleep quality) and factors influencing its occurrences. Second, the study  
28 448 was based on participant's self-reported data. As a result, underestimation of the condition due to  
29 449 recall bias may be expected. Moreover, participants' responses may also be susceptible to social  
30 450 desirability bias, which leads them to give answers that are socially acceptable. To decrease social  
31 451 desirability, however, precautions were taken by making sure that only study participants were  
32 452 present during data collection and that data confidentiality was upheld. Finally, the finding was  
33 453 not supported by clinical diagnoses, like actigraphy and polysomnography testing that help to

1  
2  
3 454 identify sleep disorders objectively. However, we made use of the validated Pittsburgh Sleep  
4  
5 455 Quality Index (PSQI) questionnaire, which is a standardized instrument used to measure the  
6  
7 456 quality and patterns of sleep in adults.

## 8 9 457 **Conclusion**

10  
11 458 This study revealed that two-thirds of the participants had poor sleep quality during the COVID-  
12  
13 459 19 pandemic, indicating a considerable prevalence of the condition. The finding highlights the  
14  
15 460 importance of optimizing the working hours per day, minimizing electronic device use before  
16  
17 461 bedtime, promoting risk perception toward COVID-19 infection, and developing workplace  
18  
19 462 coping strategies for stress, which play a substantial role in minimizing poor sleep quality. We  
20  
21 463 recommend future studies to account for different sectors such as telecommunication, healthcare,  
22  
23 464 transportation, etc. with an interventional study design and objectively measure sleep quality  
24  
25 465 parameters.

## 26 466 **Data availability statement**

27  
28 467 All the data generated in this study are included in this manuscript. The data sets used and analyzed  
29  
30 468 to produce the current manuscript can be obtained from the corresponding author upon request via  
31  
32 469 e-mail address of [amensisahailu@gmail.com](mailto:amensisahailu@gmail.com).

## 33 34 470 **Ethics statements**

### 35 36 471 **Patient consent for publication**

37  
38 472 Consent obtained directly from patient (s).

### 39 40 473 **Ethics approval and consent to participate**

41  
42 474 Ethical approval was secured from the Institutional Ethical Review Board (IRB) of the University  
43  
44 475 of Gondar, College of Medicine and Health Sciences, Institute of Public Health (**Reference #:**  
45  
46 476 **IPH/1425/2021**). The study followed the tenets of the Declaration of Helsinki and also complied  
47  
48 477 with the ethical requirements set by the University of Gondar. Written informed consent was  
49  
50 478 obtained from each respondent before commencing data collection after an explanation of the  
51  
52 479 nature and possible consequences of the study. The information sheet that clearly shows the  
53  
54 480 research topic, the objectives of the study, confidentiality of the participant's responses, the study  
55  
56 481 benefits, and associated risks was prepared and presented. We removed any personal identifiers to  
57  
58 482 assure confidentiality of the participants and only anonymous data were used for interpretations.

1  
2  
3 483 Furthermore, since the data were collected during the COVID-19 pandemic, we implemented  
4 484 infection prevention protocols including social distancing and wearing of facemasks.

### 485 **Abbreviations**

9 486 AOR=Adjusted Odds Ratio; CI= Confidence Interval; COVID-19= Corona virus disease 19;  
10 487 COR= Crude Odds Ratio; ETB= Ethiopia Birr; OR= Odds Ratio; PSQI= Pittsburgh Sleep Quality  
11 488 Index, SD= Standard Deviation; SQ= Sleep Quality; STATA= Statistical software for data science

### 15 489 **Conflicting interests**

16  
17  
18 490 None declared.

### 20 491 **Funding**

21  
22  
23 492 The authors of this study didn't receive funds from any funding organization. The cost of data  
24 493 collection tools and data collectors' fee was covered by the principal investigator, i.e., AHT.

### 26 494 **Author's contribution**

27  
28  
29 495 **AHT:** Initiated the research concept, wrote up the research proposal, analyzed the data, presented  
30 496 the results and discussions, wrote up of the draft manuscript, reviewed and finalized the manuscript  
31 497 document, and is the corresponding author. **MA:** Involved in presentation and interpretation  
32 498 process of results and discussions, and reviewed the final drafted manuscript document. **GA:**  
33 499 Involved in presentation and interpretation process of results and discussions, and reviewed the  
34 500 final drafted manuscript document. **GGK:** Involved in presentation and interpretation process of  
35 501 results and discussions, and reviewed the drafted manuscript document. All the authors read and  
36 502 approved the final manuscript.

### 42 503 **Acknowledgments**

43  
44  
45 504 The authors very much thankful to all data collectors, supervisor, and study participants for their  
46 505 coordination in the study.

### 48 506 **References**

- 49  
50  
51 507 1. Landry GJ, Best JR, Liu-Ambrose T: **Measuring sleep quality in older adults: a comparison**  
52 508 **using subjective and objective methods.** *Frontiers in aging neuroscience* 2015, 7:166.  
53 509 2. Yang Y, Li W, Ma T-J, Zhang L, Hall BJ, Ungvari GS, Xiang Y-T: **Prevalence of poor sleep**  
54 510 **quality in perinatal and postnatal women: a comprehensive meta-analysis of observational**  
55 511 **studies.** *Frontiers in psychiatry* 2020, 11:161.

- 1  
2  
3 512 3. Madrid-Valero JJ, Martínez-Selva JM, Couto BRd, Sánchez-Romera JF, Ordoñana JR: **Age and**  
4 513 **gender effects on the prevalence of poor sleep quality in the adult population.** *Gaceta sanitaria*  
5 514 2017, **31**:18-22.
- 6 515 4. Sateia MJ: **International classification of sleep disorders.** *Chest* 2014, **146**(5):1387-1394.
- 7 516 5. Buysse DJ, Angst J, Gamma A, Ajdacic V, Eich D, Rössler W: **Prevalence, course, and**  
8 517 **comorbidity of insomnia and depression in young adults.** *Sleep* 2008, **31**(4):473-480.
- 9 518 6. Paunio T, Korhonen T, Hublin C, Partinen M, Kivimäki M, Koskenvuo M, Kaprio J: **Longitudinal**  
10 519 **study on poor sleep and life dissatisfaction in a nationwide cohort of twins.** *American Journal*  
11 520 *of Epidemiology* 2009, **169**(2):206-213.
- 12 521 7. Aw SB, Teh BT, Ling GHT, Leng PC, Chan WH, Ahmad MH: **The covid-19 pandemic situation**  
13 522 **in malaysia: Lessons learned from the perspective of population density.** *International journal*  
14 523 *of environmental research and public health* 2021, **18**(12):6566.
- 15 524 8. Pinto J, van Zeller M, Amorim P, Pimentel A, Dantas P, Eusébio E, Neves A, Pipa J, Santa Clara  
16 525 E, Santiago T: **Sleep quality in times of Covid-19 pandemic.** *Sleep medicine* 2020, **74**:81-85.
- 17 526 9. Musa NA, Moy FM, Wong LP: **Prevalence and factors associated with poor sleep quality**  
18 527 **among secondary school teachers in a developing country.** *Industrial health* 2018.
- 19 528 10. Souza JcD, Sousa ICd, Belísio AS, Azevedo CVMd: **Sleep habits, daytime sleepiness and sleep**  
20 529 **quality of high school teachers.** *Psychology & Neuroscience* 2012, **5**:257-263.
- 21 530 11. Kottwitz MU, Gerhardt C, Pereira D, Iseli L, Elfering A: **Teacher's sleep quality: linked to social**  
22 531 **job characteristics?** *Industrial health* 2017.
- 23 532 12. Freitas AMC, Araújo Tmd, Pinho Pds, Sousa CC, Oliveira PCS, Souza Fdo: **Sleep quality and**  
24 533 **associated factors among professors.** *Revista Brasileira de Saúde Ocupacional* 2021, **46**.
- 25 534 13. Teker AG, Luleci NE: **Sleep quality and anxiety level in employees.** *Northern clinics of Istanbul*  
26 535 2018, **5**(1):31.
- 27 536 14. Burdorf A, Porru F, Rugulies R: **The COVID-19 (Coronavirus) pandemic: consequences for**  
28 537 **occupational health.** *Scandinavian Journal of Work, Environment & Health* 2020, **46**(3):229-230.
- 29 538 15. Stranges S, Tigbe W, Gómez-Olivé FX, Thorogood M, Kandala N-B: **Sleep problems: an**  
30 539 **emerging global epidemic? Findings from the INDEPTH WHO-SAGE study among more**  
31 540 **than 40,000 older adults from 8 countries across Africa and Asia.** *Sleep* 2012, **35**(8):1173-1181.
- 32 541 16. Dumith SC, Meneghini KFD, Demenech LM: **Who are the individuals with the worst perceived**  
33 542 **quality of sleep? A population-based survey in southern Brazil.** *Preventive Medicine Reports*  
34 543 2021, **21**:101288.
- 35 544 17. Adams R, Appleton S, Taylor A, McEvoy D, Antic N: **Report to the sleep Health Foundation**  
36 545 **2016 sleep health survey of Australian adults.** *Adelaide: The Adelaide Institute for Sleep Health*  
37 546 *& The University of Adelaide* 2016.
- 38 547 18. Watson N, Badr M, Belenky G, Bliwise D, Buxton O, Buysse D, Dinges D, Gangwisch J, Grandner  
39 548 M, Kushida C: **Consensus Conference Panel Non-Participating Observers American Academy**  
40 549 **of Sleep Medicine Staff (2015) Recommended amount of sleep for a healthy adult: a joint**  
41 550 **consensus statement of the American Academy of Sleep Medicine and Sleep Research Society.**  
42 551 *J Clin Sleep Med*, **11**:591-592.
- 43 552 19. Organization WH: **WHO technical meeting on sleep and health: Bonn Germany, 22–24**  
44 553 **January 2004.** In.: World Health Organization. Regional Office for Europe; 2004.
- 45 554 20. Duran S, Erkin Ö: **Psychologic distress and sleep quality among adults in Turkey during the**  
46 555 **COVID-19 pandemic.** *Progress in Neuro-Psychopharmacology and Biological Psychiatry* 2021,  
47 556 **107**:110254.
- 48 557 21. Crepaldi T, Carvalhais J, Cotrim T: **Sleep Quality and Quality of Working Life Among**  
49 558 **Brazilian University Professors in Telework.** In: *Occupational and Environmental Safety and*  
50 559 *Health III.* edn. Edited by Arezes PM, Baptista JS, Carneiro P, Castelo Branco J, Costa N, Duarte  
51 560 J, Guedes JC, Melo RB, Miguel AS, Perestrelo G. Cham: Springer International Publishing; 2022:  
52 561 661-669.
- 53 562 22. **Sleep-RSPH, availbel at <https://www.rsph.org.uk/our-work/policy/wellbeing/sleep.html>**

1  
2  
3  
4  
5  
6  
7  
8  
9  
10  
11  
12  
13  
14  
15  
16  
17  
18  
19  
20  
21  
22  
23  
24  
25  
26  
27  
28  
29  
30  
31  
32  
33  
34  
35  
36  
37  
38  
39  
40  
41  
42  
43  
44  
45  
46  
47  
48  
49  
50  
51  
52  
53  
54  
55  
56  
57  
58  
59  
60

- 563
- 564 23. Colten HR, Altevogt BM: **Extent and health consequences of chronic sleep loss and sleep disorders.** *Sleep disorders and sleep deprivation: an unmet public health problem* 2006:55-135.
- 565
- 566 24. Roodbandi ASJ, Feyzi V, KHANJANI N, MOGHADAM SR, BAFGHI MS, MOGHADASI M, NOROUZI Z: **Sleep quality and sleepiness: a comparison between nurses with and without shift work, and university employees.** *International Journal of Occupational Hygiene* 2016, 8(4):230-236.
- 567
- 568
- 569
- 570 25. Chatlaong T, Pitanupong J, Wiwattanaworaset P: **Sleep quality and burnout syndrome among residents in training at the faculty of medicine, Prince of Songkla University.** *Siriraj Medical Journal* 2020, 72(4):307-314.
- 571
- 572
- 573 26. Manzar MD, Bekele BB, Noohu MM, Salahuddin M, Albougami A, Spence DW, Pandi-Perumal SR, Bahammam AS: **Prevalence of poor sleep quality in the Ethiopian population: a systematic review and meta-analysis.** *Sleep and Breathing* 2020, 24(2):709-716.
- 574
- 575
- 576 27. Huang Y, Zhao N: **Generalized anxiety disorder, depressive symptoms and sleep quality during COVID-19 outbreak in China: a web-based cross-sectional survey.** *Psychiatry research* 2020, 288:112954.
- 577
- 578
- 579 28. Gualano MR, Lo Moro G, Voglino G, Bert F, Siliquini R: **Effects of Covid-19 lockdown on mental health and sleep disturbances in Italy.** *International journal of environmental research and public health* 2020, 17(13):4779.
- 580
- 581
- 582 29. Marelli S, Castelnuovo A, Somma A, Castronovo V, Mombelli S, Bottoni D, Leitner C, Fossati A, Ferini-Strambi L: **Impact of COVID-19 lockdown on sleep quality in university students and administration staff.** *Journal of Neurology* 2021, 268(1):8-15.
- 583
- 584
- 585 30. Dowla SU: **Evaluating the effects of COVID-19 on mental health.** Brac University; 2021.
- 586
- 587 31. Rwigema P: **Impact of COVID-19 lockdowns on the education sector. The case of Rwanda.** *The Strategic Journal of Business & Change Management* 2021, 8(1):150-169.
- 588
- 589 32. Salehinejad MA, Majidinezhad M, Ghanavati E, Kouestanian S, Vicario CM, Nitsche MA, Nejati V: **Negative impact of COVID-19 pandemic on sleep quantitative parameters, quality, and circadian alignment: implications for health and psychological well-being.** *EXCLI journal* 2020, 19:1297.
- 590
- 591
- 592 33. Patil A, Bhavya SC, Srivastava S: **Eyeing computer vision syndrome: Awareness, knowledge, and its impact on sleep quality among medical students.** *Industrial psychiatry journal* 2019, 28(1):68.
- 593
- 594
- 595 34. Salehi SG, Hassani H, Mortezapour A, Sadeghniaat-Haghighi K: **Assessing of Sleepiness, Insomnia and Sleep Quality among University Students: Association between Computer Use and Sleep Quality.** *Annals of Military & Health Sciences Research* • Vol 2015, 13(4).
- 596
- 597
- 598 35. Chisale P, Mzumara T, Afonne J: **Knowledge Attitude, perception and knowledge and practice of prevention practices of computer vision syndrome among mzuzu university academic staff.** *J Eye Vis* 2019, 2(2):1-7.
- 599
- 600
- 601 36. Baker FC, Wolfson AR, Lee KA: **Association of sociodemographic, lifestyle, and health factors with sleep quality and daytime sleepiness in women: findings from the 2007 National Sleep Foundation “Sleep in America Poll”.** *Journal of women's health* 2009, 18(6):841-849.
- 602
- 603
- 604 37. Gellis LA, Lichstein KL, Scarinci IC, Durrence HH, Taylor DJ, Bush AJ, Riedel BW: **Socioeconomic status and insomnia.** *Journal of abnormal psychology* 2005, 114(1):111.
- 605
- 606 38. Ding D, Gebel K, Phongsavan P, Bauman AE, Merom D: **Driving: a road to unhealthy lifestyles and poor health outcomes.** *PloS one* 2014, 9(6):e94602.
- 607
- 608 39. Kabrita CS, Hajjar-Muçã TA, Duffy JF: **Predictors of poor sleep quality among Lebanese university students: association between evening typology, lifestyle behaviors, and sleep habits.** *Nature and science of sleep* 2014, 6:11.
- 609
- 610
- 611 40. Shochat T: **Impact of lifestyle and technology developments on sleep.** *Nature and science of sleep* 2012, 4:19.

- 1  
2  
3 613 41. Alonzo R, Hussain J, Stranges S, Anderson KK: **Interplay between social media use, sleep**  
4 614 **quality, and mental health in youth: A systematic review.** *Sleep Medicine Reviews* 2021,  
5 615 **56:101414.**
- 6 616 42. Berhanu H, Mossie A, Tadesse S, Geleta D: **Prevalence and associated factors of sleep quality**  
7 617 **among adults in Jimma Town, Southwest Ethiopia: a community-based cross-sectional study.**  
8 618 *Sleep disorders* 2018, **2018.**
- 9 619 43. Negussie BB, Emeria MS, Reta EY, Shiferaw BZ: **Sleep deprivation and associated factors**  
10 620 **among students of the Institute of Health in Jimma University, Southwest Ethiopia.** *Frontiers*  
11 621 *of Nursing* 2021, **8(3):303-311.**
- 12 622 44. Lin S-Y, Chung KKH: **Risk perception, perception of collective efficacy and sleep quality in**  
13 623 **Chinese adults during COVID-19 pandemic in Hong Kong: a cross-sectional study.**  
14 624 *International Journal of Environmental Research and Public Health* 2021, **18(21):11533.**
- 15 625 45. Amschler DH, McKenzie JF: **Perceived sleepiness, sleep habits and sleep concerns of public**  
16 626 **school teachers, administrators and other personnel.** *American Journal of Health Education*  
17 627 2010, **41(2):102-109.**
- 18 628 46. Alemayehu M, Nega A, Tegegne E, Mule Y: **Prevalence of self reported computer vision**  
19 629 **syndrome and associated factors among secretaries and data processors who are working in**  
20 630 **University of Gondar, Ethiopia.** *Journal of Biology, Agriculture and Healthcare* 2014, **4(15).**
- 21 631 47. Kabito GG, Wami SD, Chercos DH, Mekonnen TH: **Work-related Stress and Associated Factors**  
22 632 **among Academic Staffs at the University of Gondar, Northwest Ethiopia: An**  
23 633 **Institutionbased Cross-sectional Study.** *Ethiopian journal of health sciences* 2020, **30(2).**
- 24 634 48. Daniel WW, Cross CL: **Biostatistics: a foundation for analysis in the health sciences:** Wiley;  
25 635 2018.
- 26 636 49. Martínez-Mesa J, González-Chica DA, Bastos JL, Bonamigo RR, Duquia RP: **Sample size: how**  
27 637 **many participants do I need in my research?** *Anais brasileiros de dermatologia* 2014, **89:609-**  
28 638 **615.**
- 29 639 50. Buysse DJ, Reynolds III CF, Monk TH, Berman SR, Kupfer DJ: **The Pittsburgh Sleep Quality**  
30 640 **Index: a new instrument for psychiatric practice and research.** *Psychiatry research* 1989,  
31 641 **28(2):193-213.**
- 32 642 51. Salahuddin M, Maru TT, Kumalo A, Pandi-Perumal SR, Bahammam AS, Manzar MD: **Validation**  
33 643 **of the Pittsburgh sleep quality index in community dwelling Ethiopian adults.** *Health and*  
34 644 *quality of life outcomes* 2017, **15(1):1-7.**
- 35 645 52. Seidell JC, Flegal KM: **Assessing obesity: classification and epidemiology.** *British medical*  
36 646 *bulletin* 1997, **53(2):238-252.**
- 37 647 53. Nakata A, Ikeda T, Takahashi M, Haratani T, Hojou M, Swanson NG, Fujioka Y, Araki S: **The**  
38 648 **prevalence and correlates of occupational injuries in small-scale manufacturing enterprises.**  
39 649 *Journal of occupational health* 2006, **48(5):366-376.**
- 40 650 54. Jemere T, Mossie A, Berhanu H, Yeshaw Y: **Poor sleep quality and its predictors among type 2**  
41 651 **diabetes mellitus patients attending Jimma University Medical Center, Jimma, Ethiopia.**  
42 652 *BMC research notes* 2019, **12(1):1-6.**
- 43 653 55. Rolander B, Bellner A-L: **Experience of musculo-skeletal disorders, intensity of pain, and**  
44 654 **general conditions in work--the case of employees in non-private dental clinics in a county in**  
45 655 **southern Sweden.** *Work* 2001, **17(1):65-73.**
- 46 656 56. Negussie BB, Emeria MS, Reta EY, Shiferaw BZ: **Sleep deprivation and associated factors**  
47 657 **among students of the Institute of Health in Jimma University, Southwest Ethiopia.** *Frontiers*  
48 658 *of Nursing*, **8(3):303-311.**
- 49 659 57. Abdu Z, Hajure M: **Prevalence and Associated Factors of Poor Quality of Sleep among**  
50 660 **Prisoners in Mettu Town Prison, Oromia, South West Ethiopia, 2019.** *The Open Public Health*  
51 661 *Journal* 2020, **13(1).**
- 52 662 58. Azene ZN, Merid MW, Muluneh AG, Geberu DM, Kassa GM, Yenit MK, Tilahun SY, Gelaye  
53 663 KA, Mekonnen HS, Azage AW: **Adherence towards COVID-19 mitigation measures and its**

- 664 **associated factors among Gondar City residents: A community-based cross-sectional study**  
 665 **in Northwest Ethiopia.** *PloS one* 2020, **15**(12):e0244265.
- 666 59. Macdonald S, MacIntyre P: **The generic job satisfaction scale: Scale development and its**  
 667 **correlates.** *Employee Assistance Quarterly* 1997, **13**(2):1-16.
- 668 60. The Marlin Company NH, CT, and the American Institute of Stress, Yonkers, NY,: **The**  
 669 **Workplace Stress Scale™** Available at: [https://teorionline.files.wordpress.com/2011/04/unit-3-](https://teorionline.files.wordpress.com/2011/04/unit-3-the-workplace-stress-scale.pdf)  
 670 [the-workplace-stress-scale.pdf](https://teorionline.files.wordpress.com/2011/04/unit-3-the-workplace-stress-scale.pdf) . Accessed on 10 June 2019.
- 671 61. Cohen S, Kamarck T, Mermelstein R: **Perceived stress scale.** *Measuring stress: A guide for health*  
 672 *and social scientists* 1994, **10**(2):1-2.
- 673 62. Birhanu TT, Salih MH, Abate HK: **Sleep Quality and Associated Factors Among Diabetes**  
 674 **Mellitus Patients in a Follow-Up Clinic at the University of Gondar Comprehensive**  
 675 **Specialized Hospital in Gondar, Northwest Ethiopia: A Cross-Sectional Study.** *Diabetes,*  
 676 *metabolic syndrome and obesity: targets and therapy* 2020, **13**:4859.
- 677 63. Wondie T, Molla A, Mulat H, Damene W, Bekele M, Madoro D, Yohannes K: **Magnitude and**  
 678 **correlates of sleep quality among undergraduate medical students in Ethiopia: cross-**  
 679 **sectional study.** *Sleep Science and Practice* 2021, **5**(1):1-8.
- 680 64. James BO, Omoaregba JO, Igberase OO: **Prevalence and correlates of poor sleep quality among**  
 681 **medical students at a Nigerian university.** *Ann Nigerian Med* 2011, **5**(1):1-5.
- 682 65. Smyth C: **The Pittsburgh sleep quality index (PSQI).** In., vol. 25: SLACK Incorporated  
 683 Thorofare, NJ; 1999: 10-10.
- 684 66. Mollayeva T, Thurairajah P, Burton K, Mollayeva S, Shapiro CM, Colantonio A: **The Pittsburgh**  
 685 **sleep quality index as a screening tool for sleep dysfunction in clinical and non-clinical**  
 686 **samples: A systematic review and meta-analysis.** *Sleep medicine reviews* 2016, **25**:52-73.
- 687 67. Zailinawati A, Teng C, Chung Y, Teow T, Lee P, Jagmohni K: **Daytime sleepiness and sleep**  
 688 **quality among Malaysian medical students.** *The Medical journal of Malaysia* 2009, **64**(2):108-  
 689 110.
- 690 68. Backhaus J, Junghanns K, Broocks A, Riemann D, Hohagen F: **Test-retest reliability and validity**  
 691 **of the Pittsburgh Sleep Quality Index in primary insomnia.** *Journal of psychosomatic research*  
 692 2002, **53**(3):737-740.
- 693 69. Bertolazi AN, Fagondes SC, Hoff LS, Dartora EG, da Silva Miozzo IC, de Barba MEF, Barreto  
 694 SSM: **Validation of the Brazilian Portuguese version of the Pittsburgh sleep quality index.**  
 695 *Sleep medicine* 2011, **12**(1):70-75.
- 696 70. Kwok KO, Li KK, Chan HHH, Yi YY, Tang A, Wei WI, Wong SYS: **Community responses**  
 697 **during early phase of COVID-19 epidemic, Hong Kong.** *Emerging infectious diseases* 2020,  
 698 **26**(7):1575.
- 699 71. Mekonnen TH, Abere G, Olkeba SW: **Risk Factors Associated with Upper Extremity**  
 700 **Musculoskeletal Disorders among Barbers in Gondar Town, Northwest Ethiopia, 2018: A**  
 701 **Cross-Sectional Study.** *Pain Research and Management* 2019, **2019**(2019):1-9.
- 702 72. Mekonnen TH, Yenealem DG: **Factors affecting healthcare utilization for low back pain among**  
 703 **nurses in Gondar town, northwest Ethiopia, 2018: a cross-sectional study.** *BMC Res Notes*  
 704 2019, **12**(185):1-6.
- 705 73. Meaza H, Temesgen MH, Redae G, Hailemariam TT, Alamer A: **Prevalence of Musculoskeletal**  
 706 **Pain Among Academic Staff of Mekelle University, Ethiopia.** *Clinical Medicine Insights:*  
 707 *Arthritis and Musculoskeletal Disorders* 2020, **13**:1179544120974671.
- 708 74. Etana G, Ayele M, Abdissa D, Gerbi A: **Prevalence of Work Related Musculoskeletal Disorders**  
 709 **and Associated Factors Among Bank Staff in Jimma City, Southwest Ethiopia, 2019: An**  
 710 **Institution-Based Cross-Sectional Study.** *Journal of Pain Research* 2021, **14**:2071.
- 711 75. Hosmer DW, Hjort NL: **Goodness-of-fit processes for logistic regression: simulation results.**  
 712 *Statistics in medicine* 2002, **21**(18):2723-2738.
- 713 76. de Sousa AR, Santos RB, da Silva RM, Santos CCT, Lopes VC, Mussi FC: **Occupational stress**  
 714 **and sleep quality in professors of the health area.** *Rev Rene* 2018(19):60.

- 1  
2  
3 715 77. Farah NM, Saw Yee T, Mohd Rasdi HF: **Self-reported sleep quality using the Malay version of**  
4 716 **the Pittsburgh sleep quality index (PSQI-M) in Malaysian adults.** *International journal of*  
5 717 *environmental research and public health* 2019, **16**(23):4750.
- 6 718 78. Vandewalle G, Archer SN, Wuillaume C, Balteau E, Degueldre C, Luxen A, Dijk D-J, Maquet P:  
7 719 **Effects of light on cognitive brain responses depend on circadian phase and sleep homeostasis.**  
8 720 *Journal of biological rhythms* 2011, **26**(3):249-259.
- 9 721 79. Virtanen M, Ferrie JE, Gimeno D, Vahtera J, Elovainio M, Singh-Manoux A, Marmot MG,  
10 722 Kivimäki M: **Long working hours and sleep disturbances: the Whitehall II prospective cohort**  
11 723 **study.** *Sleep* 2009, **32**(6):737-745.
- 12 724 80. Jansen N, Kant I, van Amelsvoort L, Nijhuis F, van den Brandt P: **Need for recovery from work:**  
13 725 **evaluating short-term effects of working hours, patterns and schedules.** *Ergonomics* 2003,  
14 726 **46**(7):664-680.
- 15 727 81. Bannai A, Ukawa S, Tamakoshi A: **Long working hours and sleep problems among public**  
16 728 **junior high school teachers in Japan.** *Journal of occupational health* 2015:15-0053-OA.
- 17 729 82. Ferrie J, Gimeno D, Vahtera J, Elovainio M, Singh-Manoux A, Marmot M, Kivimäki M: **Long**  
18 730 **working hours and sleep disturbances: the Whitehall II prospective cohort study.** *Virtanen*  
19 731 **M. SLEEP MEDICINE**:129.
- 20 732 83. Byrd E: **The Effect of the Use of An Electronic Device Before Bed on Sleep Quality.** 2019.
- 21 733 84. Walsh NA, Rodriguez N, Repa LM, King E, Garland SN: **Associations between device use before**  
22 734 **bed, mood disturbance, and insomnia symptoms in young adults.** *Sleep Health* 2020, **6**(6):822-  
23 735 827.
- 24 736 85. Fossum IN, Nordnes LT, Storemark SS, Bjorvatn B, Pallesen S: **The association between use of**  
25 737 **electronic media in bed before going to sleep and insomnia symptoms, daytime sleepiness,**  
26 738 **morningness, and chronotype.** *Behavioral sleep medicine* 2014, **12**(5):343-357.
- 27 739 86. Salfi F, Amicucci G, Corigliano D, D'Atri A, Viselli L, Tempesta D, Ferrara M: **Changes of**  
28 740 **evening exposure to electronic devices during the COVID-19 lockdown affect the time course**  
29 741 **of sleep disturbances.** *Sleep* 2021, **44**(9):zsab080.
- 30 742 87. Shechter A, Kim EW, St-Onge M-P, Westwood AJ: **Blocking nocturnal blue light for insomnia:**  
31 743 **A randomized controlled trial.** *J Psychiatr Res* 2018, **96**:196-202.
- 32 744 88. Sobaih AEE, Hasanein AM, Abu Elnasr AE: **Responses to COVID-19 in Higher Education:**  
33 745 **Social Media Usage for Sustaining Formal Academic Communication in Developing**  
34 746 **Countries.** *Sustainability* 2020, **12**(16):6520.
- 35 747 89. Yan J, Kim S, Zhang SX, Foo M-D, Alvarez-Risco A, Del-Aguila-Arcentales S, Yáñez JA:  
36 748 **Hospitality workers' COVID-19 risk perception and depression: A contingent model based**  
37 749 **on transactional theory of stress model.** *International Journal of Hospitality Management* 2021,  
38 750 **95**:102935.
- 39 751 90. Iorga M, Iurcov R, Pop L-M: **The Relationship between Fear of Infection and Insomnia among**  
40 752 **Dentists from Oradea Metropolitan Area during the Outbreak of Sars-CoV-2 Pandemic.**  
41 753 *Journal of Clinical Medicine* 2021, **10**(11):2494.
- 42 754 91. Kesintha A, Rampal L, Sherina M, Kalaiselvam T: **Prevalence and predictors of poor sleep**  
43 755 **quality among secondary school students in Gombak District, Selangor.** *Med J Malaysia* 2018,  
44 756 **73**(1):32-40.
- 45 757 92. Herawati K, Gayatri D: **The correlation between sleep quality and levels of stress among**  
46 758 **students in Universitas Indonesia.** *Enfermeria clinica* 2019, **29**:357-361.
- 47 759 93. Hirotsu C, Tufik S, Andersen ML: **Interactions between sleep, stress, and metabolism: From**  
48 760 **physiological to pathological conditions.** *Sleep Science* 2015, **8**(3):143-152.
- 49 761 94. Han KS, Kim L, Shim I: **Stress and sleep disorder.** *Experimental neurobiology* 2012, **21**(4):141.
- 50  
51  
52  
53 762  
54  
55  
56  
57  
58  
59  
60



STROBE Statement—Checklist of items that should be included in reports of *cross-sectional studies*

|                           | Item No | Recommendation                                                                                                                                                                                      | Page No  |
|---------------------------|---------|-----------------------------------------------------------------------------------------------------------------------------------------------------------------------------------------------------|----------|
| <b>Title and abstract</b> | 1       | (a) Indicate the study's design with a commonly used term in the title or the abstract                                                                                                              | 2        |
|                           |         | (b) Provide in the abstract an informative and balanced summary of what was done and what was found                                                                                                 | 2        |
| <b>Introduction</b>       |         |                                                                                                                                                                                                     |          |
| Background/rationale      | 2       | Explain the scientific background and rationale for the investigation being reported                                                                                                                | 3 to 5   |
| Objectives                | 3       | State specific objectives, including any prespecified hypotheses                                                                                                                                    | 4        |
| <b>Methods</b>            |         |                                                                                                                                                                                                     |          |
| Study design              | 4       | Present key elements of study design early in the paper                                                                                                                                             | 5        |
| Setting                   | 5       | Describe the setting, locations, and relevant dates, including periods of recruitment, exposure, follow-up, and data collection                                                                     | 5        |
| Participants              | 6       | (a) Give the eligibility criteria, and the sources and methods of selection of participants                                                                                                         | 5        |
| Variables                 | 7       | Clearly define all outcomes, exposures, predictors, potential confounders, and effect modifiers. Give diagnostic criteria, if applicable                                                            | 6 to 7   |
| Data sources/ measurement | 8*      | For each variable of interest, give sources of data and details of methods of assessment (measurement). Describe comparability of assessment methods if there is more than one group                | 8 to 9   |
| Bias                      | 9       | Describe any efforts to address potential sources of bias                                                                                                                                           | 10       |
| Study size                | 10      | Explain how the study size was arrived at                                                                                                                                                           |          |
| Quantitative variables    | 11      | Explain how quantitative variables were handled in the analyses. If applicable, describe which groupings were chosen and why                                                                        |          |
| Statistical methods       | 12      | (a) Describe all statistical methods, including those used to control for confounding                                                                                                               | 10       |
|                           |         | (b) Describe any methods used to examine subgroups and interactions                                                                                                                                 | 10       |
|                           |         | (c) Explain how missing data were addressed                                                                                                                                                         |          |
|                           |         | (d) If applicable, describe analytical methods taking account of sampling strategy                                                                                                                  |          |
|                           |         | (e) Describe any sensitivity analyses                                                                                                                                                               |          |
| <b>Results</b>            |         |                                                                                                                                                                                                     |          |
| Participants              | 13*     | (a) Report numbers of individuals at each stage of study—e.g. numbers potentially eligible, examined for eligibility, confirmed eligible, included in the study, completing follow-up, and analysed | 5        |
|                           |         | (b) Give reasons for non-participation at each stage                                                                                                                                                |          |
|                           |         | (c) Consider use of a flow diagram                                                                                                                                                                  |          |
| Descriptive data          | 14*     | (a) Give characteristics of study participants (e.g. demographic, clinical, social) and information on exposures and potential confounders                                                          | 11 to 13 |
|                           |         | (b) Indicate number of participants with missing data for each variable of interest                                                                                                                 |          |
| Outcome data              | 15*     | Report numbers of outcome events or summary measures                                                                                                                                                | 14 to 15 |

|    |                          |    |                                                                                                                                                                                                              |
|----|--------------------------|----|--------------------------------------------------------------------------------------------------------------------------------------------------------------------------------------------------------------|
| 1  |                          |    |                                                                                                                                                                                                              |
| 2  | Main results             | 16 | (a) Give unadjusted estimates and, if applicable, confounder-adjusted estimates and their precision (eg, 95% confidence interval). Make clear which confounders were adjusted for and why they were included |
| 3  |                          |    |                                                                                                                                                                                                              |
| 4  |                          |    |                                                                                                                                                                                                              |
| 5  |                          |    |                                                                                                                                                                                                              |
| 6  |                          |    | (b) Report category boundaries when continuous variables were categorized                                                                                                                                    |
| 7  |                          |    |                                                                                                                                                                                                              |
| 8  |                          |    | (c) If relevant, consider translating estimates of relative risk into absolute risk for a meaningful time period                                                                                             |
| 9  |                          |    |                                                                                                                                                                                                              |
| 10 |                          |    |                                                                                                                                                                                                              |
| 11 | Other analyses           | 17 | Report other analyses done—eg analyses of subgroups and interactions, and sensitivity analyses                                                                                                               |
| 12 |                          |    |                                                                                                                                                                                                              |
| 13 |                          |    |                                                                                                                                                                                                              |
| 14 | <b>Discussion</b>        |    |                                                                                                                                                                                                              |
| 15 | Key results              | 18 | Summarise key results with reference to study objectives                                                                                                                                                     |
| 16 | Limitations              | 19 | Discuss limitations of the study, taking into account sources of potential bias or imprecision. Discuss both direction and magnitude of any potential bias                                                   |
| 17 |                          |    |                                                                                                                                                                                                              |
| 18 |                          |    |                                                                                                                                                                                                              |
| 19 |                          |    |                                                                                                                                                                                                              |
| 20 | Interpretation           | 20 | Give a cautious overall interpretation of results considering objectives, limitations, multiplicity of analyses, results from similar studies, and other relevant evidence                                   |
| 21 |                          |    |                                                                                                                                                                                                              |
| 22 |                          |    |                                                                                                                                                                                                              |
| 23 |                          |    |                                                                                                                                                                                                              |
| 24 | Generalisability         | 21 | Discuss the generalisability (external validity) of the study results                                                                                                                                        |
| 25 |                          |    |                                                                                                                                                                                                              |
| 26 | <b>Other information</b> |    |                                                                                                                                                                                                              |
| 27 | Funding                  | 22 | Give the source of funding and the role of the funders for the present study and, if applicable, for the original study on which the present article is based                                                |
| 28 |                          |    |                                                                                                                                                                                                              |
| 29 |                          |    |                                                                                                                                                                                                              |
| 30 |                          |    |                                                                                                                                                                                                              |

\*Give information separately for exposed and unexposed groups.

**Note:** An Explanation and Elaboration article discusses each checklist item and gives methodological background and published examples of transparent reporting. The STROBE checklist is best used in conjunction with this article (freely available on the Web sites of PLoS Medicine at <http://www.plosmedicine.org/>, Annals of Internal Medicine at <http://www.annals.org/>, and Epidemiology at <http://www.epidem.com/>). Information on the STROBE Initiative is available at [www.strobe-statement.org](http://www.strobe-statement.org).
